# Supplementary material for: In Situ Structure of a Mo-Doped Pt–Ni Catalyst during Electrochemical Oxygen Reduction Resolved from Machine Learning-Based Grand Canonical Global Optimization
Source: PubMed Central journal article supplement — JACS Au. 2023 Mar 16;3(4):1162–75. doi: 10.1021/jacsau.3c00038 (PMC10131196; doi:10.1021/jacsau.3c00038), 2023-03-16
Supplement: au3c00038_si_001.pdf [file au3c00038_si_001.pdf]

# Supporting Information

## In situ Structure of Mo-doped Pt-Ni Catalyst during Electrochemical Oxygen Reduction Resolved from Machine Learning Based Grand Canonical Global Optimization

Ji-Li Li, Ye-Fei Li\*, and Zhi-Pan Liu\*

Collaborative Innovation Center of Chemistry for Energy Material, Shanghai Key Laboratory of Molecular Catalysis and Innovative Materials, Key Laboratory of Computational Physical Science, Department of Chemistry, Fudan University, Shanghai 200433, China

### Table of Contents

|                                                                                                                                                                                                                  |    |
|------------------------------------------------------------------------------------------------------------------------------------------------------------------------------------------------------------------|----|
| 1. Methodology and Calculation Details.....                                                                                                                                                                      | 2  |
| 1.1 Stochastic surface walking global optimization using neural network potential energy surface (SSW-NN).....                                                                                                   | 2  |
| 1.2 Benchmark of G-NN potential against DFT calculations .....                                                                                                                                                   | 30 |
| 1.3 Calculation Details of GCMC/SSW-NN method.....                                                                                                                                                               | 35 |
| 2. GCMC/SSW-NN trajectory of Pt <sub>75.0</sub> Ni <sub>25.0</sub> surface.....                                                                                                                                  | 41 |
| 3. GCMC/SSW-NN trajectories of PtNiMo Surfaces.....                                                                                                                                                              | 43 |
| 4. ORR Activity on Pt <sub>75.0</sub> Ni <sub>22.3</sub> Mo <sub>2.7</sub> (111), Pt <sub>83.5</sub> Ni <sub>13.8</sub> Mo <sub>2.7</sub> (111), and Pt <sub>75.0</sub> Ni <sub>25.0</sub> (111)-0.16 ML O ..... | 54 |
| 5. Dissolution Free Energy of *MO <sub>4</sub> .....                                                                                                                                                             | 57 |
| 6. Dissolution Free Energy of *MoO <sub>4</sub> .....                                                                                                                                                            | 62 |
| 7. The specific activities of ORR catalysts at different CV cycles from experimental literature .....                                                                                                            | 65 |
| Reference.....                                                                                                                                                                                                   | 66 |

## 1. Methodology and Calculation Details

### 1.1 Stochastic surface walking global optimization using neural network potential energy surface (SSW-NN)

#### Architecture of the high dimensional neural network (HDNN)

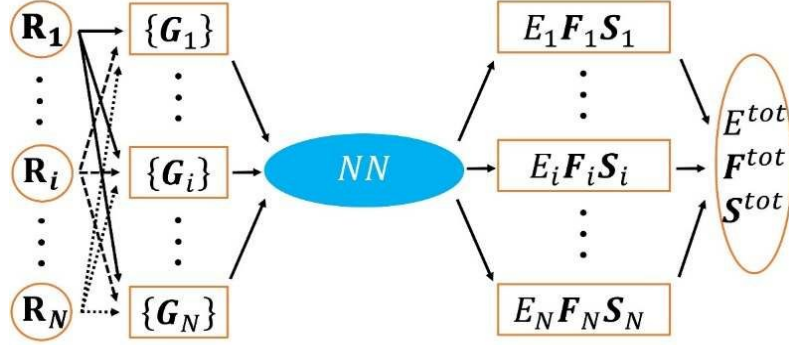

**Scheme S1.** Scheme for HDNN architecture. The subscript  $i$  is atom index;  $N$  is the number of atoms. The inputs of HDNN are a set of atom-centered symmetry functions  $\{G_i\}$ , which is constructed from a set of Cartesian coordinates  $\{R_i\}$ . The outputs are the atomic properties  $\{E_i, F_i, S_i\}$ , i.e., energy, force and stress. The overall properties of a structure, namely,  $E^{tot}$ ,  $F^{tot}$ , or  $S^{tot}$ , are calculated by summing the atomic properties,  $E_i, F_i, S_i$ .

To build the high dimensional neural network (HDNN) potential energy surface<sup>1-2</sup>, we utilized the SSW global optimization to generate the global dataset for Pt-Ni-Mo-O-H system. The HDNN architecture is schematically shown in Scheme S1. The total energy  $E^{tot}$  is obtained by summing the atomic energy  $E_i$ , which is the output of the standard neural network (see Eq. 1.). The inputs,  $\{G_i\}$ , are a set of atom-centered symmetry functions (also called geometry-based structural descriptors).

$$E^{tot} = \sum_i E_i \#(1.)$$

#### Structure Descriptors

The atom-centered symmetry functions are calculated a series of power-type structure descriptors (PTSDs)<sup>1-2</sup>, which is developed by our group. There are six types of PTSDs, namely  $S^1$  to  $S^6$ , which have the following mathematic forms:

$$f_c(R_{ij}) = \begin{cases} 0.5 \times \tanh^3 \left[ 1 - \frac{r_{ij}}{r_c} \right], & \text{for } r_{ij} \leq r_c \#(2.) \\ 0, & \text{for } r_{ij} > r_c \end{cases}$$

$$R^n(r_{ij}) = r_{ij}^n \cdot f_c(r_{ij}) \#(3)$$

$$S_i^1 = \sum_{j \neq i} R^n(r_{ij}) \#(4)$$

$$S_i^2 = \left[ \sum_{m=-L}^L |\sum_{j \neq i} R^n(r_{ij}) Y_{Lm}(r_{ij})|^2 \right]^{\frac{1}{2}} \#(5)$$

$$S_i^3 = 2^{1-\zeta} \sum_{j,k \neq i} (1 + \lambda \cos \theta_{ijk})^\zeta \cdot R^n(r_{ij}) \cdot R^m(r_{ik}) \#(6)$$

$$S_i^4 = 2^{1-\zeta} \sum GU_4 = 2^{1-\zeta} \sum_{j,k \neq i} (1 + \lambda \cos \theta_{ijk})^\zeta \cdot R^n(r_{ij}) \cdot R^m(r_{ik}) \cdot R^p(r_{ik}) \#(O)$$

$$S_i^5 = \left[ \sum_{m=-L}^L |\sum GU_5|^2 \right]^{\frac{1}{2}}$$

$$= \left[ \sum_{m=-L}^L \left| \sum_{j,k \neq i} R^n(r_{ij}) \cdot R^m(r_{ik}) \cdot R^p(r_{ik}) \cdot (Y_{Lm}(r_{ij}) + Y_{Lm}(r_{ik})) \right|^2 \right]^{\frac{1}{2}} \#(8.)$$

$$S_i^6 = 2^{1-\zeta} \sum GU_6 = 2^{1-\zeta} \sum_{j,k,l \neq i} (1 + \lambda \cos \theta_{ijk})^\zeta \cdot R^n(r_{ij}) \cdot R^m(r_{ik}) \cdot R^p(r_{il}) \#(O)$$

Each PTSD can be considered as a sum of the n-body functions, named as the group unit (GU). The power function  $R^n(r_{ij})$  represents the radial function in the GU. In the equations,  $r_{ij}$  is the distance of atomic pairs,  $r_c$  is the cutoff, beyond which the value of Eq. 2 is equal to zero,  $Y_{Lm}(r_{ik})$  is the spherical harmonic function, and n, m, p,  $\lambda$ , and  $\zeta$  are power parameters. Depending on the functional form of GU, the PTSDs  $S_i^1$ ,  $S_i^2$ ,  $S_i^3$ ,  $S_i^4$ ,  $S_i^5$  and  $S_i^6$  can be considered as 2-body, 3-body and 4-body functions, respectively, where the  $S_i^2$  and  $S_i^5$  involve also spherical function.

### Construction of global dataset for HDNN training (G-NN)

The building of dataset is the key factor that determines the accuracy of the potential energy surface (PES) of G-NN. Our previous works have shown that, the SSW<sup>3-5</sup> global optimization can fast generate a global dataset, which incorporates structures with notably different structural patterns on the global PES. The SSW global optimization is fully automated and does not need a priori knowledge on the system, such as the structure motif (e.g., bonding patterns, symmetry) of the materials.

The overall approach to generate G-NN and its implementations are briefly divided into six steps (see in Scheme S2):

(i) Generating the global dataset by computing the selected structures from the SSW trajectories using DFT.

(ii) Training the G-NN potential with the global dataset.

(iii) Benchmarking the accuracy between the current G-NN potential and DFT values for a few randomly selected structures from a trial SSW-NN calculations. The structures with large error are added in the dataset to retrain the G-NN potential.

(iv) Iteratively performing (i)-(iii) steps until the PES deviation is low enough. The RMSE for G-NN potential is typically 5~10 meV/atom for energy and 0.1~0.2 eV/Å for force.

(v) Performing the SSW global optimization on the NN PES for target problem.

(vi) Recomputing the energy of key structures with DFT calculations, in which Bayesian optimization is utilized to drive the iterative acquisition-surrogate procedure.

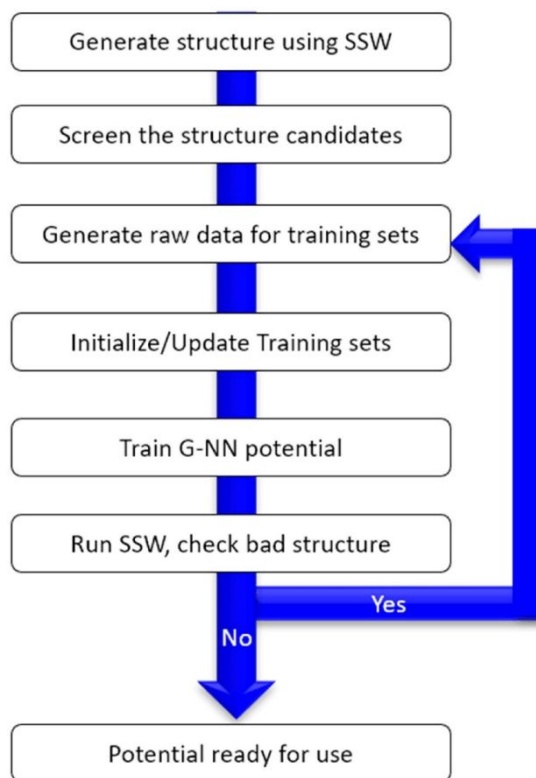

**Scheme S2.** Overall procedure for generating the training dataset using SSW global optimization.

**Table S1.** Number of structures for the global data set to train the Pt-Ni-Mo-O-H potential.

| Species  | $N_{\text{atom}}$ | $N_{\text{cluster}}$ | $N_{\text{layer}}$ | $N_{\text{bulk}}$ | total |
|----------|-------------------|----------------------|--------------------|-------------------|-------|
| Pt16     | 16                | 3107                 | 7                  | 10606             | 13720 |
| Mo1-Pt15 | 16                | 0                    | 0                  | 113               | 113   |
| Mo2-Pt14 | 16                | 0                    | 0                  | 165               | 165   |
| Mo3-Pt13 | 16                | 0                    | 0                  | 150               | 150   |
| Mo4-Pt12 | 16                | 0                    | 0                  | 140               | 140   |
| Mo5-Pt10 | 15                | 0                    | 0                  | 3                 | 3     |
| Mo5-Pt11 | 16                | 0                    | 0                  | 137               | 137   |
| Mo6-Pt9  | 15                | 0                    | 0                  | 5                 | 5     |
| Mo6-Pt10 | 16                | 0                    | 0                  | 132               | 132   |
| Mo6-Pt42 | 48                | 0                    | 0                  | 4                 | 4     |
| Mo7-Pt8  | 15                | 0                    | 0                  | 7                 | 7     |
| Mo7-Pt9  | 16                | 0                    | 0                  | 151               | 151   |
| Mo8-Pt7  | 15                | 0                    | 0                  | 6                 | 6     |
| Mo8-Pt8  | 16                | 0                    | 1                  | 157               | 158   |
| Mo8-Pt24 | 32                | 0                    | 36                 | 40                | 76    |
| Mo9-Pt6  | 15                | 0                    | 0                  | 13                | 13    |
| Mo9-Pt7  | 16                | 0                    | 0                  | 177               | 177   |
| Mo10-Pt5 | 15                | 0                    | 0                  | 21                | 21    |
| Mo10-Pt6 | 16                | 0                    | 0                  | 115               | 115   |

|               |    |   |     |     |     |
|---------------|----|---|-----|-----|-----|
| Mo11-Pt4      | 15 | 0 | 0   | 14  | 14  |
| Mo11-Pt5      | 16 | 0 | 0   | 162 | 162 |
| Mo12-Pt3      | 15 | 0 | 0   | 20  | 20  |
| Mo12-Pt4      | 16 | 0 | 1   | 147 | 148 |
| Mo12-Pt36     | 48 | 0 | 0   | 7   | 7   |
| Mo13-Pt2      | 15 | 0 | 0   | 25  | 25  |
| Mo13-Pt3      | 16 | 0 | 0   | 154 | 154 |
| Mo14-Pt1      | 15 | 0 | 0   | 24  | 24  |
| Mo14-Pt2      | 16 | 0 | 0   | 149 | 149 |
| Mo14-Pt15     | 29 | 0 | 37  | 23  | 60  |
| Mo15          | 15 | 0 | 0   | 154 | 154 |
| Mo15-Pt1      | 16 | 0 | 0   | 122 | 122 |
| Mo16          | 16 | 0 | 0   | 363 | 363 |
| Mo18-Pt46     | 64 | 0 | 7   | 3   | 10  |
| Mo23-Pt6      | 29 | 0 | 68  | 123 | 191 |
| Mo24-Pt24     | 48 | 0 | 0   | 8   | 8   |
| Mo28          | 28 | 0 | 1   | 0   | 1   |
| Mo29-Pt19     | 48 | 0 | 0   | 15  | 15  |
| Mo30-Pt2      | 32 | 0 | 146 | 227 | 373 |
| Mo31-Pt1      | 32 | 0 | 177 | 142 | 319 |
| Mo32          | 32 | 0 | 0   | 1   | 1   |
| Mo36-Pt12     | 48 | 0 | 0   | 9   | 9   |
| Mo42-Pt6      | 48 | 0 | 0   | 58  | 58  |
| Mo46-Pt18     | 64 | 0 | 17  | 9   | 26  |
| Mo48          | 48 | 0 | 0   | 11  | 11  |
| Ni1-Pt15      | 16 | 0 | 2   | 2   | 4   |
| Ni1-Mo1-Pt13  | 15 | 0 | 0   | 2   | 2   |
| Ni1-Mo2-Pt12  | 15 | 0 | 0   | 7   | 7   |
| Ni1-Mo3-Pt11  | 15 | 0 | 0   | 8   | 8   |
| Ni1-Mo4-Pt10  | 15 | 0 | 0   | 11  | 11  |
| Ni1-Mo5-Pt9   | 15 | 0 | 0   | 13  | 13  |
| Ni1-Mo6-Pt8   | 15 | 0 | 0   | 15  | 15  |
| Ni1-Mo7-Pt7   | 15 | 0 | 0   | 21  | 21  |
| Ni1-Mo8-Pt6   | 15 | 0 | 0   | 12  | 12  |
| Ni1-Mo9-Pt5   | 15 | 0 | 0   | 18  | 18  |
| Ni1-Mo9-Pt6   | 16 | 0 | 0   | 1   | 1   |
| Ni1-Mo10-Pt4  | 15 | 0 | 0   | 13  | 13  |
| Ni1-Mo10-Pt5  | 16 | 0 | 0   | 1   | 1   |
| Ni1-Mo11-Pt3  | 15 | 0 | 0   | 10  | 10  |
| Ni1-Mo11-Pt4  | 16 | 0 | 1   | 2   | 3   |
| Ni1-Mo11-Pt36 | 48 | 0 | 0   | 26  | 26  |

|               |    |   |    |      |      |
|---------------|----|---|----|------|------|
| Ni1-Mo12-Pt2  | 15 | 0 | 0  | 4    | 4    |
| Ni1-Mo12-Pt3  | 16 | 0 | 0  | 7    | 7    |
| Ni1-Mo13-Pt1  | 15 | 0 | 0  | 4    | 4    |
| Ni1-Mo13-Pt2  | 16 | 0 | 0  | 5    | 5    |
| Ni1-Mo14      | 15 | 0 | 0  | 25   | 25   |
| Ni1-Mo14-Pt1  | 16 | 0 | 0  | 9    | 9    |
| Ni1-Mo15      | 16 | 0 | 1  | 10   | 11   |
| Ni1-Mo22-Pt6  | 29 | 0 | 75 | 78   | 153  |
| Ni1-Mo22-Pt9  | 32 | 0 | 0  | 1    | 1    |
| Ni1-Mo23-Pt24 | 48 | 0 | 0  | 7    | 7    |
| Ni1-Mo28-Pt3  | 32 | 0 | 0  | 1    | 1    |
| Ni1-Mo28-Pt19 | 48 | 0 | 0  | 27   | 27   |
| Ni2-Pt13      | 15 | 0 | 0  | 2176 | 2176 |
| Ni2-Mo1-Pt12  | 15 | 0 | 0  | 16   | 16   |
| Ni2-Mo2-Pt11  | 15 | 0 | 0  | 32   | 32   |
| Ni2-Mo3-Pt10  | 15 | 0 | 0  | 24   | 24   |
| Ni2-Mo3-Pt11  | 16 | 0 | 1  | 0    | 1    |
| Ni2-Mo4-Pt9   | 15 | 0 | 0  | 16   | 16   |
| Ni2-Mo5-Pt8   | 15 | 0 | 0  | 13   | 13   |
| Ni2-Mo6-Pt7   | 15 | 0 | 0  | 7    | 7    |
| Ni2-Mo6-Pt8   | 16 | 0 | 0  | 1    | 1    |
| Ni2-Mo7-Pt6   | 15 | 0 | 0  | 3    | 3    |
| Ni2-Mo8-Pt5   | 15 | 0 | 0  | 6    | 6    |
| Ni2-Mo8-Pt6   | 16 | 0 | 0  | 2    | 2    |
| Ni2-Mo9-Pt4   | 15 | 0 | 0  | 2    | 2    |
| Ni2-Mo9-Pt5   | 16 | 0 | 0  | 3    | 3    |
| Ni2-Mo10-Pt3  | 15 | 0 | 0  | 2    | 2    |
| Ni2-Mo10-Pt4  | 16 | 0 | 0  | 3    | 3    |
| Ni2-Mo10-Pt20 | 32 | 0 | 55 | 45   | 100  |
| Ni2-Mo10-Pt36 | 48 | 0 | 0  | 19   | 19   |
| Ni2-Mo11-Pt3  | 16 | 0 | 0  | 4    | 4    |
| Ni2-Mo12-Pt2  | 16 | 0 | 1  | 7    | 8    |
| Ni2-Mo13      | 15 | 0 | 0  | 33   | 33   |
| Ni2-Mo13-Pt1  | 16 | 0 | 0  | 7    | 7    |
| Ni2-Mo14      | 16 | 0 | 1  | 7    | 8    |
| Ni2-Mo21-Pt9  | 32 | 0 | 0  | 1    | 1    |
| Ni2-Mo22-Pt24 | 48 | 0 | 0  | 10   | 10   |
| Ni2-Mo24-Pt6  | 32 | 0 | 34 | 66   | 100  |
| Ni3-Pt13      | 16 | 0 | 6  | 0    | 6    |
| Ni3-Mo3-Pt18  | 24 | 0 | 0  | 26   | 26   |
| Ni3-Mo7-Pt22  | 32 | 0 | 18 | 22   | 40   |

|               |    |    |     |     |     |
|---------------|----|----|-----|-----|-----|
| Ni3-Mo8-Pt5   | 16 | 0  | 0   | 7   | 7   |
| Ni3-Mo9-Pt4   | 16 | 0  | 0   | 10  | 10  |
| Ni3-Mo9-Pt36  | 48 | 0  | 0   | 13  | 13  |
| Ni3-Mo10-Pt3  | 16 | 0  | 0   | 6   | 6   |
| Ni3-Mo11-Pt2  | 16 | 0  | 0   | 15  | 15  |
| Ni3-Mo12      | 15 | 0  | 0   | 41  | 41  |
| Ni3-Mo12-Pt1  | 16 | 0  | 0   | 6   | 6   |
| Ni3-Mo12-Pt17 | 32 | 0  | 0   | 1   | 1   |
| Ni3-Mo13      | 16 | 0  | 0   | 12  | 12  |
| Ni3-Mo13-Pt16 | 32 | 0  | 0   | 1   | 1   |
| Ni3-Mo16-Pt13 | 32 | 0  | 44  | 46  | 90  |
| Ni3-Mo21-Pt8  | 32 | 0  | 203 | 309 | 512 |
| Ni3-Mo21-Pt24 | 48 | 0  | 0   | 15  | 15  |
| Ni3-Mo26-Pt3  | 32 | 0  | 0   | 1   | 1   |
| Ni3-Mo26-Pt19 | 48 | 0  | 0   | 11  | 11  |
| Ni4-Mo2-Pt42  | 48 | 0  | 0   | 6   | 6   |
| Ni4-Mo4-Pt8   | 16 | 0  | 0   | 2   | 2   |
| Ni4-Mo5-Pt7   | 16 | 0  | 0   | 2   | 2   |
| Ni4-Mo6-Pt6   | 16 | 0  | 0   | 7   | 7   |
| Ni4-Mo7-Pt5   | 16 | 0  | 0   | 6   | 6   |
| Ni4-Mo8-Pt4   | 16 | 0  | 0   | 10  | 10  |
| Ni4-Mo8-Pt20  | 32 | 0  | 0   | 1   | 1   |
| Ni4-Mo8-Pt36  | 48 | 0  | 0   | 8   | 8   |
| Ni4-Mo9-Pt3   | 16 | 0  | 0   | 5   | 5   |
| Ni4-Mo10-Pt2  | 16 | 0  | 0   | 3   | 3   |
| Ni4-Mo11      | 15 | 0  | 0   | 57  | 57  |
| Ni4-Mo11-Pt1  | 16 | 0  | 0   | 2   | 2   |
| Ni4-Mo12      | 16 | 0  | 0   | 11  | 11  |
| Ni4-Mo20-Pt24 | 48 | 0  | 0   | 12  | 12  |
| Ni4-Mo21-Pt7  | 32 | 0  | 31  | 69  | 100 |
| Ni4-Mo26-Pt34 | 64 | 0  | 6   | 5   | 11  |
| Ni4-Mo30-Pt24 | 58 | 0  | 22  | 8   | 30  |
| Ni4-Mo32-Pt12 | 48 | 0  | 0   | 10  | 10  |
| Ni5-Pt11      | 16 | 10 | 1   | 0   | 11  |
| Ni5-Mo3-Pt8   | 16 | 0  | 0   | 1   | 1   |
| Ni5-Mo4-Pt7   | 16 | 0  | 0   | 6   | 6   |
| Ni5-Mo5-Pt6   | 16 | 0  | 0   | 13  | 13  |
| Ni5-Mo6-Pt5   | 16 | 0  | 0   | 10  | 10  |
| Ni5-Mo7-Pt4   | 16 | 0  | 0   | 7   | 7   |
| Ni5-Mo7-Pt36  | 48 | 0  | 0   | 2   | 2   |
| Ni5-Mo8-Pt3   | 16 | 0  | 0   | 4   | 4   |

|               |    |    |    |    |     |
|---------------|----|----|----|----|-----|
| Ni5-Mo9-Pt2   | 16 | 0  | 0  | 5  | 5   |
| Ni5-Mo9-Pt18  | 32 | 0  | 30 | 23 | 53  |
| Ni5-Mo10      | 15 | 0  | 0  | 49 | 49  |
| Ni5-Mo11      | 16 | 0  | 0  | 8  | 8   |
| Ni5-Mo16-Pt11 | 32 | 0  | 41 | 50 | 91  |
| Ni5-Mo19-Pt8  | 32 | 0  | 47 | 62 | 109 |
| Ni5-Mo19-Pt24 | 48 | 0  | 0  | 16 | 16  |
| Ni5-Mo23-Pt4  | 32 | 0  | 39 | 83 | 122 |
| Ni5-Mo24-Pt3  | 32 | 0  | 1  | 0  | 1   |
| Ni5-Mo24-Pt19 | 48 | 0  | 0  | 14 | 14  |
| Ni6-Pt26      | 32 | 0  | 0  | 8  | 8   |
| Ni6-Pt42      | 48 | 0  | 0  | 9  | 9   |
| Ni6-Mo2-Pt8   | 16 | 0  | 0  | 5  | 5   |
| Ni6-Mo3-Pt7   | 16 | 0  | 0  | 7  | 7   |
| Ni6-Mo4-Pt6   | 16 | 0  | 0  | 3  | 3   |
| Ni6-Mo5-Pt5   | 16 | 0  | 0  | 10 | 10  |
| Ni6-Mo6-Pt4   | 16 | 0  | 0  | 1  | 1   |
| Ni6-Mo6-Pt36  | 48 | 0  | 0  | 8  | 8   |
| Ni6-Mo7-Pt3   | 16 | 0  | 0  | 1  | 1   |
| Ni6-Mo8-Pt2   | 16 | 0  | 0  | 2  | 2   |
| Ni6-Mo9       | 15 | 0  | 0  | 52 | 52  |
| Ni6-Mo10      | 16 | 0  | 0  | 12 | 12  |
| Ni6-Mo16-Pt10 | 32 | 0  | 0  | 1  | 1   |
| Ni6-Mo18-Pt24 | 48 | 0  | 0  | 21 | 21  |
| Ni6-Mo36-Pt6  | 48 | 0  | 0  | 1  | 1   |
| Ni7-Mo1-Pt8   | 16 | 0  | 0  | 11 | 11  |
| Ni7-Mo2-Pt7   | 16 | 0  | 0  | 12 | 12  |
| Ni7-Mo2-Pt23  | 32 | 75 | 0  | 0  | 75  |
| Ni7-Mo2-Pt27  | 36 | 0  | 0  | 35 | 35  |
| Ni7-Mo3-Pt6   | 16 | 0  | 0  | 14 | 14  |
| Ni7-Mo4-Pt5   | 16 | 0  | 0  | 3  | 3   |
| Ni7-Mo5-Pt4   | 16 | 0  | 0  | 4  | 4   |
| Ni7-Mo5-Pt20  | 32 | 0  | 16 | 44 | 60  |
| Ni7-Mo5-Pt36  | 48 | 0  | 0  | 3  | 3   |
| Ni7-Mo6-Pt3   | 16 | 0  | 0  | 3  | 3   |
| Ni7-Mo8       | 15 | 0  | 0  | 46 | 46  |
| Ni7-Mo9       | 16 | 0  | 0  | 6  | 6   |
| Ni7-Mo15-Pt10 | 32 | 0  | 31 | 50 | 81  |
| Ni7-Mo17-Pt24 | 48 | 0  | 0  | 8  | 8   |
| Ni7-Mo19-Pt6  | 32 | 0  | 0  | 1  | 1   |
| Ni7-Mo22-Pt19 | 48 | 0  | 0  | 20 | 20  |



|                |    |     |     |      |      |
|----------------|----|-----|-----|------|------|
| Ni8-Pt8        | 16 | 0   | 5   | 1403 | 1408 |
| Ni8-Mo1-Pt7    | 16 | 0   | 0   | 11   | 11   |
| Ni8-Mo1-Pt23   | 32 | 0   | 21  | 11   | 32   |
| Ni8-Mo2-Pt6    | 16 | 0   | 0   | 4    | 4    |
| Ni8-Mo2-Pt22   | 32 | 0   | 20  | 12   | 32   |
| Ni8-Mo3-Pt21   | 32 | 28  | 14  | 7    | 49   |
| Ni8-Mo4-Pt4    | 16 | 0   | 0   | 2    | 2    |
| Ni8-Mo7        | 15 | 0   | 0   | 42   | 42   |
| Ni8-Mo7-Pt1    | 16 | 0   | 0   | 1    | 1    |
| Ni8-Mo8        | 16 | 0   | 0   | 11   | 11   |
| Ni8-Mo10-Pt14  | 32 | 0   | 47  | 56   | 103  |
| Ni8-Mo13-Pt11  | 32 | 0   | 72  | 63   | 135  |
| Ni8-Mo14-Pt7   | 29 | 0   | 103 | 138  | 241  |
| Ni8-Mo14-Pt10  | 32 | 0   | 0   | 1    | 1    |
| Ni8-Mo16-Pt8   | 32 | 0   | 58  | 70   | 128  |
| Ni8-Mo16-Pt24  | 48 | 0   | 0   | 4    | 4    |
| Ni8-Mo18-Pt6   | 32 | 0   | 37  | 63   | 100  |
| Ni8-Mo28-Pt12  | 48 | 0   | 0   | 9    | 9    |
| Ni9-Mo2-Pt53   | 64 | 0   | 2   | 0    | 2    |
| Ni9-Mo2-Pt54   | 65 | 0   | 1   | 0    | 1    |
| Ni9-Mo3-Pt36   | 48 | 0   | 0   | 2    | 2    |
| Ni9-Mo4-Pt19   | 32 | 0   | 1   | 0    | 1    |
| Ni9-Mo6        | 15 | 0   | 0   | 48   | 48   |
| Ni9-Mo7        | 16 | 0   | 0   | 4    | 4    |
| Ni9-Mo15-Pt4   | 28 | 0   | 1   | 0    | 1    |
| Ni9-Mo15-Pt24  | 48 | 0   | 0   | 8    | 8    |
| Ni9-Mo20-Pt19  | 48 | 0   | 0   | 15   | 15   |
| Ni9-Mo23       | 32 | 0   | 71  | 128  | 199  |
| Ni10-Mo2-Pt36  | 48 | 0   | 0   | 8    | 8    |
| Ni10-Mo2-Pt60  | 72 | 0   | 8   | 0    | 8    |
| Ni10-Mo2-Pt61  | 73 | 0   | 3   | 0    | 3    |
| Ni10-Mo5       | 15 | 0   | 0   | 50   | 50   |
| Ni10-Mo5-Pt17  | 32 | 190 | 0   | 0    | 190  |
| Ni10-Mo6       | 16 | 0   | 0   | 10   | 10   |
| Ni10-Mo6-Pt15  | 31 | 24  | 0   | 0    | 24   |
| Ni10-Mo6-Pt16  | 32 | 204 | 0   | 0    | 204  |
| Ni10-Mo12-Pt7  | 29 | 0   | 1   | 0    | 1    |
| Ni10-Mo14-Pt24 | 48 | 0   | 0   | 8    | 8    |
| Ni10-Mo38-Pt16 | 64 | 0   | 4   | 10   | 14   |
| Ni11-Pt21      | 32 | 0   | 5   | 6    | 11   |
| Ni11-Mo1-Pt36  | 48 | 0   | 0   | 2    | 2    |

|                |    |   |     |      |      |
|----------------|----|---|-----|------|------|
| Ni11-Mo4       | 15 | 0 | 0   | 41   | 41   |
| Ni11-Mo4-Pt17  | 32 | 0 | 1   | 0    | 1    |
| Ni11-Mo5       | 16 | 0 | 0   | 10   | 10   |
| Ni11-Mo13-Pt24 | 48 | 0 | 0   | 7    | 7    |
| Ni11-Mo18-Pt19 | 48 | 0 | 0   | 22   | 22   |
| Ni12-Pt4       | 16 | 0 | 2   | 0    | 2    |
| Ni12-Mo3       | 15 | 0 | 0   | 48   | 48   |
| Ni12-Mo4       | 16 | 0 | 0   | 6    | 6    |
| Ni12-Mo7-Pt13  | 32 | 0 | 1   | 0    | 1    |
| Ni12-Mo8-Pt12  | 32 | 0 | 0   | 1    | 1    |
| Ni12-Mo12-Pt24 | 48 | 0 | 0   | 5    | 5    |
| Ni12-Mo24-Pt12 | 48 | 0 | 0   | 8    | 8    |
| Ni12-Mo30-Pt6  | 48 | 0 | 0   | 15   | 15   |
| Ni13-Pt3       | 16 | 0 | 0   | 5    | 5    |
| Ni13-Mo1-Pt18  | 32 | 0 | 189 | 104  | 293  |
| Ni13-Mo2       | 15 | 0 | 0   | 41   | 41   |
| Ni13-Mo3       | 16 | 0 | 0   | 9    | 9    |
| Ni13-Mo11-Pt24 | 48 | 0 | 0   | 9    | 9    |
| Ni14-Pt14      | 28 | 0 | 10  | 0    | 10   |
| Ni14-Pt15      | 29 | 0 | 12  | 0    | 12   |
| Ni14-Pt18      | 32 | 0 | 6   | 1    | 7    |
| Ni14-Mo1       | 15 | 0 | 0   | 29   | 29   |
| Ni14-Mo2       | 16 | 0 | 0   | 5    | 5    |
| Ni14-Mo2-Pt48  | 64 | 0 | 1   | 0    | 1    |
| Ni14-Mo6-Pt44  | 64 | 0 | 6   | 6    | 12   |
| Ni14-Mo10-Pt8  | 32 | 0 | 185 | 134  | 319  |
| Ni14-Mo10-Pt24 | 48 | 0 | 0   | 2    | 2    |
| Ni15           | 15 | 0 | 0   | 2695 | 2695 |
| Ni15-Pt1       | 16 | 0 | 7   | 17   | 24   |
| Ni15-Mo1       | 16 | 0 | 0   | 5    | 5    |
| Ni15-Mo2-Pt15  | 32 | 0 | 0   | 2    | 2    |
| Ni15-Mo9-Pt24  | 48 | 0 | 0   | 11   | 11   |
| Ni15-Mo14-Pt19 | 48 | 0 | 0   | 8    | 8    |
| Ni15-Mo16-Pt1  | 32 | 0 | 35  | 59   | 94   |
| Ni16           | 16 | 0 | 0   | 507  | 507  |
| Ni16-Pt16      | 32 | 0 | 3   | 63   | 66   |
| Ni16-Mo2-Pt54  | 72 | 0 | 1   | 0    | 1    |
| Ni16-Mo8-Pt8   | 32 | 0 | 103 | 121  | 224  |
| Ni16-Mo8-Pt24  | 48 | 0 | 0   | 2    | 2    |
| Ni16-Mo14-Pt2  | 32 | 0 | 50  | 77   | 127  |
| Ni16-Mo20-Pt12 | 48 | 0 | 0   | 4    | 4    |

|                |    |     |     |     |     |
|----------------|----|-----|-----|-----|-----|
| Ni17-Pt15      | 32 | 0   | 3   | 0   | 3   |
| Ni17-Mo7-Pt24  | 48 | 0   | 0   | 13  | 13  |
| Ni17-Mo12-Pt19 | 48 | 0   | 0   | 7   | 7   |
| Ni18-Pt54      | 72 | 0   | 1   | 0   | 1   |
| Ni18-Mo1-Pt13  | 32 | 0   | 47  | 45  | 92  |
| Ni18-Mo6-Pt24  | 48 | 0   | 0   | 5   | 5   |
| Ni18-Mo14      | 32 | 0   | 101 | 119 | 220 |
| Ni19-Mo5-Pt24  | 48 | 0   | 0   | 2   | 2   |
| Ni19-Mo9-Pt20  | 48 | 0   | 0   | 8   | 8   |
| Ni19-Mo10-Pt19 | 48 | 0   | 0   | 6   | 6   |
| Ni19-Mo13      | 32 | 0   | 88  | 45  | 133 |
| Ni20-Mo4-Pt24  | 48 | 0   | 0   | 5   | 5   |
| Ni20-Mo8-Pt20  | 48 | 0   | 0   | 4   | 4   |
| Ni20-Mo9-Pt19  | 48 | 0   | 0   | 4   | 4   |
| Ni20-Mo10-Pt18 | 48 | 0   | 0   | 7   | 7   |
| Ni20-Mo16-Pt12 | 48 | 0   | 0   | 7   | 7   |
| Ni21-Mo3-Pt24  | 48 | 0   | 0   | 4   | 4   |
| Ni22-Mo7-Pt19  | 48 | 0   | 0   | 24  | 24  |
| Ni22-Mo8-Pt18  | 48 | 0   | 0   | 10  | 10  |
| Ni23-Mo1-Pt24  | 48 | 0   | 0   | 20  | 20  |
| Ni23-Mo4-Pt4   | 31 | 16  | 0   | 0   | 16  |
| Ni23-Mo6-Pt19  | 48 | 0   | 0   | 3   | 3   |
| Ni24-Mo3-Pt5   | 32 | 85  | 0   | 0   | 85  |
| Ni24-Mo4-Pt4   | 32 | 104 | 0   | 0   | 104 |
| Ni24-Mo12-Pt12 | 48 | 0   | 0   | 1   | 1   |
| Ni24-Mo18-Pt6  | 48 | 0   | 0   | 5   | 5   |
| Ni25-Mo4-Pt19  | 48 | 0   | 0   | 4   | 4   |
| Ni27-Mo2-Pt19  | 48 | 0   | 0   | 4   | 4   |
| Ni28-Mo8-Pt12  | 48 | 0   | 0   | 3   | 3   |
| Ni30-Mo12-Pt6  | 48 | 0   | 0   | 1   | 1   |
| Ni30-Mo32-Pt2  | 64 | 0   | 1   | 7   | 8   |
| Ni32-Mo28-Pt4  | 64 | 0   | 2   | 2   | 4   |
| Ni36-Pt12      | 48 | 0   | 0   | 2   | 2   |
| Ni36-Mo6-Pt6   | 48 | 0   | 0   | 4   | 4   |
| Ni36-Mo28      | 64 | 0   | 5   | 11  | 16  |
| Ni42-Pt6       | 48 | 0   | 0   | 1   | 1   |
| O1-Pt12        | 13 | 0   | 175 | 0   | 175 |
| O1-Mo1-Pt11    | 13 | 0   | 3   | 0   | 3   |
| O1-Mo2-Pt10    | 13 | 0   | 7   | 0   | 7   |
| O1-Mo3-Pt9     | 13 | 0   | 3   | 0   | 3   |
| O1-Mo4-Pt8     | 13 | 0   | 3   | 0   | 3   |

|                  |    |    |    |    |    |
|------------------|----|----|----|----|----|
| O1-Mo5-Pt7       | 13 | 0  | 5  | 0  | 5  |
| O1-Mo6-Pt6       | 13 | 0  | 6  | 0  | 6  |
| O1-Mo6-Pt18      | 25 | 0  | 0  | 20 | 20 |
| O1-Mo7-Pt5       | 13 | 0  | 3  | 0  | 3  |
| O1-Mo8-Pt4       | 13 | 0  | 7  | 0  | 7  |
| O1-Mo8-Pt23      | 32 | 0  | 20 | 15 | 35 |
| O1-Mo9-Pt3       | 13 | 0  | 1  | 0  | 1  |
| O1-Mo10-Pt2      | 13 | 0  | 3  | 0  | 3  |
| O1-Mo11-Pt1      | 13 | 0  | 7  | 0  | 7  |
| O1-Ni1-Pt11      | 13 | 0  | 1  | 0  | 1  |
| O1-Ni1-Mo13-Pt17 | 32 | 0  | 26 | 16 | 42 |
| O1-Ni1-Mo15      | 17 | 0  | 2  | 0  | 2  |
| O1-Ni2-Pt10      | 13 | 0  | 4  | 0  | 4  |
| O1-Ni3           | 4  | 0  | 5  | 11 | 16 |
| O1-Ni3-Pt9       | 13 | 0  | 3  | 0  | 3  |
| O1-Ni3-Pt13      | 17 | 0  | 1  | 0  | 1  |
| O1-Ni3-Mo3-Pt18  | 25 | 0  | 0  | 23 | 23 |
| O1-Ni3-Mo11-Pt17 | 32 | 0  | 8  | 7  | 15 |
| O1-Ni3-Mo13      | 17 | 0  | 1  | 0  | 1  |
| O1-Ni4-Pt8       | 13 | 0  | 1  | 0  | 1  |
| O1-Ni4-Pt12      | 17 | 0  | 1  | 0  | 1  |
| O1-Ni5-Pt11      | 17 | 0  | 3  | 0  | 3  |
| O1-Ni5-Mo11      | 17 | 0  | 3  | 0  | 3  |
| O1-Ni6-Pt10      | 17 | 0  | 1  | 0  | 1  |
| O1-Ni6-Mo2-Pt23  | 32 | 0  | 10 | 8  | 18 |
| O1-Ni6-Mo3-Pt22  | 32 | 0  | 21 | 14 | 35 |
| O1-Ni6-Mo9-Pt15  | 31 | 43 | 0  | 0  | 43 |
| O1-Ni6-Mo10      | 17 | 0  | 1  | 0  | 1  |
| O1-Ni6-Mo19-Pt6  | 32 | 0  | 9  | 12 | 21 |
| O1-Ni7-Pt5       | 13 | 0  | 1  | 0  | 1  |
| O1-Ni7-Pt9       | 17 | 0  | 2  | 0  | 2  |
| O1-Ni7-Mo9       | 17 | 0  | 3  | 0  | 3  |
| O1-Ni8-Mo8       | 17 | 0  | 2  | 0  | 2  |
| O1-Ni9-Mo2-Pt53  | 65 | 0  | 5  | 0  | 5  |
| O1-Ni9-Mo7       | 17 | 0  | 3  | 0  | 3  |
| O1-Ni10-Pt6      | 17 | 0  | 1  | 0  | 1  |
| O1-Ni10-Mo2-Pt60 | 73 | 0  | 15 | 0  | 15 |
| O1-Ni10-Mo2-Pt61 | 74 | 0  | 1  | 0  | 1  |
| O1-Ni10-Mo5-Pt15 | 31 | 75 | 0  | 0  | 75 |
| O1-Ni10-Mo6      | 17 | 0  | 3  | 0  | 3  |
| O1-Ni11-Pt5      | 17 | 0  | 1  | 0  | 1  |

|                  |    |    |     |    |     |
|------------------|----|----|-----|----|-----|
| O1-Ni11-Pt20     | 32 | 0  | 7   | 8  | 15  |
| O1-Ni11-Mo2-Pt17 | 31 | 24 | 0   | 0  | 24  |
| O1-Ni11-Mo5      | 17 | 0  | 5   | 0  | 5   |
| O1-Ni11-Mo8-Pt12 | 32 | 0  | 18  | 15 | 33  |
| O1-Ni12-Mo4      | 17 | 0  | 2   | 0  | 2   |
| O1-Ni13-Mo1-Pt17 | 32 | 0  | 16  | 14 | 30  |
| O1-Ni13-Mo2-Pt49 | 65 | 0  | 1   | 0  | 1   |
| O1-Ni13-Mo3      | 17 | 0  | 5   | 0  | 5   |
| O1-Ni14-Mo2      | 17 | 0  | 3   | 0  | 3   |
| O1-Ni15          | 16 | 0  | 1   | 4  | 5   |
| O1-Ni15-Mo1      | 17 | 0  | 3   | 0  | 3   |
| O1-Ni16-Mo2-Pt54 | 73 | 0  | 3   | 0  | 3   |
| O1-Ni18-Pt54     | 73 | 0  | 1   | 0  | 1   |
| O1-Ni23-Mo3-Pt4  | 31 | 43 | 0   | 0  | 43  |
| O2-Pt10          | 12 | 0  | 161 | 0  | 161 |
| O2-Mo1-Pt9       | 12 | 0  | 8   | 0  | 8   |
| O2-Mo2-Pt8       | 12 | 0  | 11  | 0  | 11  |
| O2-Mo3-Pt7       | 12 | 0  | 4   | 0  | 4   |
| O2-Mo4-Pt6       | 12 | 0  | 4   | 0  | 4   |
| O2-Mo5-Pt5       | 12 | 0  | 4   | 0  | 4   |
| O2-Mo6-Pt4       | 12 | 0  | 5   | 0  | 5   |
| O2-Mo7-Pt3       | 12 | 0  | 3   | 0  | 3   |
| O2-Mo8-Pt2       | 12 | 0  | 5   | 0  | 5   |
| O2-Mo9-Pt1       | 12 | 0  | 7   | 0  | 7   |
| O2-Mo21-Pt9      | 32 | 0  | 52  | 32 | 84  |
| O2-Ni1-Pt9       | 12 | 0  | 2   | 0  | 2   |
| O2-Ni2-Pt8       | 12 | 0  | 3   | 0  | 3   |
| O2-Ni2-Mo11-Pt17 | 32 | 0  | 3   | 4  | 7   |
| O2-Ni2-Mo13-Pt12 | 29 | 0  | 43  | 43 | 86  |
| O2-Ni2-Mo14      | 18 | 0  | 0   | 1  | 1   |
| O2-Ni2-Mo21-Pt7  | 32 | 0  | 6   | 6  | 12  |
| O2-Ni3-Pt7       | 12 | 0  | 3   | 0  | 3   |
| O2-Ni3-Mo13      | 18 | 0  | 0   | 1  | 1   |
| O2-Ni5-Pt11      | 18 | 0  | 0   | 1  | 1   |
| O2-Ni5-Mo2-Pt23  | 32 | 0  | 5   | 4  | 9   |
| O2-Ni5-Mo11      | 18 | 0  | 0   | 2  | 2   |
| O2-Ni6-Mo9-Pt12  | 29 | 0  | 26  | 20 | 46  |
| O2-Ni7-Pt9       | 18 | 0  | 0   | 1  | 1   |
| O2-Ni7-Mo25      | 34 | 0  | 2   | 0  | 2   |
| O2-Ni8-Pt8       | 18 | 0  | 0   | 1  | 1   |
| O2-Ni8-Mo8       | 18 | 0  | 0   | 4  | 4   |

|                  |    |    |    |    |    |
|------------------|----|----|----|----|----|
| O2-Ni8-Mo13-Pt9  | 32 | 0  | 30 | 19 | 49 |
| O2-Ni9-Pt7       | 18 | 0  | 0  | 1  | 1  |
| O2-Ni9-Mo2-Pt53  | 66 | 0  | 3  | 0  | 3  |
| O2-Ni9-Mo2-Pt54  | 67 | 0  | 2  | 0  | 2  |
| O2-Ni10-Pt20     | 32 | 0  | 2  | 0  | 2  |
| O2-Ni10-Pt22     | 34 | 0  | 1  | 0  | 1  |
| O2-Ni10-Mo2-Pt60 | 74 | 0  | 3  | 0  | 3  |
| O2-Ni10-Mo2-Pt61 | 75 | 0  | 1  | 0  | 1  |
| O2-Ni10-Mo6      | 18 | 0  | 0  | 2  | 2  |
| O2-Ni11-Mo5      | 18 | 0  | 0  | 1  | 1  |
| O2-Ni12-Mo4      | 18 | 0  | 0  | 1  | 1  |
| O2-Ni13-Pt19     | 34 | 0  | 2  | 0  | 2  |
| O2-Ni13-Mo2-Pt49 | 66 | 0  | 1  | 0  | 1  |
| O2-Ni13-Mo3      | 18 | 0  | 0  | 1  | 1  |
| O2-Ni14          | 16 | 0  | 4  | 7  | 11 |
| O2-Ni14-Mo2      | 18 | 0  | 0  | 2  | 2  |
| O2-Ni14-Mo9-Pt7  | 32 | 0  | 12 | 15 | 27 |
| O2-Ni15-Pt17     | 34 | 0  | 1  | 0  | 1  |
| O2-Ni15-Mo1      | 18 | 0  | 0  | 5  | 5  |
| O2-Ni15-Mo13-Pt2 | 32 | 0  | 17 | 27 | 44 |
| O2-Ni15-Mo14-Pt1 | 32 | 0  | 32 | 53 | 85 |
| O2-Ni16-Mo2-Pt54 | 74 | 0  | 8  | 0  | 8  |
| O2-Ni16-Mo2-Pt55 | 75 | 0  | 2  | 0  | 2  |
| O2-Ni16-Mo9-Pt2  | 29 | 0  | 18 | 25 | 43 |
| O2-Ni18-Pt54     | 74 | 0  | 1  | 0  | 1  |
| O2-Ni20-Mo12     | 34 | 0  | 1  | 0  | 1  |
| O2-Ni22-Mo10     | 34 | 0  | 1  | 0  | 1  |
| O2-Ni25-Mo7      | 34 | 0  | 1  | 0  | 1  |
| O2-Ni28-Mo4      | 34 | 0  | 1  | 0  | 1  |
| O2-Ni29-Mo3      | 34 | 0  | 1  | 0  | 1  |
| O3-Pt16          | 19 | 24 | 0  | 0  | 24 |
| O3-Mo1-Pt15      | 19 | 1  | 0  | 0  | 1  |
| O3-Mo2-Pt14      | 19 | 3  | 0  | 0  | 3  |
| O3-Mo3-Pt13      | 19 | 1  | 0  | 0  | 1  |
| O3-Mo5-Pt11      | 19 | 1  | 0  | 0  | 1  |
| O3-Mo7-Pt9       | 19 | 1  | 0  | 0  | 1  |
| O3-Mo9-Pt7       | 19 | 2  | 0  | 0  | 2  |
| O3-Mo13-Pt3      | 19 | 3  | 0  | 0  | 3  |
| O3-Ni2-Mo19-Pt8  | 32 | 0  | 16 | 22 | 38 |
| O3-Ni2-Mo21-Pt6  | 32 | 0  | 2  | 7  | 9  |
| O3-Ni3-Mo19-Pt7  | 32 | 0  | 4  | 13 | 17 |

|                  |    |   |    |      |      |
|------------------|----|---|----|------|------|
| O3-Ni4-Mo2-Pt23  | 32 | 0 | 11 | 18   | 29   |
| O3-Ni5-Pt11      | 19 | 1 | 0  | 0    | 1    |
| O3-Ni9-Mo2-Pt53  | 67 | 0 | 1  | 0    | 1    |
| O3-Ni9-Mo2-Pt54  | 68 | 0 | 1  | 0    | 1    |
| O3-Ni9-Mo2-Pt55  | 69 | 0 | 1  | 0    | 1    |
| O3-Ni10-Mo2-Pt60 | 75 | 0 | 2  | 0    | 2    |
| O3-Ni10-Mo2-Pt61 | 76 | 0 | 1  | 0    | 1    |
| O3-Ni10-Mo2-Pt62 | 77 | 0 | 8  | 0    | 8    |
| O3-Ni13-Mo2-Pt49 | 67 | 0 | 1  | 0    | 1    |
| O3-Ni13-Mo2-Pt50 | 68 | 0 | 1  | 0    | 1    |
| O3-Ni13-Mo14-Pt2 | 32 | 0 | 24 | 15   | 39   |
| O3-Ni14-Mo13-Pt2 | 32 | 0 | 9  | 8    | 17   |
| O3-Ni15-Mo9-Pt2  | 29 | 0 | 6  | 9    | 15   |
| O3-Ni16-Mo2-Pt54 | 75 | 0 | 1  | 0    | 1    |
| O3-Ni16-Mo2-Pt55 | 76 | 0 | 1  | 0    | 1    |
| O3-Ni18-Mo4-Pt7  | 32 | 0 | 20 | 15   | 35   |
| O3-Ni18-Mo11     | 32 | 0 | 58 | 46   | 104  |
| O4-Pt8           | 12 | 0 | 0  | 4604 | 4604 |
| O4-Pt27          | 31 | 0 | 0  | 116  | 116  |
| O4-Mo1-Pt7       | 12 | 0 | 0  | 215  | 215  |
| O4-Mo1-Pt26      | 31 | 0 | 0  | 2    | 2    |
| O4-Mo2-Pt6       | 12 | 0 | 0  | 173  | 173  |
| O4-Mo2-Pt25      | 31 | 0 | 0  | 6    | 6    |
| O4-Mo3-Pt5       | 12 | 0 | 0  | 170  | 170  |
| O4-Mo3-Pt24      | 31 | 0 | 0  | 3    | 3    |
| O4-Mo4-Pt4       | 12 | 0 | 0  | 187  | 187  |
| O4-Mo5-Pt3       | 12 | 0 | 0  | 179  | 179  |
| O4-Mo5-Pt22      | 31 | 0 | 0  | 1    | 1    |
| O4-Mo6-Pt2       | 12 | 0 | 0  | 198  | 198  |
| O4-Mo6-Pt21      | 31 | 0 | 0  | 1    | 1    |
| O4-Mo7-Pt1       | 12 | 0 | 0  | 211  | 211  |
| O4-Mo7-Pt20      | 31 | 0 | 0  | 1    | 1    |
| O4-Mo8-Pt19      | 31 | 0 | 0  | 2    | 2    |
| O4-Mo9-Pt18      | 31 | 0 | 0  | 1    | 1    |
| O4-Mo10-Pt17     | 31 | 0 | 0  | 2    | 2    |
| O4-Mo11-Pt16     | 31 | 0 | 0  | 3    | 3    |
| O4-Mo13-Pt14     | 31 | 0 | 0  | 3    | 3    |
| O4-Mo14-Pt13     | 31 | 0 | 0  | 1    | 1    |
| O4-Mo16-Pt11     | 31 | 0 | 0  | 3    | 3    |
| O4-Mo18-Pt9      | 31 | 0 | 0  | 1    | 1    |
| O4-Mo19-Pt8      | 31 | 0 | 0  | 3    | 3    |

|                  |    |   |    |     |     |
|------------------|----|---|----|-----|-----|
| O4-Mo20-Pt7      | 31 | 0 | 0  | 1   | 1   |
| O4-Mo21-Pt6      | 31 | 0 | 0  | 1   | 1   |
| O4-Mo22-Pt5      | 31 | 0 | 0  | 1   | 1   |
| O4-Mo23-Pt4      | 31 | 0 | 0  | 2   | 2   |
| O4-Mo24-Pt3      | 31 | 0 | 0  | 3   | 3   |
| O4-Mo25-Pt2      | 31 | 0 | 0  | 4   | 4   |
| O4-Mo26-Pt1      | 31 | 0 | 0  | 2   | 2   |
| O4-Ni1-Pt7       | 12 | 0 | 0  | 144 | 144 |
| O4-Ni2-Pt6       | 12 | 0 | 0  | 111 | 111 |
| O4-Ni2-Pt25      | 31 | 0 | 0  | 2   | 2   |
| O4-Ni2-Mo30      | 36 | 0 | 1  | 0   | 1   |
| O4-Ni3-Pt5       | 12 | 0 | 0  | 58  | 58  |
| O4-Ni3-Pt24      | 31 | 0 | 0  | 1   | 1   |
| O4-Ni3-Mo19-Pt6  | 32 | 0 | 26 | 12  | 38  |
| O4-Ni4-Pt4       | 12 | 0 | 0  | 28  | 28  |
| O4-Ni4-Pt23      | 31 | 0 | 0  | 3   | 3   |
| O4-Ni4-Mo22-Pt34 | 64 | 0 | 17 | 13  | 30  |
| O4-Ni5-Pt3       | 12 | 0 | 0  | 1   | 1   |
| O4-Ni5-Pt22      | 31 | 0 | 0  | 2   | 2   |
| O4-Ni5-Mo27      | 36 | 0 | 1  | 0   | 1   |
| O4-Ni6-Pt21      | 31 | 0 | 0  | 5   | 5   |
| O4-Ni9-Mo2-Pt53  | 68 | 0 | 2  | 0   | 2   |
| O4-Ni9-Mo2-Pt54  | 69 | 0 | 2  | 0   | 2   |
| O4-Ni9-Mo2-Pt55  | 70 | 0 | 2  | 0   | 2   |
| O4-Ni9-Mo2-Pt56  | 71 | 0 | 1  | 0   | 1   |
| O4-Ni9-Mo23      | 36 | 0 | 1  | 0   | 1   |
| O4-Ni10-Pt17     | 31 | 0 | 0  | 1   | 1   |
| O4-Ni10-Mo2-Pt60 | 76 | 0 | 3  | 0   | 3   |
| O4-Ni10-Mo2-Pt61 | 77 | 0 | 10 | 0   | 10  |
| O4-Ni10-Mo2-Pt62 | 78 | 0 | 2  | 0   | 2   |
| O4-Ni10-Mo2-Pt63 | 79 | 0 | 1  | 0   | 1   |
| O4-Ni10-Mo4-Pt46 | 64 | 0 | 20 | 2   | 22  |
| O4-Ni12-Mo10-Pt6 | 32 | 0 | 3  | 6   | 9   |
| O4-Ni13-Mo2-Pt49 | 68 | 0 | 1  | 0   | 1   |
| O4-Ni13-Mo2-Pt50 | 69 | 0 | 1  | 0   | 1   |
| O4-Ni16-Mo2-Pt54 | 76 | 0 | 2  | 0   | 2   |
| O4-Ni16-Mo2-Pt55 | 77 | 0 | 7  | 0   | 7   |
| O4-Ni16-Mo2-Pt56 | 78 | 0 | 1  | 0   | 1   |
| O4-Ni17-Mo1-Pt52 | 74 | 0 | 89 | 0   | 89  |
| O4-Ni17-Mo15     | 36 | 0 | 1  | 0   | 1   |
| O4-Ni18-Pt54     | 76 | 0 | 1  | 0   | 1   |



|                   |     |   |    |     |     |
|-------------------|-----|---|----|-----|-----|
| O4-Ni18-Mo22-Pt20 | 64  | 0 | 5  | 6   | 11  |
| O4-Ni20-Pt40      | 64  | 0 | 10 | 15  | 25  |
| O4-Ni22-Mo10      | 36  | 0 | 1  | 0   | 1   |
| O4-Ni28-Mo4       | 36  | 0 | 1  | 0   | 1   |
| O4-Ni36-Mo6-Pt18  | 64  | 0 | 10 | 7   | 17  |
| O4-Ni43-Mo2-Pt133 | 182 | 0 | 85 | 0   | 85  |
| O4-Ni44-Pt16      | 64  | 0 | 4  | 2   | 6   |
| O5-Ni2-Mo29       | 36  | 0 | 1  | 0   | 1   |
| O5-Ni3-Mo28       | 36  | 0 | 1  | 0   | 1   |
| O5-Ni8-Pt23       | 36  | 0 | 1  | 0   | 1   |
| O5-Ni9-Mo2-Pt53   | 69  | 0 | 1  | 0   | 1   |
| O5-Ni9-Mo2-Pt54   | 70  | 0 | 3  | 0   | 3   |
| O5-Ni9-Mo2-Pt55   | 71  | 0 | 2  | 0   | 2   |
| O5-Ni9-Mo2-Pt56   | 72  | 0 | 1  | 0   | 1   |
| O5-Ni10-Mo2-Pt60  | 77  | 0 | 13 | 0   | 13  |
| O5-Ni10-Mo2-Pt61  | 78  | 0 | 8  | 0   | 8   |
| O5-Ni10-Mo2-Pt62  | 79  | 0 | 9  | 0   | 9   |
| O5-Ni10-Mo2-Pt63  | 80  | 0 | 1  | 0   | 1   |
| O5-Ni13-Pt18      | 36  | 0 | 1  | 0   | 1   |
| O5-Ni13-Mo2-Pt50  | 70  | 0 | 1  | 0   | 1   |
| O5-Ni16-Pt15      | 36  | 0 | 1  | 0   | 1   |
| O5-Ni16-Mo2-Pt54  | 77  | 0 | 1  | 0   | 1   |
| O5-Ni16-Mo2-Pt55  | 78  | 0 | 2  | 0   | 2   |
| O5-Ni16-Mo2-Pt56  | 79  | 0 | 1  | 0   | 1   |
| O5-Ni16-Mo2-Pt57  | 80  | 0 | 1  | 0   | 1   |
| O5-Ni18-Pt54      | 77  | 0 | 1  | 0   | 1   |
| O5-Ni22-Mo9       | 36  | 0 | 1  | 0   | 1   |
| O5-Ni29-Mo2       | 36  | 0 | 1  | 0   | 1   |
| O5-Ni30-Mo1       | 36  | 0 | 1  | 0   | 1   |
| O6-Pt4            | 10  | 0 | 65 | 214 | 279 |
| O6-Pt26           | 32  | 0 | 0  | 97  | 97  |
| O6-Mo1-Pt25       | 32  | 0 | 0  | 2   | 2   |
| O6-Mo2-Pt24       | 32  | 0 | 0  | 3   | 3   |
| O6-Mo3-Pt23       | 32  | 0 | 0  | 7   | 7   |
| O6-Mo5-Pt21       | 32  | 0 | 0  | 2   | 2   |
| O6-Mo7-Pt19       | 32  | 0 | 0  | 3   | 3   |
| O6-Mo9-Pt17       | 32  | 0 | 0  | 3   | 3   |
| O6-Mo10-Pt16      | 32  | 0 | 0  | 2   | 2   |
| O6-Mo11-Pt15      | 32  | 0 | 0  | 3   | 3   |
| O6-Mo12-Pt14      | 32  | 0 | 0  | 3   | 3   |
| O6-Mo13-Pt13      | 32  | 0 | 0  | 2   | 2   |

|                   |    |    |    |    |    |
|-------------------|----|----|----|----|----|
| O6-Mo14-Pt12      | 32 | 0  | 0  | 5  | 5  |
| O6-Mo15-Pt11      | 32 | 0  | 0  | 3  | 3  |
| O6-Mo16-Pt10      | 32 | 0  | 0  | 1  | 1  |
| O6-Mo17-Pt9       | 32 | 0  | 0  | 3  | 3  |
| O6-Mo18-Pt8       | 32 | 0  | 0  | 3  | 3  |
| O6-Mo19-Pt7       | 32 | 0  | 0  | 4  | 4  |
| O6-Mo20-Pt6       | 32 | 0  | 0  | 2  | 2  |
| O6-Mo22-Pt4       | 32 | 0  | 0  | 2  | 2  |
| O6-Mo23-Pt3       | 32 | 0  | 0  | 3  | 3  |
| O6-Mo24-Pt2       | 32 | 0  | 0  | 3  | 3  |
| O6-Mo25-Pt1       | 32 | 0  | 0  | 1  | 1  |
| O6-Ni2-Pt24       | 32 | 0  | 0  | 1  | 1  |
| O6-Ni3-Mo6-Pt16   | 31 | 13 | 0  | 0  | 13 |
| O6-Ni4-Pt22       | 32 | 0  | 0  | 1  | 1  |
| O6-Ni4-Mo42-Pt12  | 64 | 0  | 14 | 15 | 29 |
| O6-Ni5-Pt21       | 32 | 0  | 0  | 2  | 2  |
| O6-Ni6-Pt20       | 32 | 0  | 0  | 4  | 4  |
| O6-Ni7-Pt19       | 32 | 0  | 0  | 2  | 2  |
| O6-Ni8-Pt18       | 32 | 0  | 0  | 1  | 1  |
| O6-Ni9-Mo2-Pt53   | 70 | 0  | 1  | 0  | 1  |
| O6-Ni9-Mo2-Pt54   | 71 | 0  | 2  | 0  | 2  |
| O6-Ni9-Mo2-Pt55   | 72 | 0  | 2  | 0  | 2  |
| O6-Ni9-Mo2-Pt56   | 73 | 0  | 1  | 0  | 1  |
| O6-Ni9-Mo2-Pt57   | 74 | 0  | 1  | 0  | 1  |
| O6-Ni10-Mo2-Pt60  | 78 | 0  | 6  | 0  | 6  |
| O6-Ni10-Mo2-Pt61  | 79 | 0  | 2  | 0  | 2  |
| O6-Ni10-Mo2-Pt62  | 80 | 0  | 2  | 0  | 2  |
| O6-Ni10-Mo6-Pt36  | 58 | 0  | 9  | 13 | 22 |
| O6-Ni10-Mo14-Pt34 | 64 | 0  | 11 | 1  | 12 |
| O6-Ni11-Mo2-Pt12  | 31 | 19 | 0  | 0  | 19 |
| O6-Ni13-Mo1-Pt11  | 31 | 35 | 0  | 0  | 35 |
| O6-Ni13-Mo2-Pt49  | 70 | 0  | 1  | 0  | 1  |
| O6-Ni13-Mo2-Pt51  | 72 | 0  | 1  | 0  | 1  |
| O6-Ni13-Mo2-Pt52  | 73 | 0  | 1  | 0  | 1  |
| O6-Ni16-Mo2-Pt54  | 78 | 0  | 1  | 0  | 1  |
| O6-Ni16-Mo2-Pt55  | 79 | 0  | 2  | 0  | 2  |
| O6-Ni16-Mo2-Pt56  | 80 | 0  | 1  | 0  | 1  |
| O6-Ni16-Mo2-Pt57  | 81 | 0  | 1  | 0  | 1  |
| O6-Ni18-Pt54      | 78 | 0  | 2  | 0  | 2  |
| O6-Ni26-Mo4-Pt16  | 52 | 0  | 11 | 0  | 11 |
| O6-Ni28-Mo16-Pt14 | 64 | 0  | 14 | 10 | 24 |

|                  |    |    |    |      |      |
|------------------|----|----|----|------|------|
| O6-Ni28-Mo26-Pt4 | 64 | 0  | 30 | 16   | 46   |
| O6-Ni30-Mo18-Pt4 | 58 | 0  | 60 | 37   | 97   |
| O7-Pt8           | 15 | 0  | 0  | 4554 | 4554 |
| O7-Ni9-Mo2-Pt53  | 71 | 0  | 1  | 0    | 1    |
| O7-Ni9-Mo2-Pt54  | 72 | 0  | 3  | 0    | 3    |
| O7-Ni9-Mo2-Pt55  | 73 | 0  | 4  | 0    | 4    |
| O7-Ni9-Mo2-Pt56  | 74 | 0  | 2  | 0    | 2    |
| O7-Ni9-Mo2-Pt57  | 75 | 0  | 2  | 0    | 2    |
| O7-Ni9-Mo2-Pt58  | 76 | 0  | 2  | 0    | 2    |
| O7-Ni9-Mo2-Pt59  | 77 | 0  | 1  | 0    | 1    |
| O7-Ni10-Mo2-Pt60 | 79 | 0  | 1  | 0    | 1    |
| O7-Ni10-Mo2-Pt61 | 80 | 0  | 2  | 0    | 2    |
| O7-Ni10-Mo2-Pt62 | 81 | 0  | 2  | 0    | 2    |
| O7-Ni10-Mo2-Pt63 | 82 | 0  | 3  | 0    | 3    |
| O7-Ni13-Mo2-Pt49 | 71 | 0  | 1  | 0    | 1    |
| O7-Ni13-Mo2-Pt50 | 72 | 0  | 1  | 0    | 1    |
| O7-Ni13-Mo2-Pt51 | 73 | 0  | 1  | 0    | 1    |
| O7-Ni13-Mo2-Pt52 | 74 | 0  | 1  | 0    | 1    |
| O7-Ni13-Mo2-Pt53 | 75 | 0  | 1  | 0    | 1    |
| O7-Ni13-Mo2-Pt54 | 76 | 0  | 1  | 0    | 1    |
| O7-Ni16-Mo2-Pt54 | 79 | 0  | 1  | 0    | 1    |
| O7-Ni16-Mo2-Pt55 | 80 | 0  | 12 | 0    | 12   |
| O7-Ni16-Mo2-Pt56 | 81 | 0  | 1  | 0    | 1    |
| O7-Ni16-Mo2-Pt57 | 82 | 0  | 1  | 0    | 1    |
| O7-Ni18-Pt54     | 79 | 0  | 1  | 0    | 1    |
| O8-Pt6           | 14 | 0  | 19 | 172  | 191  |
| O8-Pt8           | 16 | 42 | 5  | 5704 | 5751 |
| O8-Pt16          | 24 | 26 | 0  | 0    | 26   |
| O8-Mo1-Pt15      | 24 | 1  | 0  | 0    | 1    |
| O8-Mo4-Pt12      | 24 | 1  | 0  | 0    | 1    |
| O8-Mo7-Pt9       | 24 | 1  | 0  | 0    | 1    |
| O8-Mo9-Pt7       | 24 | 2  | 0  | 0    | 2    |
| O8-Mo10-Pt6      | 24 | 1  | 0  | 0    | 1    |
| O8-Mo13-Pt3      | 24 | 2  | 0  | 0    | 2    |
| O8-Mo15-Pt1      | 24 | 1  | 0  | 0    | 1    |
| O8-Mo15-Pt8      | 31 | 81 | 0  | 0    | 81   |
| O8-Ni1-Mo3-Pt19  | 31 | 27 | 0  | 0    | 27   |
| O8-Ni4-Pt12      | 24 | 1  | 0  | 0    | 1    |
| O8-Ni4-Mo2-Pt18  | 32 | 0  | 23 | 9    | 32   |
| O8-Ni6-Pt26      | 40 | 0  | 1  | 0    | 1    |
| O8-Ni6-Mo9-Pt8   | 31 | 36 | 0  | 0    | 36   |

|                  |    |    |    |     |     |
|------------------|----|----|----|-----|-----|
| O8-Ni6-Mo10-Pt8  | 32 | 0  | 10 | 9   | 19  |
| O8-Ni9-Mo2-Pt55  | 74 | 0  | 1  | 0   | 1   |
| O8-Ni9-Mo2-Pt56  | 75 | 0  | 1  | 0   | 1   |
| O8-Ni9-Mo2-Pt57  | 76 | 0  | 2  | 0   | 2   |
| O8-Ni9-Mo2-Pt58  | 77 | 0  | 2  | 0   | 2   |
| O8-Ni9-Mo2-Pt59  | 78 | 0  | 1  | 0   | 1   |
| O8-Ni9-Mo2-Pt60  | 79 | 0  | 1  | 0   | 1   |
| O8-Ni10-Mo2-Pt60 | 80 | 0  | 7  | 0   | 7   |
| O8-Ni10-Mo2-Pt61 | 81 | 0  | 1  | 0   | 1   |
| O8-Ni10-Mo2-Pt62 | 82 | 0  | 1  | 0   | 1   |
| O8-Ni10-Mo2-Pt63 | 83 | 0  | 1  | 0   | 1   |
| O8-Ni12-Pt12     | 32 | 0  | 3  | 5   | 8   |
| O8-Ni13-Mo2-Pt49 | 72 | 0  | 1  | 0   | 1   |
| O8-Ni13-Mo2-Pt50 | 73 | 0  | 1  | 0   | 1   |
| O8-Ni13-Mo2-Pt51 | 74 | 0  | 1  | 0   | 1   |
| O8-Ni13-Mo2-Pt53 | 76 | 0  | 11 | 0   | 11  |
| O8-Ni13-Mo2-Pt55 | 78 | 0  | 2  | 0   | 2   |
| O8-Ni16-Pt16     | 40 | 0  | 1  | 0   | 1   |
| O8-Ni16-Mo2-Pt54 | 80 | 0  | 1  | 0   | 1   |
| O8-Ni16-Mo2-Pt55 | 81 | 0  | 2  | 0   | 2   |
| O8-Ni16-Mo2-Pt56 | 82 | 0  | 1  | 0   | 1   |
| O8-Ni16-Mo2-Pt57 | 83 | 0  | 1  | 0   | 1   |
| O8-Ni18-Pt54     | 80 | 0  | 1  | 0   | 1   |
| O8-Ni18-Mo2-Pt54 | 82 | 0  | 4  | 59  | 63  |
| O8-Ni22-Mo10     | 40 | 0  | 1  | 0   | 1   |
| O9-Mo15-Pt8      | 32 | 0  | 34 | 8   | 42  |
| O9-Ni5-Mo10-Pt8  | 32 | 0  | 21 | 7   | 28  |
| O9-Ni9-Mo2-Pt55  | 75 | 0  | 1  | 0   | 1   |
| O9-Ni9-Mo2-Pt56  | 76 | 0  | 1  | 0   | 1   |
| O9-Ni9-Mo2-Pt57  | 77 | 0  | 8  | 0   | 8   |
| O9-Ni9-Mo2-Pt58  | 78 | 0  | 1  | 0   | 1   |
| O9-Ni9-Mo2-Pt59  | 79 | 0  | 1  | 0   | 1   |
| O9-Ni10-Mo2-Pt62 | 83 | 0  | 5  | 0   | 5   |
| O9-Ni13-Mo2-Pt51 | 75 | 0  | 8  | 0   | 8   |
| O9-Ni13-Mo2-Pt54 | 78 | 0  | 0  | 1   | 1   |
| O9-Ni13-Mo2-Pt55 | 79 | 0  | 1  | 0   | 1   |
| O9-Ni16-Mo2-Pt54 | 81 | 0  | 1  | 0   | 1   |
| O9-Ni16-Mo2-Pt55 | 82 | 0  | 1  | 0   | 1   |
| O9-Ni18-Pt54     | 81 | 0  | 1  | 0   | 1   |
| O10-Pt6          | 16 | 0  | 90 | 139 | 229 |
| O10-Mo6-Pt15     | 31 | 39 | 0  | 0   | 39  |

|                    |    |    |    |     |     |
|--------------------|----|----|----|-----|-----|
| O10-Ni3-Mo3-Pt15   | 31 | 35 | 0  | 0   | 35  |
| O10-Ni6-Mo2-Pt14   | 32 | 0  | 14 | 8   | 22  |
| O10-Ni9-Mo11-Pt2   | 32 | 0  | 17 | 3   | 20  |
| O10-Ni13-Mo2-Pt53  | 78 | 0  | 1  | 0   | 1   |
| O10-Ni13-Mo2-Pt54  | 79 | 0  | 7  | 0   | 7   |
| O11-Mo5-Pt15       | 31 | 77 | 0  | 0   | 77  |
| O11-Ni5-Pt15       | 31 | 81 | 0  | 0   | 81  |
| O11-Ni6-Mo1-Pt14   | 32 | 0  | 8  | 3   | 11  |
| O11-Ni10-Mo4-Pt26  | 51 | 28 | 0  | 0   | 28  |
| O11-Ni12-Mo4-Pt24  | 51 | 9  | 0  | 0   | 9   |
| O11-Ni15-Mo6-Pt19  | 51 | 12 | 0  | 0   | 12  |
| O11-Ni21-Mo9-Pt16  | 57 | 0  | 8  | 0   | 8   |
| O12-Mo10-Pt40      | 62 | 22 | 0  | 0   | 22  |
| O12-Ni7-Mo6-Pt37   | 62 | 34 | 0  | 0   | 34  |
| O12-Ni7-Mo10-Pt33  | 62 | 20 | 0  | 0   | 20  |
| O12-Ni20-Mo10-Pt16 | 58 | 0  | 13 | 0   | 13  |
| O13-Ni21-Mo9-Pt16  | 59 | 0  | 6  | 0   | 6   |
| O14-Pt7            | 21 | 0  | 54 | 138 | 192 |
| O14-Ni2-Mo6-Pt36   | 58 | 0  | 15 | 21  | 36  |
| O14-Ni14-Mo16-Pt20 | 64 | 0  | 11 | 5   | 16  |
| O14-Ni26-Mo4-Pt16  | 60 | 0  | 3  | 0   | 3   |
| O15-Ni11-Mo5-Pt31  | 62 | 19 | 0  | 0   | 19  |
| O16-Pt16           | 32 | 28 | 0  | 24  | 52  |
| O16-Mo6-Pt36       | 58 | 0  | 62 | 53  | 115 |
| O16-Mo28-Pt20      | 64 | 0  | 33 | 7   | 40  |
| O16-Mo30-Pt18      | 64 | 0  | 24 | 11  | 35  |
| O16-Ni10-Mo4-Pt34  | 64 | 0  | 2  | 2   | 4   |
| O16-Ni10-Mo14-Pt24 | 64 | 0  | 15 | 4   | 19  |
| O16-Ni14-Mo14-Pt20 | 64 | 0  | 41 | 2   | 43  |
| O16-Ni18-Mo16-Pt14 | 64 | 0  | 27 | 8   | 35  |
| O16-Ni24-Pt24      | 64 | 0  | 22 | 5   | 27  |
| O16-Ni24-Mo6-Pt18  | 64 | 0  | 21 | 10  | 31  |
| O16-Ni26-Mo4-Pt16  | 62 | 0  | 7  | 0   | 7   |
| O16-Ni32-Pt16      | 64 | 0  | 10 | 5   | 15  |
| O18-Pt7            | 25 | 0  | 65 | 116 | 181 |
| O18-Pt8            | 26 | 0  | 50 | 86  | 136 |
| O18-Pt9            | 27 | 0  | 61 | 100 | 161 |
| O18-Pt12           | 30 | 0  | 2  | 133 | 135 |
| O18-Mo24-Pt22      | 64 | 0  | 31 | 2   | 33  |
| O18-Mo28-Pt18      | 64 | 0  | 39 | 6   | 45  |
| O18-Mo30-Pt16      | 64 | 0  | 27 | 3   | 30  |

|                    |    |      |    |     |      |
|--------------------|----|------|----|-----|------|
| O18-Mo32-Pt14      | 64 | 0    | 77 | 18  | 95   |
| O18-Ni6-Pt40       | 64 | 0    | 21 | 0   | 21   |
| O18-Ni10-Mo14-Pt22 | 64 | 0    | 17 | 7   | 24   |
| O18-Ni14-Mo8-Pt24  | 64 | 0    | 9  | 0   | 9    |
| O18-Ni16-Mo16-Pt14 | 64 | 0    | 58 | 12  | 70   |
| O18-Ni22-Mo6-Pt18  | 64 | 0    | 16 | 5   | 21   |
| O18-Ni26-Mo4-Pt16  | 64 | 0    | 5  | 0   | 5    |
| O18-Ni30-Pt16      | 64 | 0    | 18 | 2   | 20   |
| O22-Mo14-Pt28      | 64 | 0    | 22 | 8   | 30   |
| O22-Mo16-Pt26      | 64 | 0    | 53 | 7   | 60   |
| O22-Ni4-Mo4-Pt34   | 64 | 0    | 12 | 2   | 14   |
| O22-Ni10-Mo4-Pt28  | 64 | 0    | 23 | 10  | 33   |
| O22-Ni12-Mo2-Pt28  | 64 | 0    | 27 | 3   | 30   |
| O22-Ni14-Mo2-Pt26  | 64 | 0    | 26 | 7   | 33   |
| O32-Pt16           | 48 | 33   | 70 | 17  | 120  |
| H1-Pt15            | 16 | 0    | 0  | 364 | 364  |
| H1-Pt23            | 24 | 0    | 7  | 32  | 39   |
| H1-Pt26            | 27 | 0    | 17 | 0   | 17   |
| H1-Pt27            | 28 | 0    | 18 | 0   | 18   |
| H1-Ni15            | 16 | 0    | 1  | 15  | 16   |
| H1-Ni21            | 22 | 0    | 21 | 2   | 23   |
| H1-Ni23            | 24 | 0    | 1  | 0   | 1    |
| H1-Ni26            | 27 | 0    | 7  | 0   | 7    |
| H1-Ni27            | 28 | 0    | 1  | 0   | 1    |
| H1-Ni31            | 32 | 0    | 0  | 3   | 3    |
| H2-Pt14            | 16 | 0    | 69 | 626 | 695  |
| H2-Pt27            | 29 | 0    | 24 | 22  | 46   |
| H2-Pt28            | 30 | 0    | 29 | 0   | 29   |
| H2-Ni14            | 16 | 0    | 20 | 17  | 37   |
| H2-Ni16            | 18 | 0    | 72 | 31  | 103  |
| H2-Ni21            | 23 | 0    | 0  | 1   | 1    |
| H2-Ni22            | 24 | 0    | 1  | 0   | 1    |
| H2-Ni27            | 29 | 0    | 1  | 3   | 4    |
| H2-Ni28            | 30 | 0    | 1  | 0   | 1    |
| H2-Ni30            | 32 | 1    | 0  | 0   | 1    |
| H2-O1-Ni15         | 18 | 0    | 3  | 4   | 7    |
| H3-Pt26            | 29 | 0    | 33 | 0   | 33   |
| H3-Ni26            | 29 | 0    | 13 | 0   | 13   |
| H4-Pt12            | 16 | 2122 | 0  | 256 | 2378 |
| H4-Pt17            | 21 | 0    | 0  | 170 | 170  |
| H4-Pt20            | 24 | 0    | 28 | 0   | 28   |

|                 |    |      |     |      |      |
|-----------------|----|------|-----|------|------|
| H4-Pt24         | 28 | 0    | 28  | 0    | 28   |
| H4-Ni12         | 16 | 104  | 104 | 12   | 220  |
| H4-Ni17         | 21 | 0    | 5   | 4    | 9    |
| H4-Ni20         | 24 | 0    | 3   | 0    | 3    |
| H4-Ni32         | 36 | 0    | 5   | 0    | 5    |
| H4-O1-Ni11      | 16 | 0    | 7   | 14   | 21   |
| H4-O2-Ni10      | 16 | 0    | 3   | 8    | 11   |
| H4-O2-Ni30      | 36 | 0    | 3   | 2    | 5    |
| H5-Pt16         | 21 | 0    | 182 | 38   | 220  |
| H5-Ni16         | 21 | 0    | 8   | 0    | 8    |
| H5-Ni27         | 32 | 0    | 1   | 0    | 1    |
| H6-Pt10         | 16 | 0    | 0   | 360  | 360  |
| H6-Pt15         | 21 | 0    | 286 | 5    | 291  |
| H6-Pt25         | 31 | 0    | 133 | 0    | 133  |
| H6-Pt26         | 32 | 95   | 72  | 106  | 273  |
| H6-Ni10         | 16 | 0    | 23  | 14   | 37   |
| H6-Ni15         | 21 | 0    | 20  | 0    | 20   |
| H6-Ni16         | 22 | 0    | 79  | 24   | 103  |
| H6-Ni25         | 31 | 0    | 65  | 37   | 102  |
| H6-Ni26         | 32 | 7    | 10  | 11   | 28   |
| H6-O1-Ni15      | 22 | 0    | 4   | 0    | 4    |
| H6-O2-Ni14      | 22 | 0    | 7   | 0    | 7    |
| H7-Pt25         | 32 | 0    | 0   | 117  | 117  |
| H7-Ni25         | 32 | 0    | 0   | 5    | 5    |
| H8-Pt8          | 16 | 2986 | 0   | 1459 | 4445 |
| H8-Pt16         | 24 | 0    | 27  | 21   | 48   |
| H8-Pt20         | 28 | 0    | 16  | 0    | 16   |
| H8-Ni8          | 16 | 87   | 145 | 63   | 295  |
| H8-Ni16         | 24 | 0    | 1   | 0    | 1    |
| H8-Ni20         | 28 | 0    | 5   | 1    | 6    |
| H8-O1-Ni7       | 16 | 0    | 33  | 10   | 43   |
| H8-O2-Ni6       | 16 | 0    | 2   | 0    | 2    |
| H9-Pt23         | 32 | 145  | 0   | 0    | 145  |
| H9-Ni23         | 32 | 9    | 11  | 0    | 20   |
| H10-Pt21        | 31 | 0    | 135 | 0    | 135  |
| H10-Pt22        | 32 | 0    | 54  | 206  | 260  |
| H10-Ni21        | 31 | 0    | 15  | 9    | 24   |
| H10-Ni22        | 32 | 0    | 20  | 9    | 29   |
| H10-O5-Pt12     | 27 | 0    | 623 | 13   | 636  |
| H10-O5-Mo1-Pt11 | 27 | 0    | 6   | 8    | 14   |
| H10-O5-Mo2-Pt10 | 27 | 0    | 4   | 7    | 11   |

|                     |    |   |     |      |      |
|---------------------|----|---|-----|------|------|
| H10-O5-Ni1-Pt11     | 27 | 0 | 13  | 9    | 22   |
| H10-O5-Ni1-Mo1-Pt10 | 27 | 0 | 8   | 5    | 13   |
| H10-O5-Ni1-Mo2-Pt9  | 27 | 0 | 7   | 5    | 12   |
| H10-O5-Ni1-Mo3-Pt8  | 27 | 0 | 9   | 11   | 20   |
| H10-O5-Ni1-Mo4-Pt7  | 27 | 0 | 5   | 8    | 13   |
| H10-O5-Ni2-Pt10     | 27 | 0 | 73  | 47   | 120  |
| H10-O5-Ni2-Mo1-Pt9  | 27 | 0 | 12  | 13   | 25   |
| H10-O5-Ni2-Mo2-Pt8  | 27 | 0 | 96  | 70   | 166  |
| H10-O5-Ni2-Mo4-Pt6  | 27 | 0 | 7   | 7    | 14   |
| H10-O5-Ni3-Pt9      | 27 | 0 | 7   | 7    | 14   |
| H10-O5-Ni3-Mo1-Pt8  | 27 | 0 | 48  | 18   | 66   |
| H10-O5-Ni3-Mo2-Pt7  | 27 | 0 | 16  | 17   | 33   |
| H10-O5-Ni3-Mo3-Pt6  | 27 | 0 | 21  | 25   | 46   |
| H10-O5-Ni4-Pt8      | 27 | 0 | 12  | 4    | 16   |
| H10-O5-Ni4-Mo2-Pt6  | 27 | 0 | 8   | 8    | 16   |
| H10-O5-Ni5-Mo1-Pt6  | 27 | 0 | 2   | 3    | 5    |
| H10-O5-Ni5-Mo3-Pt4  | 27 | 0 | 11  | 4    | 15   |
| H10-O5-Ni6-Pt6      | 27 | 0 | 9   | 3    | 12   |
| H11-Pt5             | 16 | 0 | 41  | 1334 | 1375 |
| H11-Pt21            | 32 | 0 | 0   | 218  | 218  |
| H11-Ni5             | 16 | 0 | 36  | 68   | 104  |
| H11-Ni17            | 28 | 0 | 22  | 0    | 22   |
| H11-Ni21            | 32 | 0 | 0   | 5    | 5    |
| H11-O1-Ni4          | 16 | 0 | 12  | 0    | 12   |
| H11-O5-Pt12         | 28 | 0 | 258 | 22   | 280  |
| H11-O5-Ni1-Pt11     | 28 | 0 | 6   | 5    | 11   |
| H11-O5-Ni1-Mo1-Pt10 | 28 | 0 | 3   | 7    | 10   |
| H11-O5-Ni1-Mo2-Pt9  | 28 | 0 | 2   | 1    | 3    |
| H11-O5-Ni2-Pt10     | 28 | 0 | 15  | 10   | 25   |
| H11-O5-Ni2-Mo1-Pt9  | 28 | 0 | 2   | 3    | 5    |
| H11-O5-Ni2-Mo2-Pt8  | 28 | 0 | 4   | 1    | 5    |
| H11-O5-Ni2-Mo3-Pt7  | 28 | 0 | 4   | 8    | 12   |
| H11-O5-Ni3-Pt9      | 28 | 0 | 7   | 8    | 15   |
| H11-O5-Ni3-Mo1-Pt8  | 28 | 0 | 19  | 23   | 42   |
| H11-O5-Ni4-Mo1-Pt7  | 28 | 0 | 1   | 0    | 1    |
| H11-O5-Ni4-Mo2-Pt6  | 28 | 0 | 5   | 1    | 6    |
| H12-Pt16            | 28 | 0 | 2   | 126  | 128  |
| H12-Ni19            | 31 | 0 | 15  | 20   | 35   |
| H12-Ni32            | 44 | 0 | 8   | 0    | 8    |
| H12-O5-Pt12         | 29 | 0 | 267 | 32   | 299  |
| H12-O5-Ni1-Mo1-Pt10 | 29 | 0 | 23  | 18   | 41   |



|                     |    |   |     |      |      |
|---------------------|----|---|-----|------|------|
| H12-O5-Ni1-Mo2-Pt9  | 29 | 0 | 7   | 6    | 13   |
| H12-O5-Ni2-Pt10     | 29 | 0 | 7   | 3    | 10   |
| H12-O5-Ni2-Mo1-Pt9  | 29 | 0 | 42  | 34   | 76   |
| H12-O5-Ni2-Mo2-Pt8  | 29 | 0 | 9   | 6    | 15   |
| H12-O5-Ni3-Mo2-Pt7  | 29 | 0 | 45  | 64   | 109  |
| H13-Pt19            | 32 | 0 | 0   | 53   | 53   |
| H13-Ni16            | 29 | 0 | 109 | 79   | 188  |
| H13-Ni19            | 32 | 0 | 0   | 1    | 1    |
| H13-O1-Ni15         | 29 | 0 | 6   | 8    | 14   |
| H13-O2-Ni14         | 29 | 0 | 1   | 7    | 8    |
| H13-O5-Pt12         | 30 | 0 | 244 | 8    | 252  |
| H13-O5-Mo2-Pt10     | 30 | 0 | 9   | 10   | 19   |
| H13-O5-Ni1-Pt11     | 30 | 0 | 8   | 2    | 10   |
| H13-O5-Ni1-Mo1-Pt10 | 30 | 0 | 6   | 1    | 7    |
| H13-O5-Ni1-Mo2-Pt9  | 30 | 0 | 3   | 10   | 13   |
| H13-O5-Ni2-Mo1-Pt9  | 30 | 0 | 18  | 9    | 27   |
| H13-O5-Ni3-Mo1-Pt8  | 30 | 0 | 5   | 6    | 11   |
| H13-O5-Ni4-Mo1-Pt7  | 30 | 0 | 18  | 17   | 35   |
| H13-O5-Ni4-Mo2-Pt6  | 30 | 0 | 5   | 6    | 11   |
| H14-Pt16            | 30 | 0 | 1   | 53   | 54   |
| H14-Pt17            | 31 | 0 | 0   | 165  | 165  |
| H14-Pt18            | 32 | 0 | 0   | 138  | 138  |
| H14-Ni16            | 30 | 0 | 0   | 3    | 3    |
| H14-Ni17            | 31 | 0 | 0   | 4    | 4    |
| H14-Ni18            | 32 | 0 | 0   | 1    | 1    |
| H14-O7              | 21 | 0 | 1   | 756  | 757  |
| H15-Pt6             | 21 | 0 | 650 | 0    | 650  |
| H15-Pt16            | 31 | 0 | 1   | 254  | 255  |
| H15-Pt17            | 32 | 0 | 0   | 257  | 257  |
| H15-Ni6             | 21 | 0 | 18  | 8    | 26   |
| H15-Ni16            | 31 | 0 | 7   | 5    | 12   |
| H15-Ni17            | 32 | 0 | 1   | 14   | 15   |
| H15-O1-Ni5          | 21 | 0 | 10  | 0    | 10   |
| H16-Pt5             | 21 | 0 | 950 | 58   | 1008 |
| H16-Pt16            | 32 | 0 | 1   | 507  | 508  |
| H16-Ni5             | 21 | 0 | 38  | 29   | 67   |
| H16-Ni16            | 32 | 0 | 9   | 18   | 27   |
| H16-O8              | 24 | 0 | 14  | 3911 | 3925 |
| H17-Pt15            | 32 | 0 | 0   | 140  | 140  |
| H17-Ni15            | 32 | 0 | 0   | 4    | 4    |
| H18-Pt13            | 31 | 0 | 0   | 80   | 80   |

|                      |    |   |     |      |      |
|----------------------|----|---|-----|------|------|
| H18-Ni13             | 31 | 0 | 0   | 1    | 1    |
| H19-Pt13             | 32 | 0 | 0   | 64   | 64   |
| H19-Ni12             | 31 | 0 | 44  | 9    | 53   |
| H19-Ni13             | 32 | 0 | 7   | 1    | 8    |
| H19-Ni21             | 40 | 0 | 8   | 11   | 19   |
| H19-O1-Ni11          | 31 | 0 | 2   | 10   | 12   |
| H23-Pt8              | 31 | 0 | 255 | 85   | 340  |
| H23-Pt9              | 32 | 0 | 233 | 132  | 365  |
| H23-Ni8              | 31 | 0 | 13  | 4    | 17   |
| H23-Ni9              | 32 | 0 | 11  | 18   | 29   |
| H23-O1-Ni8           | 32 | 0 | 5   | 0    | 5    |
| H23-O11-Pt16         | 50 | 0 | 145 | 1855 | 2000 |
| H23-O11-Mo1-Pt15     | 50 | 0 | 18  | 55   | 73   |
| H23-O11-Mo3-Pt13     | 50 | 0 | 5   | 22   | 27   |
| H23-O11-Ni1-Pt15     | 50 | 0 | 2   | 19   | 21   |
| H23-O11-Ni1-Mo1-Pt14 | 50 | 0 | 2   | 6    | 8    |
| H23-O11-Ni1-Mo2-Pt13 | 50 | 0 | 11  | 29   | 40   |
| H23-O11-Ni1-Mo3-Pt12 | 50 | 0 | 5   | 16   | 21   |
| H23-O11-Ni1-Mo4-Pt11 | 50 | 0 | 2   | 15   | 17   |
| H23-O11-Ni1-Mo5-Pt10 | 50 | 0 | 7   | 19   | 26   |
| H23-O11-Ni2-Pt14     | 50 | 0 | 11  | 47   | 58   |
| H23-O11-Ni2-Mo1-Pt13 | 50 | 0 | 11  | 35   | 46   |
| H23-O11-Ni2-Mo2-Pt12 | 50 | 0 | 13  | 63   | 76   |
| H23-O11-Ni2-Mo3-Pt11 | 50 | 0 | 3   | 24   | 27   |
| H23-O11-Ni2-Mo4-Pt10 | 50 | 0 | 7   | 20   | 27   |
| H23-O11-Ni3-Pt13     | 50 | 0 | 9   | 41   | 50   |
| H23-O11-Ni3-Mo1-Pt12 | 50 | 0 | 10  | 49   | 59   |
| H23-O11-Ni3-Mo2-Pt11 | 50 | 0 | 6   | 25   | 31   |
| H23-O11-Ni3-Mo3-Pt10 | 50 | 0 | 37  | 111  | 148  |
| H23-O11-Ni3-Mo4-Pt9  | 50 | 0 | 3   | 10   | 13   |
| H23-O11-Ni3-Mo5-Pt8  | 50 | 0 | 6   | 20   | 26   |
| H23-O11-Ni4-Pt12     | 50 | 0 | 7   | 29   | 36   |
| H23-O11-Ni4-Mo1-Pt11 | 50 | 0 | 14  | 77   | 91   |
| H23-O11-Ni4-Mo2-Pt10 | 50 | 0 | 10  | 33   | 43   |
| H23-O11-Ni4-Mo3-Pt9  | 50 | 0 | 10  | 51   | 61   |
| H23-O11-Ni4-Mo4-Pt8  | 50 | 0 | 3   | 21   | 24   |
| H23-O11-Ni5-Pt11     | 50 | 0 | 3   | 12   | 15   |
| H23-O11-Ni5-Mo1-Pt10 | 50 | 0 | 9   | 26   | 35   |
| H23-O11-Ni5-Mo2-Pt9  | 50 | 0 | 30  | 63   | 93   |
| H23-O11-Ni5-Mo3-Pt8  | 50 | 0 | 3   | 11   | 14   |
| H23-O11-Ni5-Mo4-Pt7  | 50 | 0 | 1   | 2    | 3    |

|                      |    |   |    |     |      |
|----------------------|----|---|----|-----|------|
| H23-O11-Ni6-Mo1-Pt9  | 50 | 0 | 2  | 4   | 6    |
| H23-O11-Ni6-Mo2-Pt8  | 50 | 0 | 21 | 104 | 125  |
| H23-O11-Ni6-Mo3-Pt7  | 50 | 0 | 2  | 19  | 21   |
| H23-O11-Ni7-Mo2-Pt7  | 50 | 0 | 1  | 7   | 8    |
| H24-Pt8              | 32 | 0 | 62 | 113 | 175  |
| H24-Ni8              | 32 | 0 | 0  | 1   | 1    |
| H24-O11-Pt16         | 51 | 0 | 83 | 923 | 1006 |
| H24-O11-Mo1-Pt15     | 51 | 0 | 2  | 18  | 20   |
| H24-O11-Mo2-Pt14     | 51 | 0 | 1  | 3   | 4    |
| H24-O11-Ni1-Mo1-Pt14 | 51 | 0 | 2  | 9   | 11   |
| H24-O11-Ni1-Mo3-Pt12 | 51 | 0 | 3  | 17  | 20   |
| H24-O11-Ni2-Pt14     | 51 | 0 | 1  | 4   | 5    |
| H24-O11-Ni2-Mo1-Pt13 | 51 | 0 | 9  | 40  | 49   |
| H24-O11-Ni2-Mo2-Pt12 | 51 | 0 | 25 | 113 | 138  |
| H24-O11-Ni2-Mo3-Pt11 | 51 | 0 | 0  | 14  | 14   |
| H24-O11-Ni2-Mo4-Pt10 | 51 | 0 | 2  | 17  | 19   |
| H24-O11-Ni2-Mo5-Pt9  | 51 | 0 | 0  | 25  | 25   |
| H24-O11-Ni3-Pt13     | 51 | 0 | 2  | 16  | 18   |
| H24-O11-Ni3-Mo1-Pt12 | 51 | 0 | 5  | 35  | 40   |
| H24-O11-Ni3-Mo2-Pt11 | 51 | 0 | 8  | 40  | 48   |
| H24-O11-Ni3-Mo3-Pt10 | 51 | 0 | 1  | 11  | 12   |
| H24-O11-Ni3-Mo4-Pt9  | 51 | 0 | 0  | 11  | 11   |
| H24-O11-Ni4-Pt12     | 51 | 0 | 1  | 8   | 9    |
| H24-O11-Ni4-Mo1-Pt11 | 51 | 0 | 3  | 5   | 8    |
| H24-O11-Ni4-Mo2-Pt10 | 51 | 0 | 5  | 18  | 23   |
| H24-O11-Ni4-Mo3-Pt9  | 51 | 0 | 2  | 3   | 5    |
| H24-O11-Ni5-Pt11     | 51 | 0 | 1  | 6   | 7    |
| H24-O11-Ni5-Mo2-Pt9  | 51 | 0 | 6  | 12  | 18   |
| H24-O11-Ni6-Mo1-Pt9  | 51 | 0 | 10 | 59  | 69   |
| H25-O11-Pt16         | 52 | 0 | 52 | 746 | 798  |
| H25-O11-Mo1-Pt15     | 52 | 0 | 0  | 4   | 4    |
| H25-O11-Mo2-Pt14     | 52 | 0 | 3  | 13  | 16   |
| H25-O11-Ni1-Pt15     | 52 | 0 | 3  | 9   | 12   |
| H25-O11-Ni1-Mo2-Pt13 | 52 | 0 | 2  | 9   | 11   |
| H25-O11-Ni1-Mo3-Pt12 | 52 | 0 | 2  | 20  | 22   |
| H25-O11-Ni1-Mo4-Pt11 | 52 | 0 | 0  | 5   | 5    |
| H25-O11-Ni2-Pt14     | 52 | 0 | 0  | 4   | 4    |
| H25-O11-Ni2-Mo1-Pt13 | 52 | 0 | 6  | 27  | 33   |
| H25-O11-Ni2-Mo2-Pt12 | 52 | 0 | 1  | 20  | 21   |
| H25-O11-Ni2-Mo3-Pt11 | 52 | 0 | 4  | 23  | 27   |
| H25-O11-Ni3-Pt13     | 52 | 0 | 1  | 11  | 12   |

|                       |     |     |     |     |     |
|-----------------------|-----|-----|-----|-----|-----|
| H25-O11-Ni3-Mo1-Pt12  | 52  | 0   | 6   | 15  | 21  |
| H25-O11-Ni3-Mo2-Pt11  | 52  | 0   | 2   | 26  | 28  |
| H25-O11-Ni3-Mo3-Pt10  | 52  | 0   | 3   | 13  | 16  |
| H25-O11-Ni3-Mo4-Pt9   | 52  | 0   | 2   | 5   | 7   |
| H25-O11-Ni3-Mo5-Pt8   | 52  | 0   | 0   | 5   | 5   |
| H25-O11-Ni4-Pt12      | 52  | 0   | 2   | 7   | 9   |
| H25-O11-Ni4-Mo1-Pt11  | 52  | 0   | 9   | 87  | 96  |
| H25-O11-Ni4-Mo2-Pt10  | 52  | 0   | 4   | 20  | 24  |
| H25-O11-Ni4-Mo3-Pt9   | 52  | 0   | 17  | 69  | 86  |
| H25-O11-Ni6-Pt10      | 52  | 0   | 0   | 10  | 10  |
| H25-O11-Ni6-Mo1-Pt9   | 52  | 0   | 2   | 6   | 8   |
| H27-O23-Ni18-Mo2-Pt54 | 124 | 0   | 6   | 74  | 80  |
| H28-O22-Ni18-Mo2-Pt54 | 124 | 0   | 11  | 76  | 87  |
| H30-O15               | 45  | 124 | 4   | 94  | 222 |
| H32-O19-Ni18-Pt54     | 123 | 0   | 11  | 42  | 53  |
| H42-O25-Pt72          | 139 | 0   | 0   | 26  | 26  |
| H43-O25-Pt72          | 140 | 0   | 0   | 73  | 73  |
| H43-O31-Ni18-Mo2-Pt54 | 148 | 0   | 0   | 1   | 1   |
| H45-O22-Pt32          | 99  | 0   | 350 | 0   | 350 |
| H45-O22-Ni3-Mo5-Pt24  | 99  | 0   | 1   | 8   | 9   |
| H45-O22-Ni4-Mo2-Pt26  | 99  | 0   | 2   | 4   | 6   |
| H45-O22-Ni4-Mo3-Pt25  | 99  | 0   | 1   | 1   | 2   |
| H45-O22-Ni4-Mo4-Pt24  | 99  | 0   | 1   | 0   | 1   |
| H45-O22-Ni4-Mo6-Pt22  | 99  | 0   | 7   | 5   | 12  |
| H45-O22-Ni6-Mo4-Pt22  | 99  | 0   | 2   | 2   | 4   |
| H45-O22-Ni7-Mo3-Pt22  | 99  | 0   | 1   | 0   | 1   |
| H45-O22-Ni7-Mo6-Pt19  | 99  | 0   | 0   | 3   | 3   |
| H45-O22-Ni8-Mo4-Pt20  | 99  | 0   | 1   | 3   | 4   |
| H45-O22-Ni9-Pt23      | 99  | 0   | 1   | 2   | 3   |
| H45-O22-Ni9-Mo4-Pt19  | 99  | 0   | 1   | 3   | 4   |
| H45-O22-Ni11-Mo4-Pt17 | 99  | 0   | 1   | 0   | 1   |
| H48-O24-Pt24          | 96  | 0   | 14  | 104 | 118 |
| H48-O24-Ni2-Mo2-Pt20  | 96  | 0   | 0   | 1   | 1   |
| H48-O24-Ni3-Mo6-Pt15  | 96  | 0   | 1   | 3   | 4   |
| H48-O24-Ni4-Mo4-Pt16  | 96  | 0   | 0   | 2   | 2   |
| H48-O24-Ni5-Mo1-Pt18  | 96  | 0   | 0   | 2   | 2   |
| H48-O24-Ni5-Mo2-Pt17  | 96  | 0   | 0   | 1   | 1   |
| H48-O24-Ni6-Mo1-Pt17  | 96  | 0   | 0   | 1   | 1   |
| H48-O24-Ni6-Mo2-Pt16  | 96  | 0   | 2   | 1   | 3   |
| H52-O22-Pt32          | 106 | 0   | 765 | 0   | 765 |
| H52-O22-Ni1-Mo6-Pt25  | 106 | 0   | 0   | 6   | 6   |

|                       |     |   |    |    |    |
|-----------------------|-----|---|----|----|----|
| H52-O22-Ni2-Mo2-Pt28  | 106 | 0 | 1  | 3  | 4  |
| H52-O22-Ni2-Mo3-Pt27  | 106 | 0 | 3  | 1  | 4  |
| H52-O22-Ni2-Mo5-Pt25  | 106 | 0 | 1  | 0  | 1  |
| H52-O22-Ni2-Mo6-Pt24  | 106 | 0 | 4  | 5  | 9  |
| H52-O22-Ni3-Pt29      | 106 | 0 | 0  | 1  | 1  |
| H52-O22-Ni3-Mo3-Pt26  | 106 | 0 | 1  | 5  | 6  |
| H52-O22-Ni3-Mo4-Pt25  | 106 | 0 | 16 | 21 | 37 |
| H52-O22-Ni3-Mo5-Pt24  | 106 | 0 | 3  | 2  | 5  |
| H52-O22-Ni3-Mo6-Pt23  | 106 | 0 | 1  | 3  | 4  |
| H52-O22-Ni3-Mo10-Pt19 | 106 | 0 | 1  | 1  | 2  |
| H52-O22-Ni4-Mo1-Pt27  | 106 | 0 | 1  | 0  | 1  |
| H52-O22-Ni4-Mo3-Pt25  | 106 | 0 | 1  | 0  | 1  |
| H52-O22-Ni4-Mo4-Pt24  | 106 | 0 | 2  | 6  | 8  |
| H52-O22-Ni4-Mo5-Pt23  | 106 | 0 | 2  | 15 | 17 |
| H52-O22-Ni4-Mo6-Pt22  | 106 | 0 | 2  | 9  | 11 |
| H52-O22-Ni4-Mo10-Pt18 | 106 | 0 | 2  | 12 | 14 |
| H52-O22-Ni5-Mo1-Pt26  | 106 | 0 | 4  | 14 | 18 |
| H52-O22-Ni5-Mo2-Pt25  | 106 | 0 | 2  | 5  | 7  |
| H52-O22-Ni5-Mo3-Pt24  | 106 | 0 | 2  | 22 | 24 |
| H52-O22-Ni5-Mo4-Pt23  | 106 | 0 | 1  | 2  | 3  |
| H52-O22-Ni5-Mo5-Pt22  | 106 | 0 | 2  | 6  | 8  |
| H52-O22-Ni5-Mo6-Pt21  | 106 | 0 | 1  | 5  | 6  |
| H52-O22-Ni5-Mo7-Pt20  | 106 | 0 | 2  | 2  | 4  |
| H52-O22-Ni6-Mo1-Pt25  | 106 | 0 | 1  | 4  | 5  |
| H52-O22-Ni6-Mo3-Pt23  | 106 | 0 | 10 | 26 | 36 |
| H52-O22-Ni6-Mo4-Pt22  | 106 | 0 | 3  | 7  | 10 |
| H52-O22-Ni6-Mo5-Pt21  | 106 | 0 | 1  | 2  | 3  |
| H52-O22-Ni6-Mo6-Pt20  | 106 | 0 | 5  | 26 | 31 |
| H52-O22-Ni7-Mo2-Pt23  | 106 | 0 | 3  | 9  | 12 |
| H52-O22-Ni7-Mo3-Pt22  | 106 | 0 | 1  | 2  | 3  |
| H52-O22-Ni7-Mo5-Pt20  | 106 | 0 | 1  | 2  | 3  |
| H52-O22-Ni8-Mo1-Pt23  | 106 | 0 | 1  | 5  | 6  |
| H52-O22-Ni8-Mo2-Pt22  | 106 | 0 | 1  | 2  | 3  |
| H52-O22-Ni8-Mo3-Pt21  | 106 | 0 | 1  | 2  | 3  |
| H52-O22-Ni8-Mo4-Pt20  | 106 | 0 | 1  | 4  | 5  |
| H52-O22-Ni8-Mo5-Pt19  | 106 | 0 | 3  | 4  | 7  |
| H52-O22-Ni9-Mo2-Pt21  | 106 | 0 | 2  | 0  | 2  |
| H52-O22-Ni9-Mo3-Pt20  | 106 | 0 | 4  | 5  | 9  |
| H52-O22-Ni9-Mo5-Pt18  | 106 | 0 | 3  | 11 | 14 |
| H52-O22-Ni10-Mo1-Pt21 | 106 | 0 | 3  | 3  | 6  |
| H52-O22-Ni10-Mo6-Pt16 | 106 | 0 | 2  | 3  | 5  |

|                        |     |       |       |       |       |
|------------------------|-----|-------|-------|-------|-------|
| H52-O22-Ni11-Mo4-Pt17  | 106 | 0     | 1     | 0     | 1     |
| H58-O32-Ni18-Pt54      | 162 | 0     | 0     | 8     | 8     |
| H58-O37-Ni18-Mo2-Pt54  | 169 | 0     | 1     | 3     | 4     |
| H58-O39-Ni18-Mo2-Pt54  | 171 | 0     | 0     | 4     | 4     |
| H59-O32-Ni18-Pt54      | 163 | 0     | 1     | 1     | 2     |
| H59-O39-Ni18-Mo2-Pt54  | 172 | 0     | 0     | 25    | 25    |
| H64-O35-Ni18-Pt54      | 171 | 0     | 0     | 2     | 2     |
| H67-O32-Pt48           | 147 | 0     | 0     | 2     | 2     |
| H70-O32-Pt48           | 150 | 0     | 0     | 11    | 11    |
| H78-O32-Pt48           | 158 | 0     | 1     | 70    | 71    |
| H78-O32-Ni5-Mo3-Pt40   | 158 | 0     | 0     | 2     | 2     |
| H78-O32-Ni6-Mo1-Pt41   | 158 | 0     | 3     | 16    | 19    |
| H78-O32-Ni8-Mo3-Pt37   | 158 | 0     | 0     | 2     | 2     |
| H78-O32-Ni11-Mo5-Pt32  | 158 | 0     | 0     | 1     | 1     |
| H78-O32-Ni14-Mo4-Pt30  | 158 | 0     | 0     | 1     | 1     |
| H80-O32-Pt48           | 160 | 0     | 0     | 72    | 72    |
| H80-O32-Ni5-Mo7-Pt36   | 160 | 0     | 0     | 4     | 4     |
| H80-O32-Ni6-Mo7-Pt35   | 160 | 0     | 0     | 1     | 1     |
| H84-O50-Pt62           | 196 | 0     | 0     | 51    | 51    |
| H84-O50-Pt64           | 198 | 0     | 0     | 56    | 56    |
| H84-O50-Ni10-Mo8-Pt44  | 196 | 0     | 0     | 1     | 1     |
| H84-O50-Ni10-Mo8-Pt46  | 198 | 0     | 1     | 16    | 17    |
| H84-O50-Ni11-Mo8-Pt45  | 198 | 0     | 0     | 4     | 4     |
| H84-O50-Ni16-Mo11-Pt35 | 196 | 0     | 0     | 3     | 3     |
| H98-O44-Pt64           | 206 | 0     | 127   | 0     | 127   |
| H98-O44-Ni6-Mo6-Pt52   | 206 | 0     | 1     | 1     | 2     |
| H98-O44-Ni8-Mo11-Pt45  | 206 | 0     | 1     | 1     | 2     |
| H98-O44-Ni9-Mo6-Pt49   | 206 | 0     | 1     | 0     | 1     |
| H98-O44-Ni10-Mo6-Pt48  | 206 | 0     | 4     | 0     | 4     |
| H98-O44-Ni10-Mo8-Pt46  | 206 | 0     | 1     | 0     | 1     |
| H98-O44-Ni11-Mo4-Pt49  | 206 | 0     | 1     | 0     | 1     |
| H98-O44-Ni12-Mo12-Pt40 | 206 | 0     | 1     | 0     | 1     |
| H98-O44-Ni13-Mo1-Pt50  | 206 | 0     | 1     | 0     | 1     |
| H98-O44-Ni14-Mo7-Pt43  | 206 | 0     | 1     | 0     | 1     |
| total                  | --  | 10471 | 14400 | 64379 | 89250 |

## 1.2 Benchmark of G-NN potential against DFT calculations

To benchmark the accuracy of G-NN potential, we compare NN energies with DFT results for 83 selected PtNiMo bulk structures. The RMSE of the energy difference is 2.227 meV/atom, accurate enough for searching stable structures. The details for energies between NN and DFT

results are given in Table S2.

**Table S2.** Benchmark of G-NN potential.

| <b>Composition</b>                                 | <b><math>E_{\text{DFT}}</math> (eV)</b> | <b><math>E_{\text{NN}}</math> (eV)</b> | <b><math>E_{\text{diff}}</math> (meV/atom)</b> |
|----------------------------------------------------|-----------------------------------------|----------------------------------------|------------------------------------------------|
| Pt <sub>19</sub> Ni <sub>13</sub> Mo <sub>16</sub> | -375.26                                 | -375.38                                | 2.43                                           |
| Pt <sub>19</sub> Ni <sub>11</sub> Mo <sub>18</sub> | -383.46                                 | -383.21                                | -5.03                                          |
| Pt <sub>19</sub> Ni <sub>5</sub> Mo <sub>24</sub>  | -417.93                                 | -417.97                                | 0.80                                           |
| Pt <sub>19</sub> Ni <sub>15</sub> Mo <sub>14</sub> | -363.32                                 | -363.29                                | -0.75                                          |
| Pt <sub>19</sub> Ni <sub>9</sub> Mo <sub>20</sub>  | -391.71                                 | -391.62                                | -1.81                                          |
| Pt <sub>19</sub> Ni <sub>3</sub> Mo <sub>26</sub>  | -428.38                                 | -428.32                                | -1.31                                          |
| Pt <sub>19</sub> Ni <sub>0</sub> Mo <sub>29</sub>  | -444.10                                 | -443.99                                | -2.31                                          |
| Pt <sub>19</sub> Ni <sub>1</sub> Mo <sub>28</sub>  | -438.83                                 | -438.72                                | -2.39                                          |
| Pt <sub>19</sub> Ni <sub>7</sub> Mo <sub>22</sub>  | -406.72                                 | -406.57                                | -3.05                                          |
| Pt <sub>19</sub> Ni <sub>17</sub> Mo <sub>12</sub> | -352.90                                 | -352.81                                | -1.81                                          |
| Pt <sub>19</sub> Ni <sub>19</sub> Mo <sub>10</sub> | -341.20                                 | -341.17                                | -0.66                                          |
| Pt <sub>19</sub> Ni <sub>21</sub> Mo <sub>8</sub>  | -341.20                                 | -341.17                                | -0.66                                          |
| Pt <sub>19</sub> Ni <sub>22</sub> Mo <sub>7</sub>  | -323.20                                 | -323.04                                | -3.23                                          |
| Pt <sub>19</sub> Ni <sub>20</sub> Mo <sub>9</sub>  | -335.08                                 | -334.96                                | -2.64                                          |
| Pt <sub>18</sub> Ni <sub>22</sub> Mo <sub>8</sub>  | -328.33                                 | -328.26                                | -1.46                                          |
| Pt <sub>18</sub> Ni <sub>20</sub> Mo <sub>10</sub> | -340.35                                 | -340.29                                | -1.31                                          |
| Pt <sub>20</sub> Ni <sub>20</sub> Mo <sub>8</sub>  | -329.62                                 | -329.56                                | -1.12                                          |
| Pt <sub>20</sub> Ni <sub>19</sub> Mo <sub>9</sub>  | -334.86                                 | -335.06                                | 4.12                                           |
| Pt <sub>19</sub> Ni <sub>23</sub> Mo <sub>6</sub>  | -317.03                                 | -317.02                                | -0.12                                          |
| Pt <sub>19</sub> Ni <sub>25</sub> Mo <sub>4</sub>  | -304.86                                 | -304.92                                | 1.22                                           |
| Pt <sub>19</sub> Ni <sub>27</sub> Mo <sub>2</sub>  | -292.84                                 | -292.88                                | 0.88                                           |
| Pt <sub>19</sub> Ni <sub>29</sub> Mo <sub>0</sub>  | -280.61                                 | -280.56                                | -1.12                                          |
| Pt <sub>24</sub> Ni <sub>1</sub> Mo <sub>23</sub>  | -417.63                                 | -417.67                                | 0.73                                           |
| Pt <sub>24</sub> Ni <sub>8</sub> Mo <sub>16</sub>  | -379.24                                 | -379.22                                | -0.47                                          |
| Pt <sub>24</sub> Ni <sub>2</sub> Mo <sub>22</sub>  | -411.84                                 | -411.75                                | -1.96                                          |
| Pt <sub>24</sub> Ni <sub>0</sub> Mo <sub>24</sub>  | -422.49                                 | -422.40                                | -1.87                                          |
| Pt <sub>24</sub> Ni <sub>9</sub> Mo <sub>15</sub>  | -373.23                                 | -373.15                                | -1.50                                          |
| Pt <sub>24</sub> Ni <sub>10</sub> Mo <sub>14</sub> | -367.44                                 | -367.41                                | -0.56                                          |
| Pt <sub>24</sub> Ni <sub>5</sub> Mo <sub>19</sub>  | -395.36                                 | -395.38                                | 0.49                                           |
| Pt <sub>24</sub> Ni <sub>7</sub> Mo <sub>17</sub>  | -383.44                                 | -383.47                                | 0.64                                           |
| Pt <sub>24</sub> Ni <sub>3</sub> Mo <sub>21</sub>  | -406.43                                 | -406.29                                | -2.91                                          |
| Pt <sub>24</sub> Ni <sub>4</sub> Mo <sub>20</sub>  | -400.42                                 | -400.40                                | -0.39                                          |
| Pt <sub>24</sub> Ni <sub>6</sub> Mo <sub>18</sub>  | -389.48                                 | -389.35                                | -2.84                                          |
| Pt <sub>24</sub> Ni <sub>11</sub> Mo <sub>13</sub> | -361.14                                 | -361.03                                | -2.29                                          |
| Pt <sub>24</sub> Ni <sub>12</sub> Mo <sub>12</sub> | -355.46                                 | -355.43                                | -0.75                                          |
| Pt <sub>24</sub> Ni <sub>13</sub> Mo <sub>11</sub> | -349.31                                 | -349.26                                | -1.17                                          |
| Pt <sub>24</sub> Ni <sub>14</sub> Mo <sub>10</sub> | -343.84                                 | -343.72                                | -2.38                                          |

|                                                    |         |         |       |
|----------------------------------------------------|---------|---------|-------|
| Pt <sub>24</sub> Ni <sub>15</sub> Mo <sub>9</sub>  | -338.31 | -338.19 | -2.60 |
| Pt <sub>24</sub> Ni <sub>16</sub> Mo <sub>8</sub>  | -332.00 | -332.15 | 3.02  |
| Pt <sub>24</sub> Ni <sub>17</sub> Mo <sub>7</sub>  | -325.97 | -326.12 | 3.23  |
| Pt <sub>24</sub> Ni <sub>18</sub> Mo <sub>6</sub>  | -320.17 | -320.05 | -2.46 |
| Pt <sub>24</sub> Ni <sub>19</sub> Mo <sub>5</sub>  | -313.89 | -313.84 | -0.97 |
| Pt <sub>24</sub> Ni <sub>20</sub> Mo <sub>4</sub>  | -308.02 | -307.98 | -0.99 |
| Pt <sub>24</sub> Ni <sub>21</sub> Mo <sub>3</sub>  | -301.80 | -301.79 | -0.16 |
| Pt <sub>24</sub> Ni <sub>22</sub> Mo <sub>2</sub>  | -295.76 | -295.78 | 0.43  |
| Pt <sub>24</sub> Ni <sub>23</sub> Mo <sub>1</sub>  | -289.39 | -289.37 | -0.54 |
| Pt <sub>24</sub> Ni <sub>24</sub> Mo <sub>0</sub>  | -283.46 | -283.35 | -2.24 |
| Pt <sub>36</sub> Ni <sub>12</sub> Mo <sub>0</sub>  | -287.83 | -287.84 | 0.26  |
| Pt <sub>36</sub> Ni <sub>11</sub> Mo <sub>1</sub>  | -294.86 | -294.85 | -0.40 |
| Pt <sub>36</sub> Ni <sub>10</sub> Mo <sub>2</sub>  | -300.86 | -300.89 | 0.55  |
| Pt <sub>36</sub> Ni <sub>9</sub> Mo <sub>3</sub>   | -307.30 | -307.35 | 1.11  |
| Pt <sub>36</sub> Ni <sub>8</sub> Mo <sub>4</sub>   | -313.88 | -313.78 | -2.12 |
| Pt <sub>36</sub> Ni <sub>7</sub> Mo <sub>5</sub>   | -320.46 | -320.51 | 1.20  |
| Pt <sub>36</sub> Ni <sub>6</sub> Mo <sub>6</sub>   | -326.72 | -326.67 | -1.10 |
| Pt <sub>36</sub> Ni <sub>5</sub> Mo <sub>7</sub>   | -332.79 | -332.93 | 2.91  |
| Pt <sub>36</sub> Ni <sub>4</sub> Mo <sub>8</sub>   | -339.15 | -339.17 | 0.40  |
| Pt <sub>36</sub> Ni <sub>3</sub> Mo <sub>9</sub>   | -345.04 | -344.96 | -1.67 |
| Pt <sub>36</sub> Ni <sub>2</sub> Mo <sub>10</sub>  | -351.15 | -351.14 | -0.26 |
| Pt <sub>36</sub> Ni <sub>1</sub> Mo <sub>11</sub>  | -357.54 | -357.41 | -2.70 |
| Pt <sub>36</sub> Ni <sub>0</sub> Mo <sub>12</sub>  | -363.85 | -363.80 | -1.08 |
| Pt <sub>12</sub> Ni <sub>36</sub> Mo <sub>0</sub>  | -276.68 | -276.67 | -0.20 |
| Pt <sub>12</sub> Ni <sub>32</sub> Mo <sub>4</sub>  | -300.07 | -299.79 | -5.80 |
| Pt <sub>12</sub> Ni <sub>28</sub> Mo <sub>8</sub>  | -323.62 | -323.55 | -1.47 |
| Pt <sub>12</sub> Ni <sub>24</sub> Mo <sub>12</sub> | -345.61 | -345.62 | 0.36  |
| Pt <sub>12</sub> Ni <sub>20</sub> Mo <sub>16</sub> | -368.73 | -368.81 | 1.59  |
| Pt <sub>12</sub> Ni <sub>16</sub> Mo <sub>20</sub> | -388.25 | -388.18 | -1.42 |
| Pt <sub>12</sub> Ni <sub>12</sub> Mo <sub>24</sub> | -410.18 | -410.16 | -0.39 |
| Pt <sub>12</sub> Ni <sub>8</sub> Mo <sub>28</sub>  | -429.99 | -429.92 | -1.39 |
| Pt <sub>12</sub> Ni <sub>4</sub> Mo <sub>32</sub>  | -450.27 | -450.36 | 1.74  |
| Pt <sub>12</sub> Ni <sub>0</sub> Mo <sub>36</sub>  | -472.72 | -472.87 | 3.16  |
| Pt <sub>42</sub> Ni <sub>6</sub> Mo <sub>0</sub>   | -289.26 | -289.40 | 3.08  |
| Pt <sub>42</sub> Ni <sub>5</sub> Mo <sub>1</sub>   | -296.08 | -296.31 | 4.74  |
| Pt <sub>42</sub> Ni <sub>4</sub> Mo <sub>2</sub>   | -302.84 | -302.81 | -0.70 |
| Pt <sub>42</sub> Ni <sub>0</sub> Mo <sub>6</sub>   | -328.89 | -328.88 | -0.16 |
| Pt <sub>48</sub> Ni <sub>0</sub> Mo <sub>0</sub>   | -290.97 | -290.90 | -1.44 |
| Pt <sub>6</sub> Ni <sub>42</sub> Mo <sub>0</sub>   | -271.99 | -271.92 | -1.33 |
| Pt <sub>6</sub> Ni <sub>36</sub> Mo <sub>6</sub>   | -306.84 | -306.87 | 0.61  |
| Pt <sub>6</sub> Ni <sub>30</sub> Mo <sub>12</sub>  | -341.45 | -341.06 | -8.27 |



|                                                   |         |         |       |
|---------------------------------------------------|---------|---------|-------|
| Pt <sub>6</sub> Ni <sub>24</sub> Mo <sub>18</sub> | -371.76 | -371.61 | -3.16 |
| Pt <sub>6</sub> Ni <sub>12</sub> Mo <sub>30</sub> | -433.28 | -433.14 | -3.04 |
| Pt <sub>6</sub> Ni <sub>6</sub> Mo <sub>36</sub>  | -466.06 | -465.88 | -3.69 |
| Pt <sub>6</sub> Ni <sub>0</sub> Mo <sub>42</sub>  | -499.03 | -498.95 | -1.64 |
| Pt <sub>0</sub> Ni <sub>48</sub> Mo <sub>0</sub>  | -267.56 | -267.57 | 0.26  |
| Pt <sub>0</sub> Ni <sub>0</sub> Mo <sub>48</sub>  | -525.60 | -525.72 | 2.41  |

**Table S3.** Benchmark for the DFT setups of Monkhorst-Pack k mesh and plane-wave-basis set cutoff energy

| <b>composition</b>                                 | <b>25times-450eV</b> | <b>30times-500eV</b> | <b>E<sub>diff</sub> (eV)</b> |
|----------------------------------------------------|----------------------|----------------------|------------------------------|
| Pt <sub>19</sub> Ni <sub>11</sub> Mo <sub>18</sub> | -383.46              | -383.46              | 0.00                         |
| Pt <sub>19</sub> Ni <sub>5</sub> Mo <sub>24</sub>  | -417.93              | -417.91              | 0.02                         |
| Pt <sub>19</sub> Ni <sub>15</sub> Mo <sub>14</sub> | -363.32              | -363.29              | 0.03                         |
| Pt <sub>19</sub> Ni <sub>9</sub> Mo <sub>20</sub>  | -391.71              | -391.72              | 0.00                         |
| Pt <sub>19</sub> Ni <sub>3</sub> Mo <sub>26</sub>  | -428.38              | -428.38              | 0.00                         |
| Pt <sub>19</sub> Ni <sub>1</sub> Mo <sub>28</sub>  | -438.83              | -438.84              | -0.01                        |
| Pt <sub>19</sub> Ni <sub>17</sub> Mo <sub>12</sub> | -352.90              | -352.92              | -0.02                        |
| Pt <sub>19</sub> Ni <sub>20</sub> Mo <sub>9</sub>  | -335.08              | -335.07              | 0.01                         |
| Pt <sub>19</sub> Ni <sub>25</sub> Mo <sub>4</sub>  | -304.86              | -304.87              | -0.01                        |
| Pt <sub>24</sub> Ni <sub>1</sub> Mo <sub>23</sub>  | -417.63              | -417.63              | 0.00                         |
| Pt <sub>24</sub> Ni <sub>8</sub> Mo <sub>16</sub>  | -379.24              | -379.24              | 0.01                         |
| Pt <sub>24</sub> Ni <sub>2</sub> Mo <sub>22</sub>  | -411.84              | -411.84              | 0.00                         |
| Pt <sub>24</sub> Ni <sub>9</sub> Mo <sub>15</sub>  | -373.23              | -373.24              | -0.01                        |
| Pt <sub>24</sub> Ni <sub>10</sub> Mo <sub>14</sub> | -367.44              | -367.45              | -0.01                        |
| Pt <sub>24</sub> Ni <sub>5</sub> Mo <sub>19</sub>  | -395.36              | -395.39              | -0.03                        |
| Pt <sub>24</sub> Ni <sub>7</sub> Mo <sub>17</sub>  | -383.44              | -383.45              | -0.01                        |
| Pt <sub>24</sub> Ni <sub>3</sub> Mo <sub>21</sub>  | -406.43              | -406.44              | -0.01                        |
| Pt <sub>24</sub> Ni <sub>6</sub> Mo <sub>18</sub>  | -389.48              | -389.52              | -0.03                        |
| Pt <sub>24</sub> Ni <sub>11</sub> Mo <sub>13</sub> | -361.14              | -361.15              | 0.00                         |
| Pt <sub>24</sub> Ni <sub>12</sub> Mo <sub>12</sub> | -355.46              | -355.46              | 0.01                         |
| Pt <sub>24</sub> Ni <sub>15</sub> Mo <sub>9</sub>  | -338.31              | -338.35              | -0.03                        |
| Pt <sub>24</sub> Ni <sub>16</sub> Mo <sub>8</sub>  | -332.00              | -332.02              | -0.02                        |
| Pt <sub>24</sub> Ni <sub>18</sub> Mo <sub>6</sub>  | -320.17              | -320.20              | -0.03                        |
| Pt <sub>24</sub> Ni <sub>19</sub> Mo <sub>5</sub>  | -313.89              | -313.88              | 0.01                         |
| Pt <sub>24</sub> Ni <sub>22</sub> Mo <sub>2</sub>  | -295.76              | -295.79              | -0.03                        |

|                                                    |         |         |       |
|----------------------------------------------------|---------|---------|-------|
| Pt <sub>36</sub> Ni <sub>11</sub> Mo <sub>1</sub>  | -294.86 | -294.88 | -0.02 |
| Pt <sub>36</sub> Ni <sub>10</sub> Mo <sub>2</sub>  | -300.86 | -300.88 | -0.02 |
| Pt <sub>36</sub> Ni <sub>4</sub> Mo <sub>8</sub>   | -339.15 | -339.12 | 0.03  |
| Pt <sub>36</sub> Ni <sub>3</sub> Mo <sub>9</sub>   | -345.04 | -345.02 | 0.02  |
| Pt <sub>36</sub> Ni <sub>2</sub> Mo <sub>10</sub>  | -351.15 | -351.14 | 0.01  |
| Pt <sub>12</sub> Ni <sub>32</sub> Mo <sub>4</sub>  | -300.07 | -300.06 | 0.01  |
| Pt <sub>12</sub> Ni <sub>28</sub> Mo <sub>8</sub>  | -323.62 | -323.63 | -0.01 |
| Pt <sub>12</sub> Ni <sub>24</sub> Mo <sub>12</sub> | -345.61 | -345.60 | 0.01  |
| Pt <sub>12</sub> Ni <sub>20</sub> Mo <sub>16</sub> | -368.73 | -368.76 | -0.02 |
| Pt <sub>12</sub> Ni <sub>8</sub> Mo <sub>28</sub>  | -429.99 | -430.01 | -0.02 |
| Pt <sub>6</sub> Ni <sub>36</sub> Mo <sub>6</sub>   | -306.84 | -306.80 | 0.03  |
| Pt <sub>6</sub> Ni <sub>30</sub> Mo <sub>12</sub>  | -341.45 | -341.47 | -0.02 |
| Pt <sub>6</sub> Ni <sub>24</sub> Mo <sub>18</sub>  | -371.76 | -371.80 | -0.03 |
| Pt <sub>6</sub> Ni <sub>12</sub> Mo <sub>30</sub>  | -433.28 | -433.29 | -0.01 |
| Pt <sub>19</sub> Ni <sub>11</sub> Mo <sub>18</sub> | -383.46 | -383.46 | 0.00  |
| Pt <sub>19</sub> Ni <sub>5</sub> Mo <sub>24</sub>  | -417.93 | -417.91 | 0.02  |
| Pt <sub>19</sub> Ni <sub>15</sub> Mo <sub>14</sub> | -363.32 | -363.29 | 0.03  |
| Pt <sub>19</sub> Ni <sub>9</sub> Mo <sub>20</sub>  | -391.71 | -391.72 | 0.00  |
| Pt <sub>19</sub> Ni <sub>3</sub> Mo <sub>26</sub>  | -428.38 | -428.38 | 0.00  |
| Pt <sub>19</sub> Ni <sub>1</sub> Mo <sub>28</sub>  | -438.83 | -438.84 | -0.01 |
| Pt <sub>19</sub> Ni <sub>17</sub> Mo <sub>12</sub> | -352.90 | -352.92 | -0.02 |
| Pt <sub>19</sub> Ni <sub>20</sub> Mo <sub>9</sub>  | -335.08 | -335.07 | 0.01  |
| Pt <sub>19</sub> Ni <sub>25</sub> Mo <sub>4</sub>  | -304.86 | -304.87 | -0.01 |
| Pt <sub>24</sub> Ni <sub>1</sub> Mo <sub>23</sub>  | -417.63 | -417.63 | 0.00  |
| Pt <sub>24</sub> Ni <sub>8</sub> Mo <sub>16</sub>  | -379.24 | -379.24 | 0.01  |
| Pt <sub>24</sub> Ni <sub>2</sub> Mo <sub>22</sub>  | -411.84 | -411.84 | 0.00  |
| Pt <sub>24</sub> Ni <sub>9</sub> Mo <sub>15</sub>  | -373.23 | -373.24 | -0.01 |
| Pt <sub>24</sub> Ni <sub>10</sub> Mo <sub>14</sub> | -367.44 | -367.45 | -0.01 |
| Pt <sub>24</sub> Ni <sub>5</sub> Mo <sub>19</sub>  | -395.36 | -395.39 | -0.03 |
| Pt <sub>24</sub> Ni <sub>7</sub> Mo <sub>17</sub>  | -383.44 | -383.45 | -0.01 |
| Pt <sub>24</sub> Ni <sub>3</sub> Mo <sub>21</sub>  | -406.43 | -406.44 | -0.01 |
| Pt <sub>24</sub> Ni <sub>6</sub> Mo <sub>18</sub>  | -389.48 | -389.52 | -0.03 |
| Pt <sub>24</sub> Ni <sub>11</sub> Mo <sub>13</sub> | -361.14 | -361.15 | 0.00  |
| Pt <sub>24</sub> Ni <sub>12</sub> Mo <sub>12</sub> | -355.46 | -355.46 | 0.01  |
| Pt <sub>24</sub> Ni <sub>15</sub> Mo <sub>9</sub>  | -338.31 | -338.35 | -0.03 |

|                                                   |         |         |       |
|---------------------------------------------------|---------|---------|-------|
| Pt <sub>24</sub> Ni <sub>16</sub> Mo <sub>8</sub> | -332.00 | -332.02 | -0.02 |
| Pt <sub>24</sub> Ni <sub>18</sub> Mo <sub>6</sub> | -320.17 | -320.20 | -0.03 |
| Pt <sub>24</sub> Ni <sub>19</sub> Mo <sub>5</sub> | -313.89 | -313.88 | 0.01  |
| Pt <sub>24</sub> Ni <sub>22</sub> Mo <sub>2</sub> | -295.76 | -295.79 | -0.03 |
| Pt <sub>36</sub> Ni <sub>11</sub> Mo <sub>1</sub> | -294.86 | -294.88 | -0.02 |
| Pt <sub>36</sub> Ni <sub>10</sub> Mo <sub>2</sub> | -300.86 | -300.88 | -0.02 |
| Pt <sub>36</sub> Ni <sub>4</sub> Mo <sub>8</sub>  | -339.15 | -339.12 | 0.03  |
| Pt <sub>36</sub> Ni <sub>3</sub> Mo <sub>9</sub>  | -345.04 | -345.02 | 0.02  |
| Pt <sub>36</sub> Ni <sub>2</sub> Mo <sub>10</sub> | -351.15 | -351.14 | 0.01  |

### 1.3 Calculation Details of GCMC/SSW-NN method

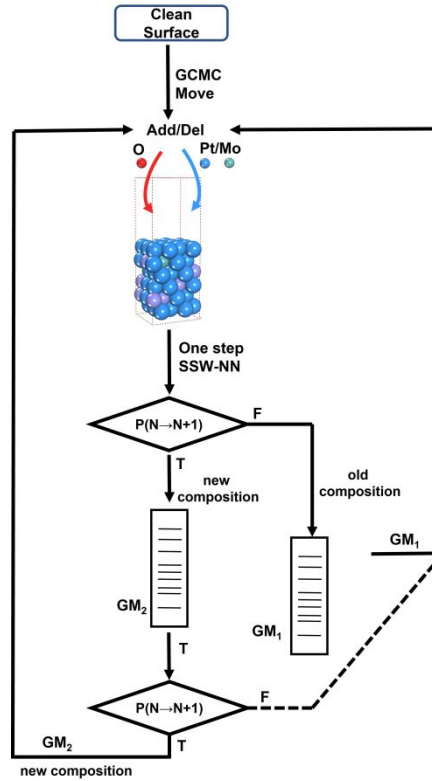

**Scheme S3.** Overall procedure of the GCMC/SSW-NN method.

#### Upper limit of surface Mo coverage in GCMC/SSW-NN simulations

The upper limit of surface Mo coverage during GCMC/SSW-NN simulations is restricted to below 0.2 monolayer (ML). This is because, in practice, the amount of surface Mo is limited, which is determined by the size of nanoparticle. In experiment, the size of PtNiMo nanoparticle is typical around 4.1 nm<sup>6</sup>. In this case, Wulff construction shows that the upper limit of surface Mo coverage is 0.2 ML. The details are described as follows.

Wulff construction states that a particle reaches the lowest surface free energy when its shape satisfies the criterion that the surface energy ( $\gamma_i$ ) of a given face is proportional to the distance  $h_i$

from the center of the polyhedron to that surface, as shown in Eq. 10-11.

$$\gamma_i/h_i = \text{constant}\#(10.)$$

$$\gamma_i = [E_{slab} - N * E_{bulk}]/2A\#(11.)$$

Here we set  $\gamma_{(111)} = 1.41 \text{ J/m}^2$  and  $\gamma_{(100)} = 1.61 \text{ J/m}^2$ , respectively. According to Wulff construction, the equilibrium shape of PtNiMo is cuboctahedral, which exposes eight  $\{111\}$  and six  $\{100\}$  (see Figure 1)<sup>6-7</sup>. The particle size is defined by the distance between  $(111)$  and  $(\bar{1}\bar{1}\bar{1})$ , which is denoted as  $d_{(111)}$ . We set the  $d_{(111)}$  to 4.1 nm, and obtain the side length of  $(100)$  surface is 3 nm and its area is  $9 \text{ nm}^2$  for each face. The side length of  $(111)$  is 3.1 nm and its area is  $25.73 \text{ nm}^2$  (see Figure S1b). Altogether, the total area of six  $(100)$  surfaces and eight  $(111)$  surfaces is  $259.83 \text{ nm}^2$ , and the volume of PtNiMo particle is  $322.67 \text{ nm}^3$ . The total number of atoms is 22019. According to the ratio of the surface area to volume, it indicates that the number of surface atoms is 1774, and the total number of Mo (at 1.6% Mo content) in the particle is 353. Thus, the upper limit of surface Mo is  $353/1774 = 0.20 \text{ ML}$ .

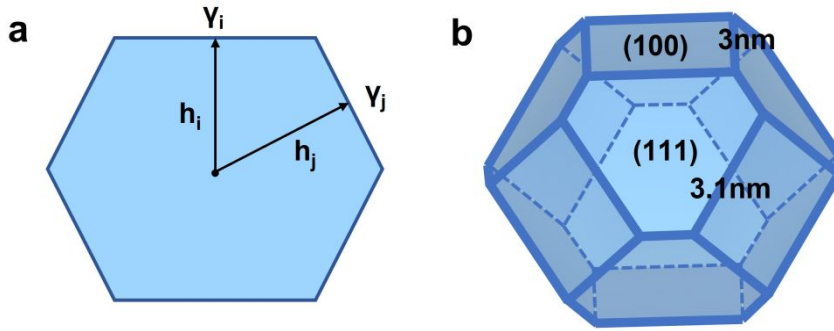

**Figure S1.** (a) Illustration of the Wulff construction. (b) Wulff shape of PtNiMo nanoparticles with  $d_{(111)} = 4.1 \text{ nm}$ .

### Chemical potentials for Mo

To calculate the chemical potential of Mo, we calculated all forms that can appear in nature, either neutral metal atoms in bulk phase or free ions in the electrolyte from experiments.

- (i) Neutral Mo metal atoms in bulk PtNiMo alloy

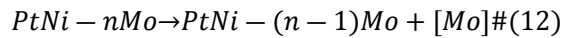

where  $[Mo]$  represents an atom in the reservoir. In this case, the chemical potential of Mo is then defined as

$$\mu_{Mo'} = G(PtNi - nMo) - G[PtNi - (n - 1)Mo] = -13.23eV\#(13)$$

- (ii)  $Mo^{3+}$  cation in electrolyte

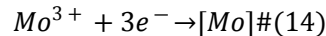

where  $[Mo]$  represents an atom in the reservoir. The chemical potential of Mo is defined as

$$\mu_{Mo''} = \mu_{Mo^{3+}} + 3\mu_{e^-}\#(15)$$

$\mu_{Mo^{3+}}$  is the electrochemical potential of  $Mo^{3+}$ ,  $\mu_{e^-}$  is the electrochemical potential of electron.  $\mu_{Mo^{3+}}$  can be derived by the redox reaction on the  $Mo^{3+}/Mo$  electrode:

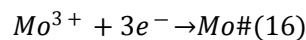

At the standard electrode potential ( $E_{Mo^{3+}/Mo}^0$ ) and standard conditions, the redox reaction is in equilibrium, and thereby

$$\Delta G = G_{Mo}^0 - \mu_{Mo^{3+}}^0 - 3\mu_{e_{Mo^{3+}/Mo}} = 0 \#(17)$$

$$\mu_{Mo^{3+}}^0 = G_{Mo}^0 - 3\mu_{e_{Mo^{3+}/Mo}} \#(18)$$

where  $\mu_{Mo^{3+}}^0$  is the electrochemical potential of  $Mo^{3+}$  at standard conditions ( $c^0 = 1$  M),  $\mu_{e_{Mo^{3+}/Mo}}$  is the electrochemical potential of electron in the  $Mo^{3+}/Mo$  electrode. For  $Mo^{3+}$  with other concentrations ( $c$ ), we get

$$\mu_{Mo^{3+}} = \mu_{Mo^{3+}}^0 - 3\mu_{e_{Mo^{3+}/Mo}} + k_B T \ln(c/c^0) \#(19)$$

The concentration of Mo is set as  $c = 10^{-4}$  mol/L. Substituting Eq. 19 into Eq. 15, we get

$$\mu_{Mo''} = \mu_{Mo^{3+}} + 3\mu_{e^-} = G_{Mo}^0 - 3\mu_{e_{Mo^{3+}/Mo}} + k_B T \ln(c/c^0) + 3\mu_{e^-} \quad (20)$$

Reformulate Eq. (22), we get

$$\begin{aligned} \mu_{Mo''} &= G_{Mo}^0 - 3\mu_{e_{Mo^{3+}/Mo}} + k_B T \ln(c/c^0) + 3\mu_{e^-} \\ &= G_{Mo}^0 + 3(\mu_e^{SHE} - \mu_{e_{Mo^{3+}/Mo}}) + k_B T \ln(c/c^0) - 3(\mu_e^{SHE} - \mu_{e^-}) \end{aligned} \quad (21)$$

where  $\mu_e^{SHE}$  is the electrochemical potential of electron in SHE. Since the electrode potential  $U$  is defined as

$$U = \frac{(\mu_e^{SHE} - \mu_{e^-})}{e} \quad (22)$$

Where  $U$  is the electrode potential vs. SHE, while  $e$  is the element charge. Substituting Eq. 22 into Eq. 23, we get

$$\begin{aligned} \mu_{Mo''} &= G_{Mo}^0 + 3(\mu_e^{SHE} - \mu_{e_{Mo^{3+}/Mo}}) + k_B T \ln(c/c^0) - 3(\mu_e^{SHE} - \mu_{e^-}) \\ &= G_{Mo}^0 + 3E_{Mo^{3+}/Mo}^0 + k_B T \ln(c/c^0) - 3eU \end{aligned} \quad (23)$$

At  $U = 0.9$  V, the  $\mu_{Mo''}$  is calculated to be

$$\mu_{Mo''} = -14.49 \text{ eV} \quad (24)$$

(iii)  $H_2MoO_4(aq)$  in the electrolyte

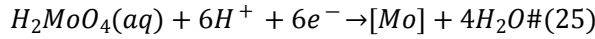

where  $[Mo]$  represents an atom in the reservoir. The chemical potential of Mo is defined as

$$\mu_{Mo'''} = G_{H_2MoO_4} + 6\mu_{H^+} + 6\mu_{e^-} - 4G_{H_2O} \#(26)$$

$\mu_{H^+}$  is the electrochemical potential of  $H^+(aq)$ .  $G_{H_2MoO_4}$  can be derived by the redox reaction on the  $H_2MoO_4/Mo$  electrode:

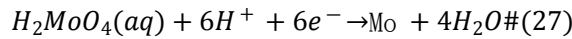

At the standard electrode potential ( $E_{H_2MoO_4/Mo}^0$ ) and standard conditions, the above redox reaction is in equilibrium, and thereby

$$\mu_{H_2MoO_4}^0 = G_{Mo}^0 + 4G_{H_2O}^0 - 6\mu_{H^+}^0 - 6\mu_{e_{H_2MoO_4/Mo}} \#(28)$$

Substituting Eq. 28 into Eq. 26, we get

$$\begin{aligned} \mu_{Mo'''} &= G_{H_2MoO_4} + 6\mu_{H^+} + 6\mu_{e^-} - 4G_{H_2O} \\ &= G_{Mo}^0 + 4G_{H_2O}^0 - 6\mu_{H^+}^0 - 6\mu_{e_{H_2MoO_4/Mo}} + k_B T \ln(c/c^0) + 6\mu_{H^+}^0 + 6\mu_{e^-} - 4G_{H_2O}^0 \# \\ &= G_{Mo}^0 - 6\mu_{e_{H_2MoO_4/Mo}} + k_B T \ln(c/c^0) + 6\mu_{e^-} \\ &= G_{Mo}^0 + 6(\mu_e^{SHE} - \mu_{e_{H_2MoO_4/Mo}}) + k_B T \ln(c/c^0) - 6(\mu_e^{SHE} - \mu_{e^-}) \\ &= G_{Mo}^0 + 6E_{H_2MoO_4/Mo}^0 + k_B T \ln(c/c^0) - 6eU \end{aligned} \quad (29)$$

The concentration of  $H_2MoO_4$  is set as  $c = 10^{-4}$  mol/L. The  $\mu_{Mo'''}$  is calculated to be

$$\mu_{Mo'''} = -15.93 \text{ eV} \quad (30)$$

The final  $\mu_{Mo}$  is then the maximum of  $\mu_{Mo'}$ ,  $\mu_{Mo''}$ , and  $\mu_{Mo'''}$

$$\mu_{Mo} = \max\{\mu_{Mo'}, \mu_{Mo''}, \mu_{Mo'''}\} = -13.23 \text{ eV} \#(31)$$

**Table S4.** Chemical potentials of Mo derived from Eq. 13 with different Mo contents

| Mo%   | Reactions                                                                                          | $\mu_{\text{Mo}}$ (eV) |
|-------|----------------------------------------------------------------------------------------------------|------------------------|
| 2.08% | $\text{Pt}_{36}\text{Ni}_{11}\text{Mo}_1 \rightarrow \text{Pt}_{36}\text{Ni}_{11} + [\text{Mo}]$   | -13.23                 |
| 1.39% | $\text{Pt}_{54}\text{Ni}_{17}\text{Mo}_1 \rightarrow \text{Pt}_{54}\text{Ni}_{17} + [\text{Mo}]$   | -13.30                 |
| 0.55% | $\text{Pt}_{135}\text{Ni}_{44}\text{Mo}_1 \rightarrow \text{Pt}_{135}\text{Ni}_{44} + [\text{Mo}]$ | -13.38                 |

**Chemical potential for Pt**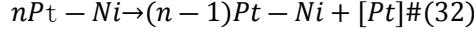

$$\mu_{\text{Pt}} = G(n\text{Pt} - \text{Ni}) - G[(n-1)\text{Pt} - \text{Ni}] = -6.21\text{eV} \#(33)$$

**Chemical potential for O**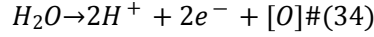

$$\mu_{\text{O}} = G_{\text{H}_2\text{O}}^0 - 2\mu_{\text{H}^+}^0 - 2\mu_{\text{e}^-} \#(35)$$

For the Standard Hydrogen Electrode (SHE:  $\text{H}^+ + \text{e}^- \rightarrow 1/2 \text{H}_2$ , pH = 0, p = 1bar, T = 298.15 K) as reference, where we get

$$\Delta G = \frac{1}{2}G_{\text{H}_2}^0 - 2\mu_{\text{H}^+}^0 - \mu_{\text{e}^-}^{\text{SHE}} = 0 \#(36)$$

$\mu_{\text{H}^+}$  can be estimated as

$$\mu_{\text{H}^+}^0 = \frac{1}{2}G^0(\text{H}_2) - \mu_{\text{e}^-}^{\text{SHE}} \#(37)$$

Substituting Eq. 37 into Eq. 35, we get

$$\begin{aligned} \mu_{\text{O}} &= G_{\text{H}_2\text{O}}^0 - 2\mu_{\text{H}^+}^0 - 2\mu_{\text{e}^-} \\ &= G_{\text{H}_2\text{O}}^0 - 2\left(\frac{1}{2}G^0(\text{H}_2) - \mu_{\text{e}^-}^{\text{SHE}}\right) - 2\mu_{\text{e}^-} \quad (38) \\ &= G_{\text{H}_2\text{O}}^0 - G^0(\text{H}_2) + 2(\mu_{\text{e}^-}^{\text{SHE}} - \mu_{\text{e}^-}) \\ &= G_{\text{H}_2\text{O}}^0 - G^0(\text{H}_2) + 2eU = -5.62\text{eV} \end{aligned}$$

The [Pt], [Mo], and [O] represent an atom in the reservoir,  $G(n\text{Pt}-\text{Ni})$ ,  $G[(n-1)\text{Pt}-\text{Ni}]$ ,  $G(\text{PtNi}-n\text{Mo})$ , and  $G[\text{PtNi}-(n-1)\text{Mo}]$  are energies of GM for the corresponding bulk phase determined by SSW-NN. In Eq. 13, we use two PtNiMo bulks with of  $\text{Pt}_{54}\text{Ni}_{18}$  for nPt-Ni and  $\text{Pt}_{53}\text{Ni}_{18}$  for (n-1)Pt-Ni.  $G(\text{Pt})$  and  $G(\text{Mo})$  are the Gibbs free energy of pure Pt and Mo metals.  $E_{\text{Mo}^{3+}/\text{Mo}}^0$ , and  $E_{\text{H}_2\text{MoO}_4/\text{Mo}}^0$  are standard electrode potentials from experiments<sup>8-9</sup>. The concentration of ions (Eq. 19, 20, 21, 23, and 29) are set as  $c = 10^{-4}$  mol/L.

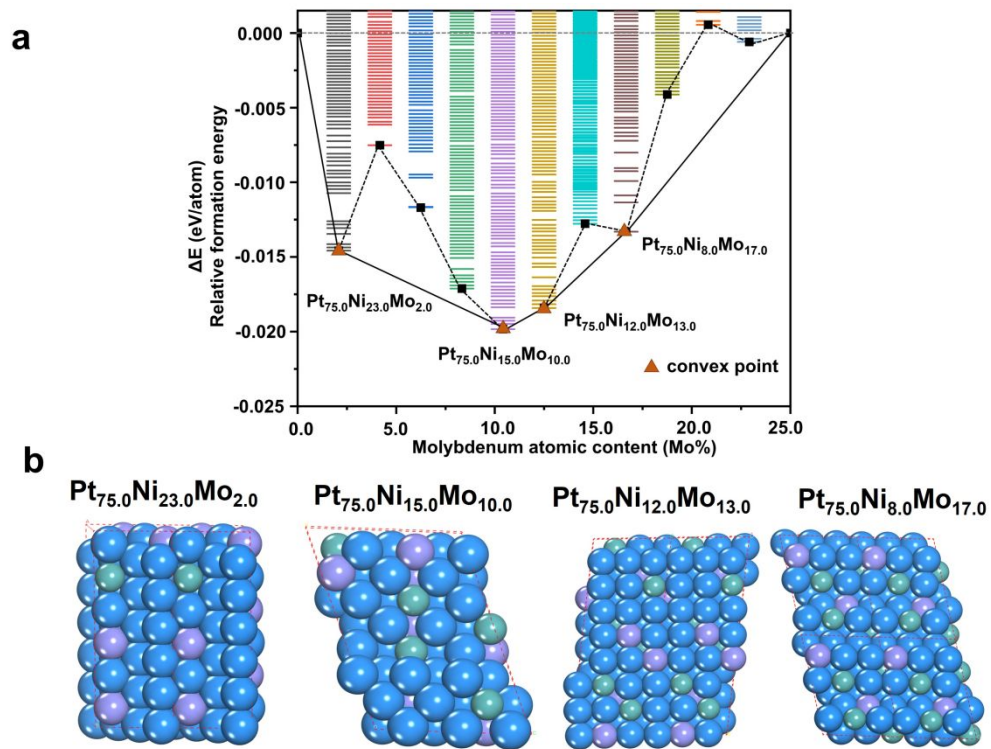

**Figure S2.** (a) Thermodynamic convex hull diagram of  $\text{Pt}_{75.0}\text{Ni}_{25.0-x}\text{Mo}_x$ ; (b) GM structures of the convex points. Blue balls are Pt; violet balls are Ni; cyan balls are Mo.

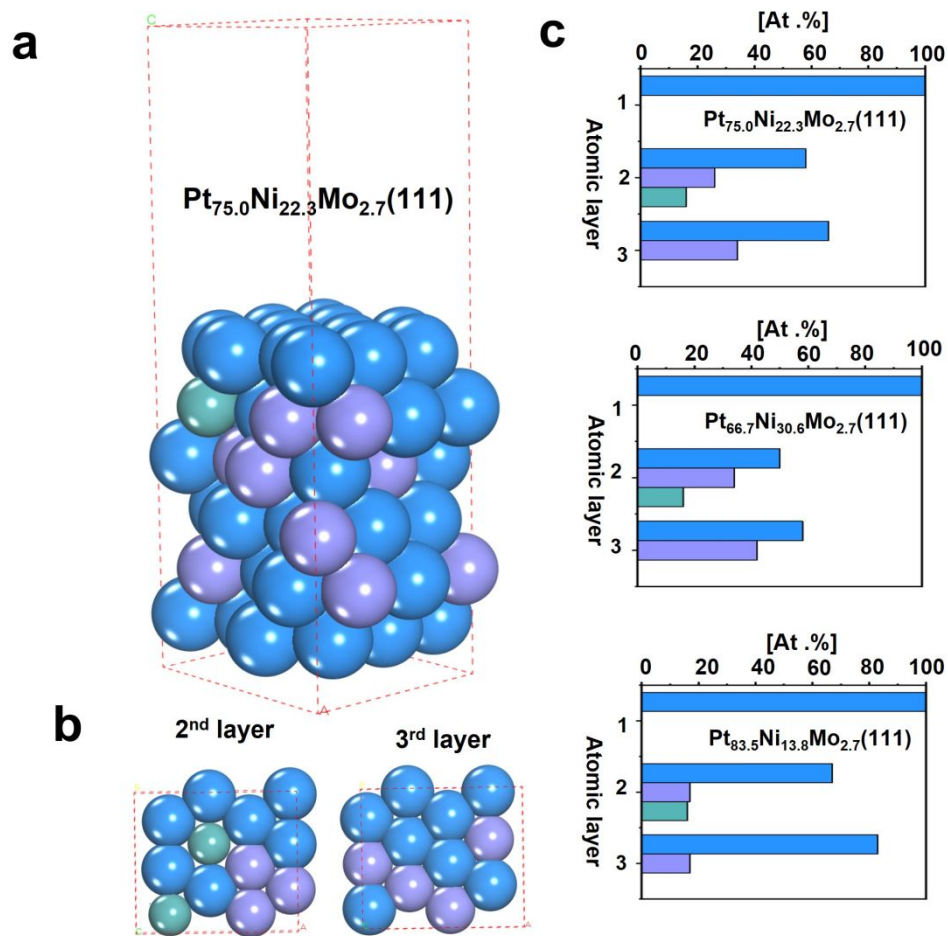

**Figure S3.** (a) Sideview of GM structure for the  $\text{Pt}_{75.0}\text{Ni}_{22.3}\text{Mo}_{2.7}(111)$ ; (b) Cross section for the 1<sup>st</sup> and 2<sup>nd</sup> atomic layer of  $\text{Pt}_{75.0}\text{Ni}_{22.3}\text{Mo}_{2.7}(111)$ . (c) Atomic contents for the first three surface layers of  $\text{Pt}_{75.0}\text{Ni}_{22.3}\text{Mo}_{2.7}(111)$ ,  $\text{Pt}_{66.7}\text{Ni}_{30.6}\text{Mo}_{2.7}(111)$ , and  $\text{Pt}_{83.5}\text{Ni}_{13.8}\text{Mo}_{2.7}(111)$ .



## 2. GCMC/SSW-NN trajectory of $\text{Pt}_{75.0}\text{Ni}_{25.0}$ surface

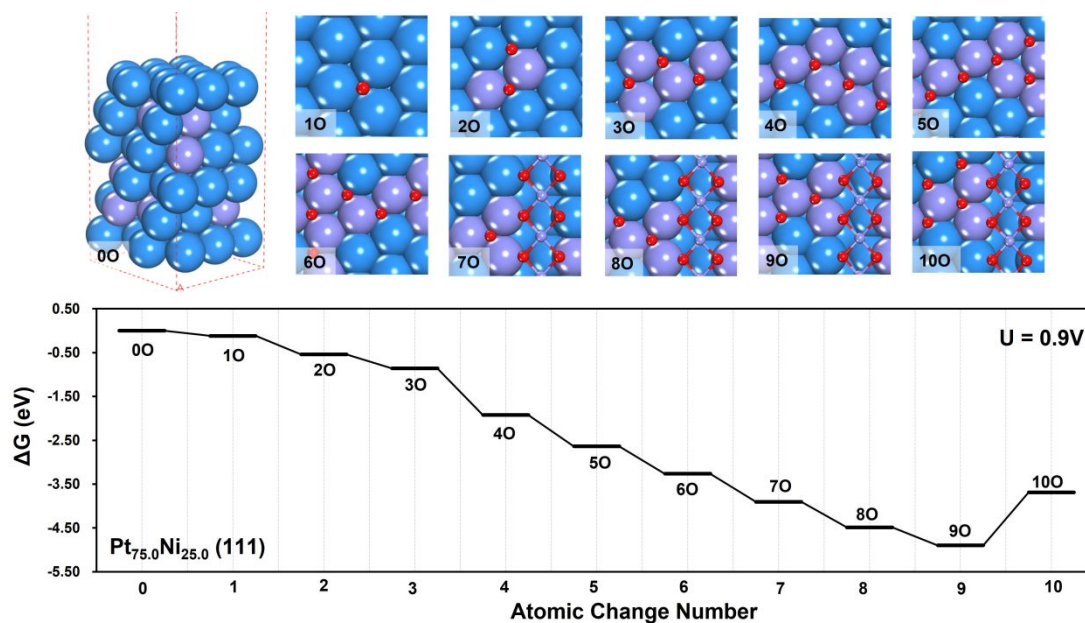

**Figure S4.** Structures and energetic profiles for the intermediate states and the evolution of  $\text{Pt}_{75.0}\text{Ni}_{25.0}$  (111) at 0.9V vs. RHE. Each state is named as  $n\text{O} + m\text{Pt}$ , where  $n$  and  $m$  represent the number of O and Pt atoms that are added in the unit cell at the current GCMC step. The atoms above the surface plane are depicted in the ball-and-stick style, while other atoms are depicted in the CPK style. Colors in figure: Blue balls are Pt; Violet balls are Ni; Cyan balls are Mo; Red balls are O.

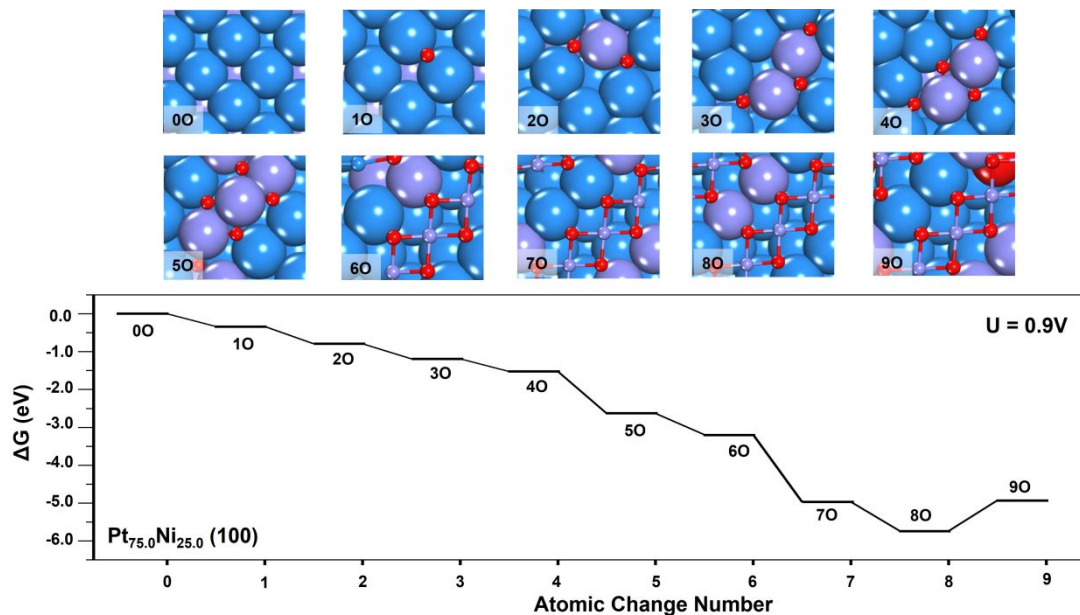

**Figure S5.** Structures and energetic profiles for the intermediate states and the evolution of  $\text{Pt}_{75.0}\text{Ni}_{25.0}$  (100) at 0.9V vs. RHE. Each state is named as  $n\text{O} + m\text{Pt}$ , where  $n$  and  $m$  represent the number of O and Pt atoms that are added in the unit cell at the current GCMC step. The atoms above the surface plane are depicted in the ball-and-stick style, while other atoms are depicted in the CPK style. Colors in figure: Blue balls are Pt; Violet balls are Ni; Cyan balls are Mo; Red balls are O.

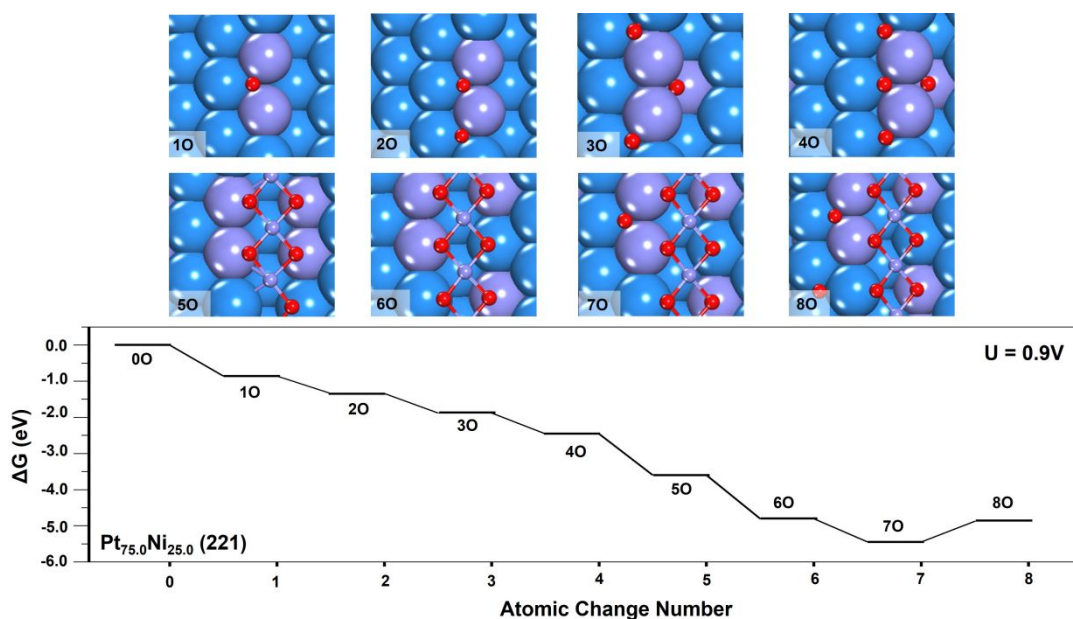

**Figure S6.** Structures and energetic profiles for the intermediate states and the evolution of  $\text{Pt}_{75.0}\text{Ni}_{25.0}$  (221) at 0.9V vs. RHE. Each state is named as  $n\text{O} + m\text{Pt}$ , where  $n$  and  $m$  represent the number of O and Pt atoms that are added in the unit cell at the current GCMC step. The atoms above the surface plane are depicted in the ball-and-stick style, while other atoms are depicted in the CPK style. Colors in figure: Blue balls are Pt; Violet balls are Ni; Cyan balls are Mo; Red balls are O.

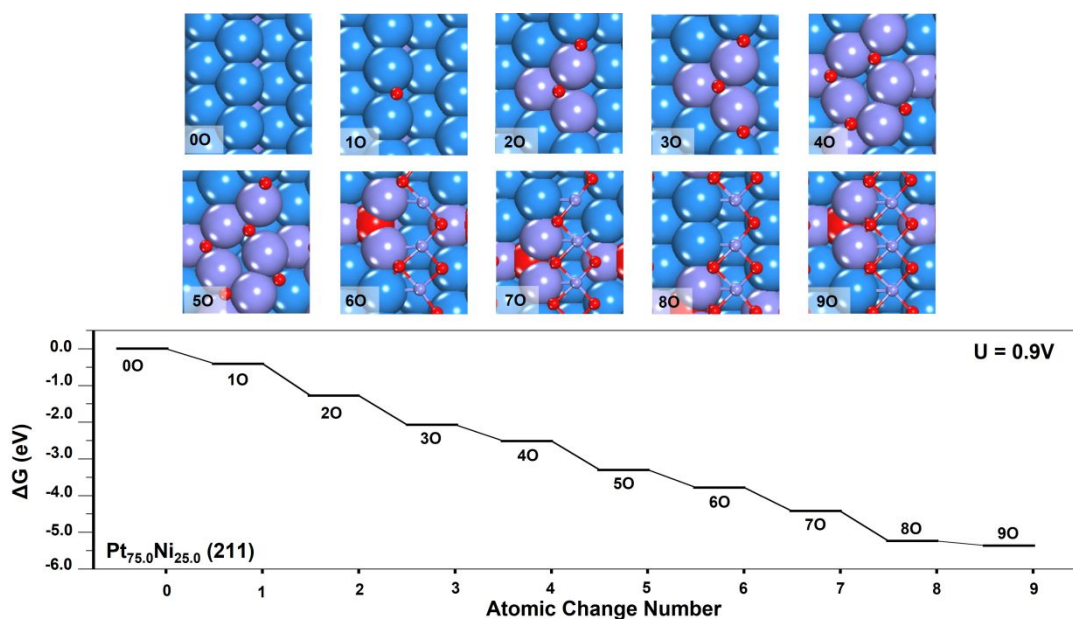

**Figure S7.** Structures and energetic profiles for the intermediate states and the evolution of  $\text{Pt}_{75.0}\text{Ni}_{25.0}$  (211) at 0.9V vs. RHE. Each state is named as  $n\text{O} + m\text{Pt}$ , where  $n$  and  $m$  represent the number of O and Pt atoms that are added in the unit cell at the current GCMC step. The atoms above the surface plane are depicted in the ball-and-stick style, while other atoms are depicted in the CPK style. Colors in figure: Blue balls are Pt; Violet balls are Ni; Cyan balls are Mo; Red balls are O.

### 3. GCMC/SSW-NN trajectories of PtNiMo Surfaces

Due to the importance of the surface  $^*\text{MoO}_4$ , it is intriguing to investigate the formation mechanism of  $^*\text{MoO}_4$ . To this end, we take a close look at the GCMC/SSW-NN trajectory of the  $\text{Pt}_{75.0}\text{Ni}_{22.3}\text{Mo}_{2.7}$  (111) surface at  $0.9V_{\text{RHE}}$ , as shown in Figure S8. The bare surface ( $^*0\text{O}$  state) contains two Mo atoms at the subsurface in each unit cell. Then, one O atom attaches on the surface, whilst one Mo atom migrates on the surface, forming a metal-oxo complex,  $^*\text{Mo}=\text{O}$  ( $^*1\text{O}$  state). Next, the second terminal  $^*\text{Mo}=\text{O}$  group forms by adding another O on the surface ( $^*2\text{O}$  state). Then, the third O atom is added on the surface, which links two  $\text{Mo}=\text{O}$  groups to a  $^*\text{Mo}^{\#}\text{O}_2\text{-O-Mo}$  moiety ( $^*3\text{O}$  state). The superscript “ $\#$ ” indicates that this Mo atom leaches out from the lattice site, leaving a lattice vacancy beneath the  $\text{Mo}^{\#}$  atom. The fourth O attaches on the leached  $\text{Mo}^{\#}$  atom to form a  $\text{Mo}^{\#}\text{O}_3\text{-O-Mo}$  moiety ( $^*4\text{O}$  state). Meanwhile, the lattice vacancy moves from the surface to the third layer of the slab. Subsequently, a Pt atom is added to this system to heal this lattice vacancy ( $4\text{O}+1\text{Pt}$  state). The fifth O atom is added to the  $^*\text{Mo}^{\#}\text{O}_3\text{-O-Mo}$  moiety to form a  $^*\text{Mo}^{\#}\text{O}_2\text{-O-}^*\text{Mo}^{\#}\text{O}_2$  group ( $5\text{O}+1\text{Pt}$  state). In this state, the remaining lattice Mo leaches out of the surface, while the lattice vacancy site locates at the second atomic layer of the slab. The sixth O atom attaches to the surface to form a  $^*\text{Mo}^{\#}\text{O}_3\text{-O-}^*\text{Mo}^{\#}\text{O}_2$  group. The seventh O attaches on the surface to further form a  $^*\text{Mo}^{\#}\text{O}_3\text{-O-}^*\text{Mo}^{\#}\text{O}_3$  group. Then, the second Pt atom is added to the system to fill the lattice vacancy at the second atomic layer. Finally, the eighth O is added on the  $^*\text{Mo}^{\#}\text{O}_3\text{-O-}^*\text{Mo}^{\#}\text{O}_3$  moiety to form two tetrahedral-coordinated  $^*\text{Mo}^{\#}\text{O}_4$  groups, and further addition of O atoms to the  $9\text{O}+2\text{Pt}$  state is endothermal.

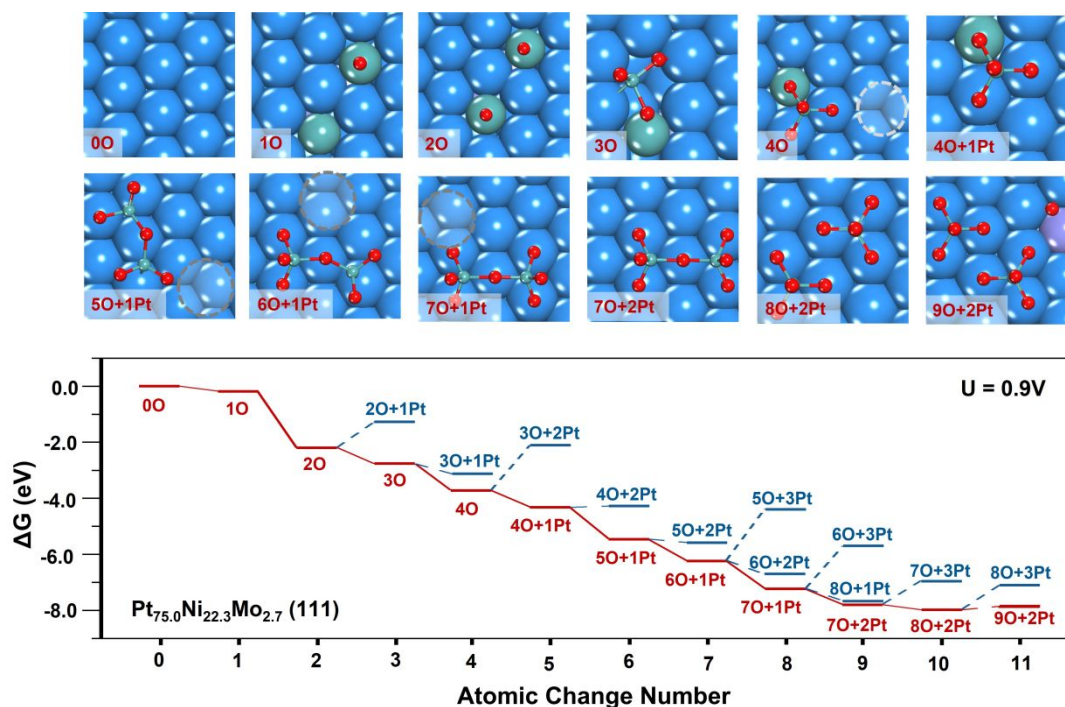

**Figure S8.** Structures and energetic profiles for the intermediate states and the evolution of  $\text{Pt}_{75.0}\text{Ni}_{22.3}\text{Mo}_{2.7}$  (111) at  $0.9V$  vs. RHE. Each state is named as  $n\text{O} + m\text{Pt}$ , where  $n$  and  $m$  represent the number of O and Pt atoms that are added in the unit cell at the current GCMC step. The atoms above the surface plane are depicted in the ball-and-stick style, while other atoms are depicted in the CPK style. Colors in figure: Blue balls are Pt; Violet balls are Ni; Cyan balls are Mo; Red balls are O.

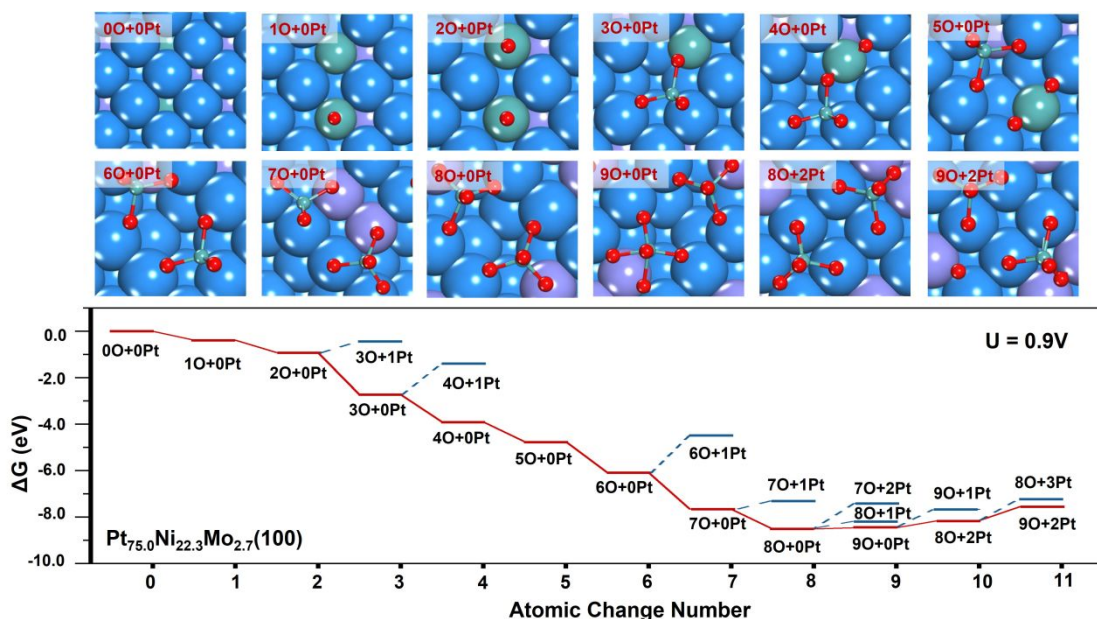

**Figure S9.** Structures and energetic profiles for the intermediate states and the evolution of  $\text{Pt}_{75.0}\text{Ni}_{22.3}\text{Mo}_{2.7}(100)$  at  $0.9\text{V}$  vs. RHE. Each state is named as  $n\text{O} + m\text{Pt}$ , where  $n$  and  $m$  represent the number of O and Pt atoms that are added in the unit cell at the current GCMC step. The atoms above the surface plane are depicted in the ball-and-stick style, while other atoms are depicted in the CPK style. Colors in figure: Blue balls are Pt; Violet balls are Ni; Cyan balls are Mo; Red balls are O.

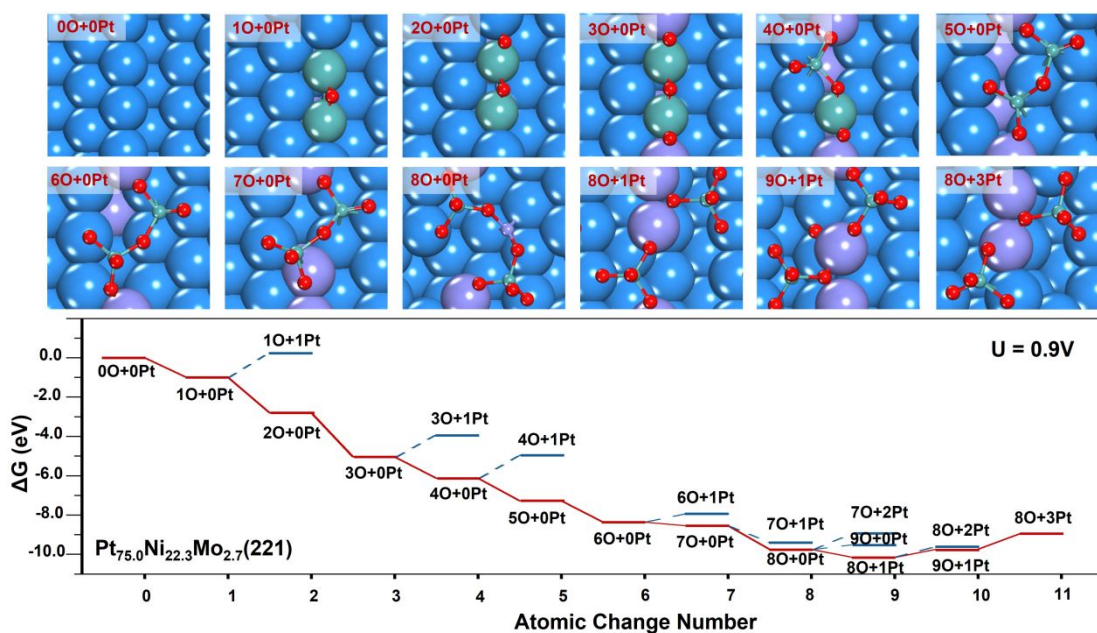

**Figure S10.** Structures and energetic profiles for the intermediate states and the evolution of  $\text{Pt}_{75.0}\text{Ni}_{22.3}\text{Mo}_{2.7}(221)$  at  $0.9\text{V}$  vs. RHE. Each state is named as  $n\text{O} + m\text{Pt}$ , where  $n$  and  $m$  represent the number of O and Pt atoms that are added in the unit cell at the current GCMC step. The atoms above the surface plane are depicted in the ball-and-stick style, while other atoms are depicted in the CPK style. Colors in figure: Blue balls are Pt; Violet balls are Ni; Cyan balls are Mo; Red balls are O.

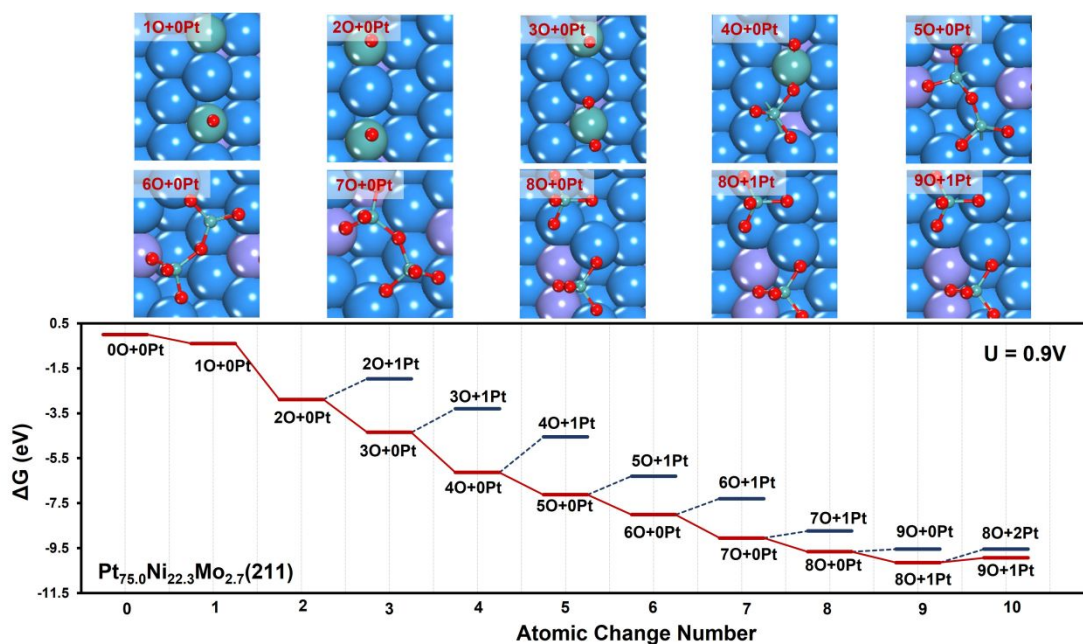

**Figure S11.** Structures and energetic profiles for the intermediate states and the evolution of  $\text{Pt}_{75.0}\text{Ni}_{22.3}\text{Mo}_{2.7}(211)$  at 0.9V vs. RHE. Each state is named as  $n\text{O} + m\text{Pt}$ , where  $n$  and  $m$  represent the number of O and Pt atoms that are added in the unit cell at the current GCMC step. The atoms above the surface plane are depicted in the ball-and-stick style, while other atoms are depicted in the CPK style. Colors in figure: Blue balls are Pt; Violet balls are Ni; Cyan balls are Mo; Red balls are O.

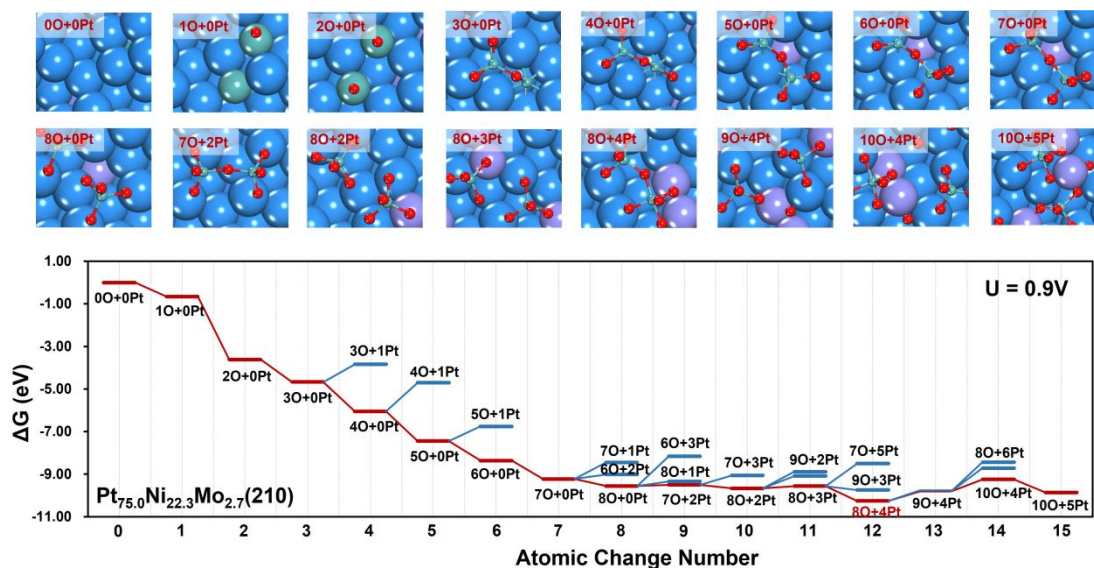

**Figure S12.** Structures and energetic profiles for the intermediate states and the evolution of  $\text{Pt}_{75.0}\text{Ni}_{22.3}\text{Mo}_{2.7}(210)$  at 0.9V vs. RHE. Each state is named as  $n\text{O} + m\text{Pt}$ , where  $n$  and  $m$  represent the number of O and Pt atoms that are added in the unit cell at the current GCMC step. The atoms above the surface plane are depicted in the ball-and-stick style, while other atoms are depicted in the CPK style. Colors in figure: Blue balls are Pt; Violet balls are Ni; Cyan balls are Mo; Red balls are O.

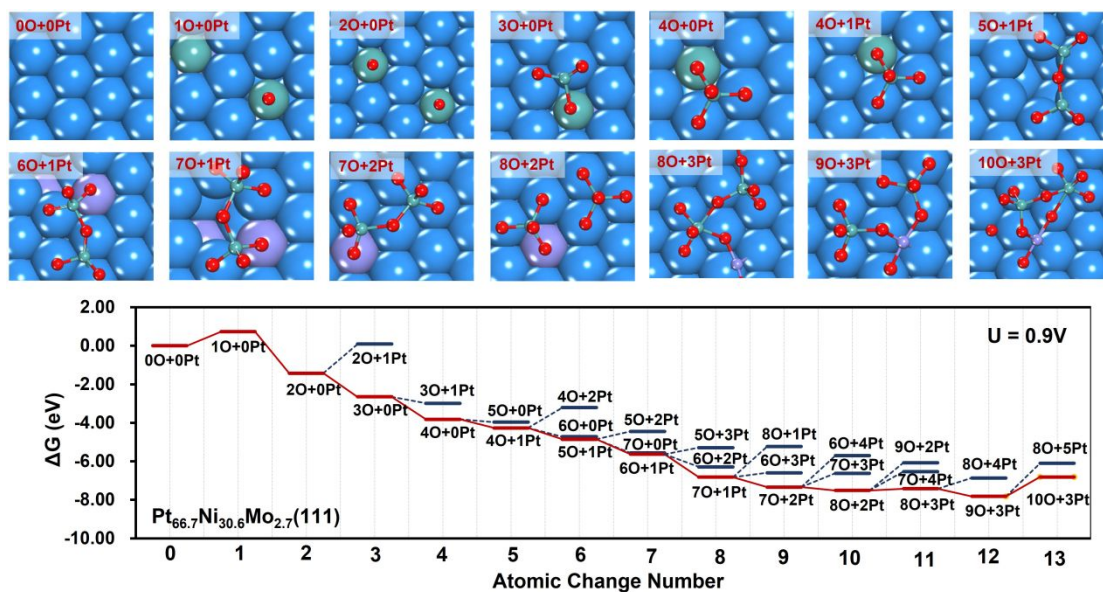

**Figure S13.** Structures and energetic profiles for the intermediate states and the evolution of  $\text{Pt}_{66.7}\text{Ni}_{30.6}\text{Mo}_{2.7}(111)$  at 0.9V vs. RHE. Each state is named as  $n\text{O} + m\text{Pt}$ , where  $n$  and  $m$  represent the number of O and Pt atoms that are added in the unit cell at the current GCMC step. The atoms above the surface plane are depicted in the ball-and-stick style, while other atoms are depicted in the CPK style. Colors in figure: Blue balls are Pt; Violet balls are Ni; Cyan balls are Mo; Red balls are O.

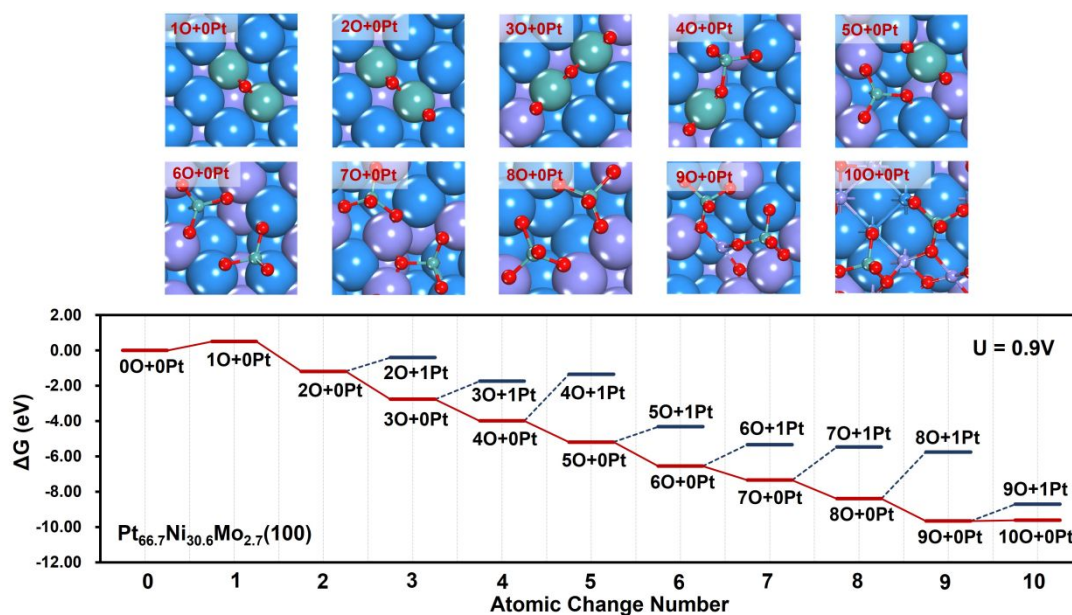

**Figure S14.** Structures and energetic profiles for the intermediate states and the evolution of  $\text{Pt}_{66.7}\text{Ni}_{30.6}\text{Mo}_{2.7}(100)$  at 0.9V vs. RHE. Each state is named as  $n\text{O} + m\text{Pt}$ , where  $n$  and  $m$  represent the number of O and Pt atoms that are added in the unit cell at the current GCMC step. The atoms above the surface plane are depicted in the ball-and-stick style, while other atoms are depicted in the CPK style. Colors in figure: Blue balls are Pt; Violet balls are Ni; Cyan balls are Mo; Red balls are O.

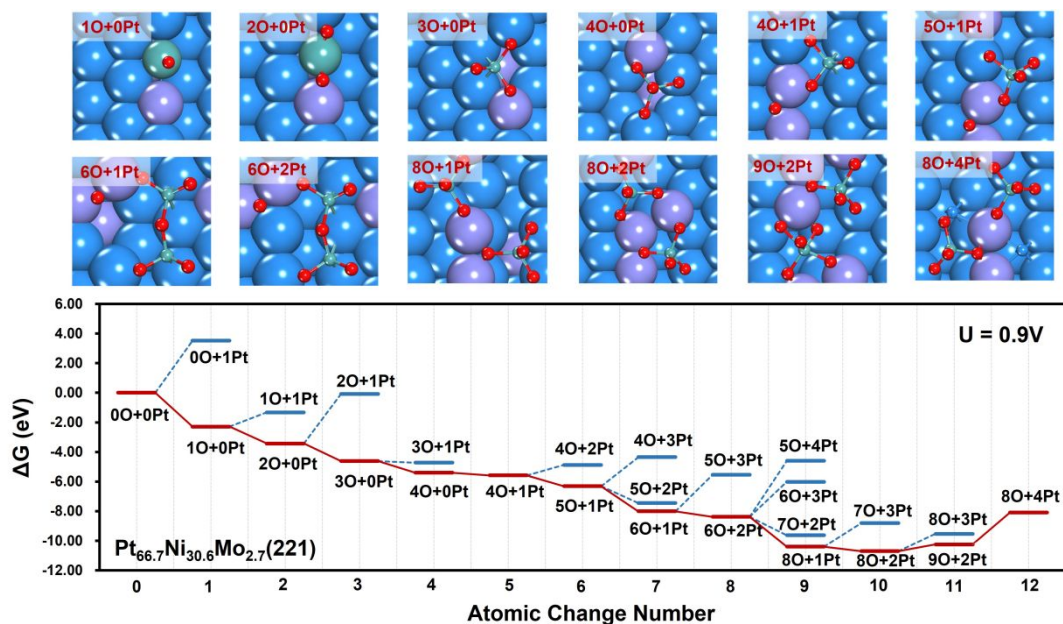

**Figure S15.** Structures and energetic profiles for the intermediate states and the evolution of Pt<sub>66.7</sub>Ni<sub>30.6</sub>Mo<sub>2.7</sub> (221) at 0.9V vs. RHE. Each state is named as nO + mPt, where n and m represent the number of O and Pt atoms that are added in the unit cell at the current GCMC step. The atoms above the surface plane are depicted in the ball-and-stick style, while other atoms are depicted in the CPK style. Colors in figure: Blue balls are Pt; Violet balls are Ni; Cyan balls are Mo; Red balls are O.

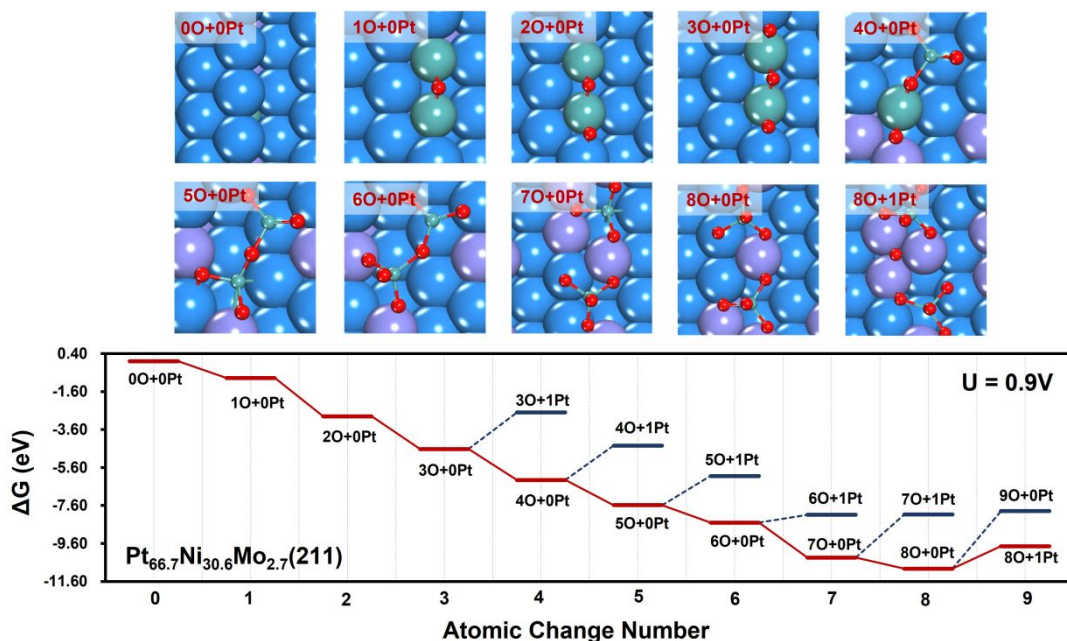

**Figure S16.** Structures and energetic profiles for the intermediate states and the evolution of Pt<sub>66.7</sub>Ni<sub>30.6</sub>Mo<sub>2.7</sub> (211) at 0.9V vs. RHE. Each state is named as nO + mPt, where n and m represent the number of O and Pt atoms that are added in the unit cell at the current GCMC step. The atoms above the surface plane are depicted in the ball-and-stick style, while other atoms are depicted in the CPK style. Colors in figure: Blue balls are Pt; Violet balls are Ni; Cyan balls are Mo; Red balls are O.

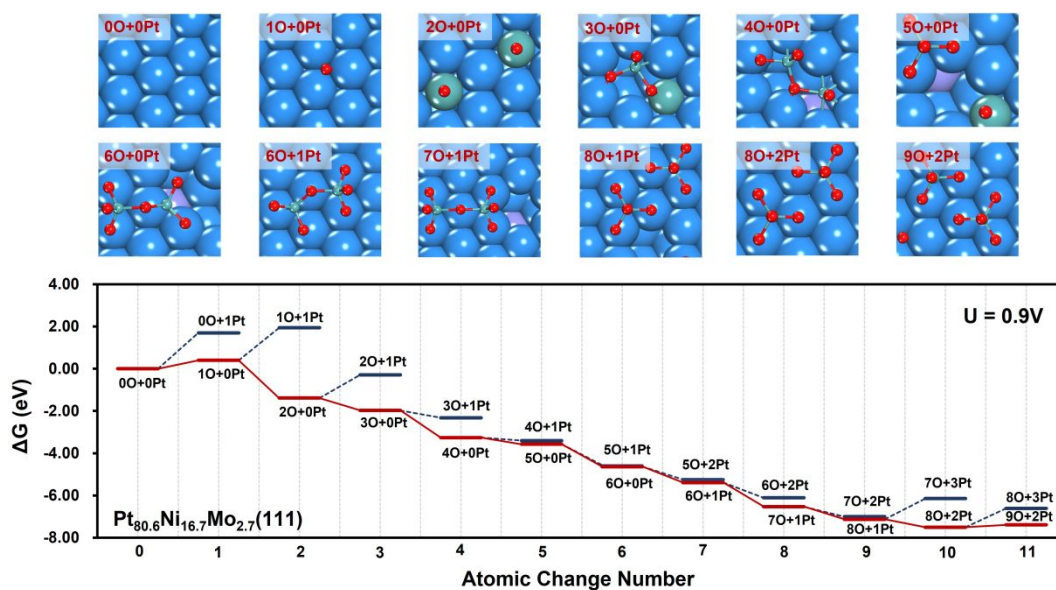

**Figure S17.** Structures and energetic profiles for the intermediate states and the evolution of  $\text{Pt}_{80.6}\text{Ni}_{16.7}\text{Mo}_{2.7}(111)$  at 0.9V vs. RHE. Each state is named as  $n\text{O} + m\text{Pt}$ , where  $n$  and  $m$  represent the number of O and Pt atoms that are added in the unit cell at the current GCMC step. The atoms above the surface plane are depicted in the ball-and-stick style, while other atoms are depicted in the CPK style. Colors in figure: Blue balls are Pt; Violet balls are Ni; Cyan balls are Mo; Red balls are O.

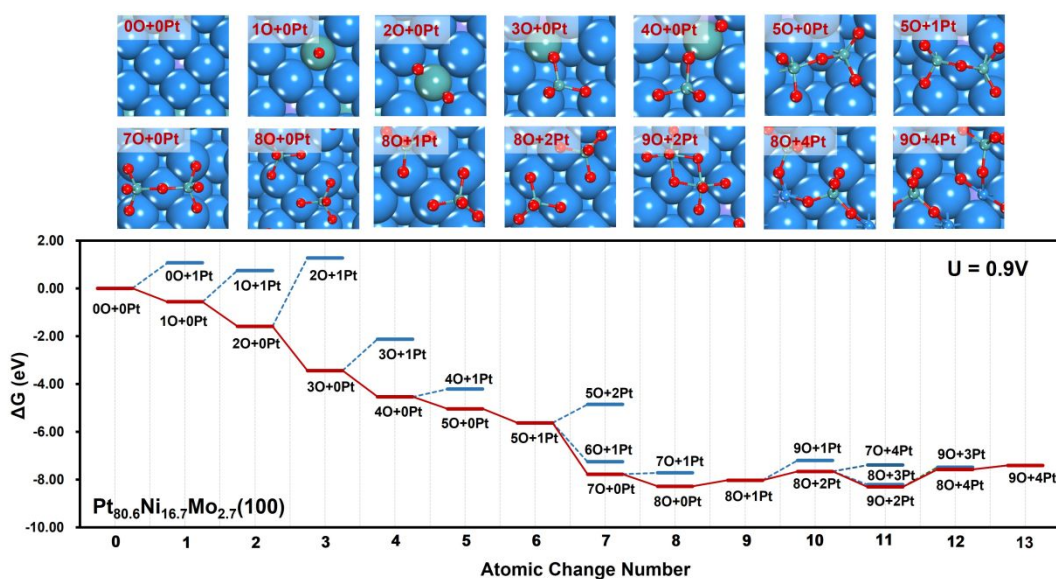

**Figure S18.** Structures and energetic profiles for the intermediate states and the evolution of  $\text{Pt}_{80.6}\text{Ni}_{16.7}\text{Mo}_{2.7}(100)$  at 0.9V vs. RHE. Each state is named as  $n\text{O} + m\text{Pt}$ , where  $n$  and  $m$  represent the number of O and Pt atoms that are added in the unit cell at the current GCMC step. The atoms above the surface plane are depicted in the ball-and-stick style, while other atoms are depicted in the CPK style. Colors in figure: Blue balls are Pt; Violet balls are Ni; Cyan balls are Mo; Red balls are O.



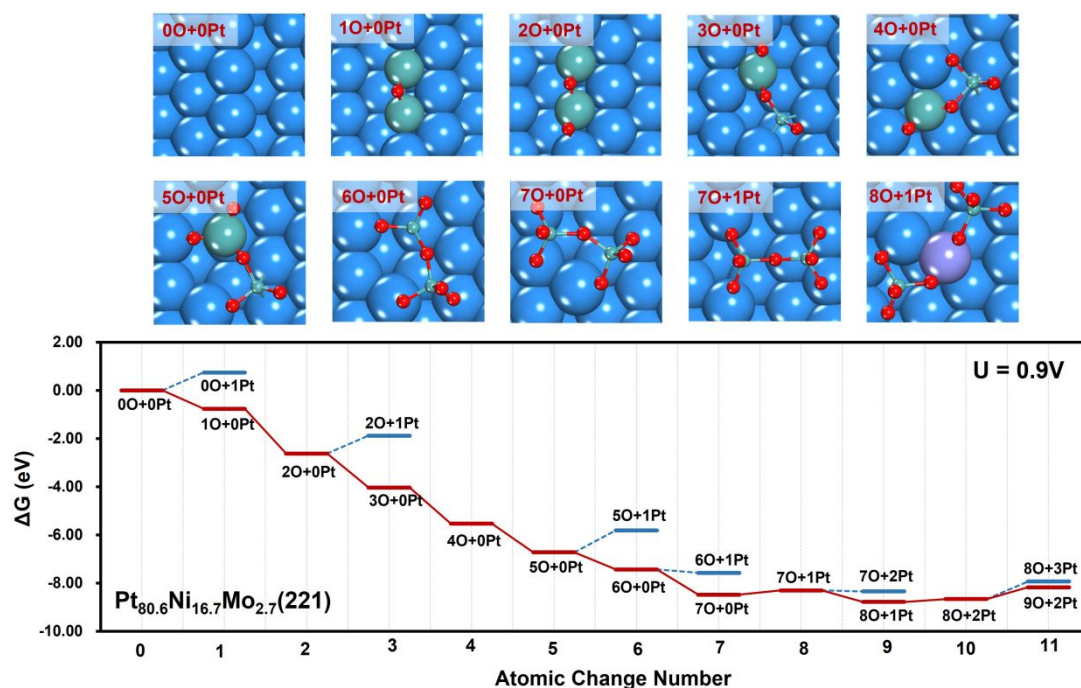

**Figure S19.** Structures and energetic profiles for the intermediate states and the evolution of  $\text{Pt}_{80.6}\text{Ni}_{16.7}\text{Mo}_{2.7}$  (221) at 0.9V vs. RHE. Each state is named as  $n\text{O} + m\text{Pt}$ , where  $n$  and  $m$  represent the number of O and Pt atoms that are added in the unit cell at the current GCMC step. The atoms above the surface plane are depicted in the ball-and-stick style, while other atoms are depicted in the CPK style. Colors in figure: Blue balls are Pt; Violet balls are Ni; Cyan balls are Mo; Red balls are O.

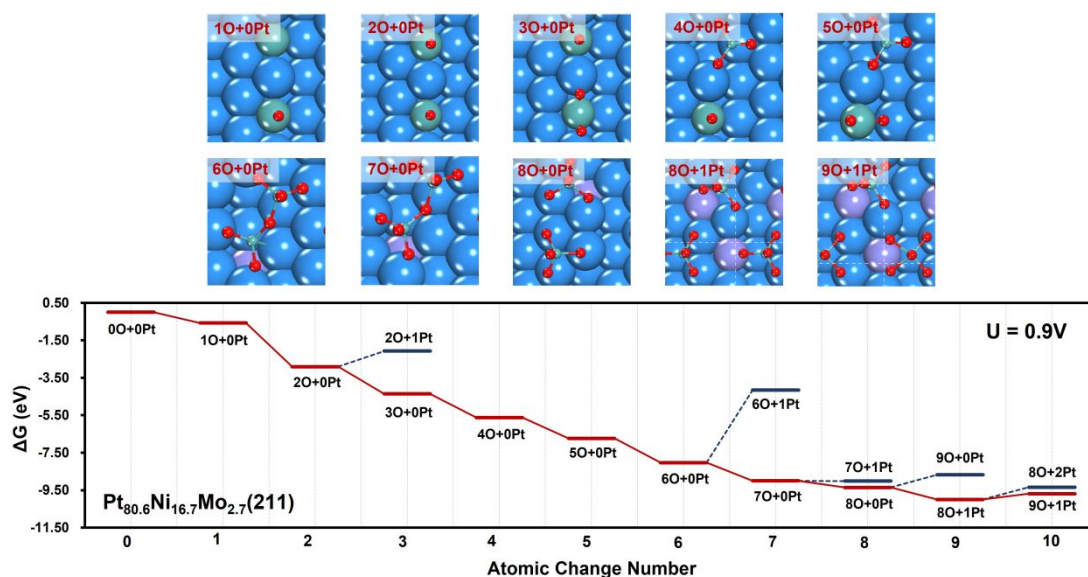

**Figure S20.** Structures and energetic profiles for the intermediate states and the evolution of  $\text{Pt}_{80.6}\text{Ni}_{16.7}\text{Mo}_{2.7}$  (211) at 0.9V vs. RHE. Each state is named as  $n\text{O} + m\text{Pt}$ , where  $n$  and  $m$  represent the number of O and Pt atoms that are added in the unit cell at the current GCMC step. The atoms above the surface plane are depicted in the ball-and-stick style, while other atoms are depicted in the CPK style. Colors in figure: Blue balls are Pt; Violet balls are Ni; Cyan balls are Mo; Red balls are O.

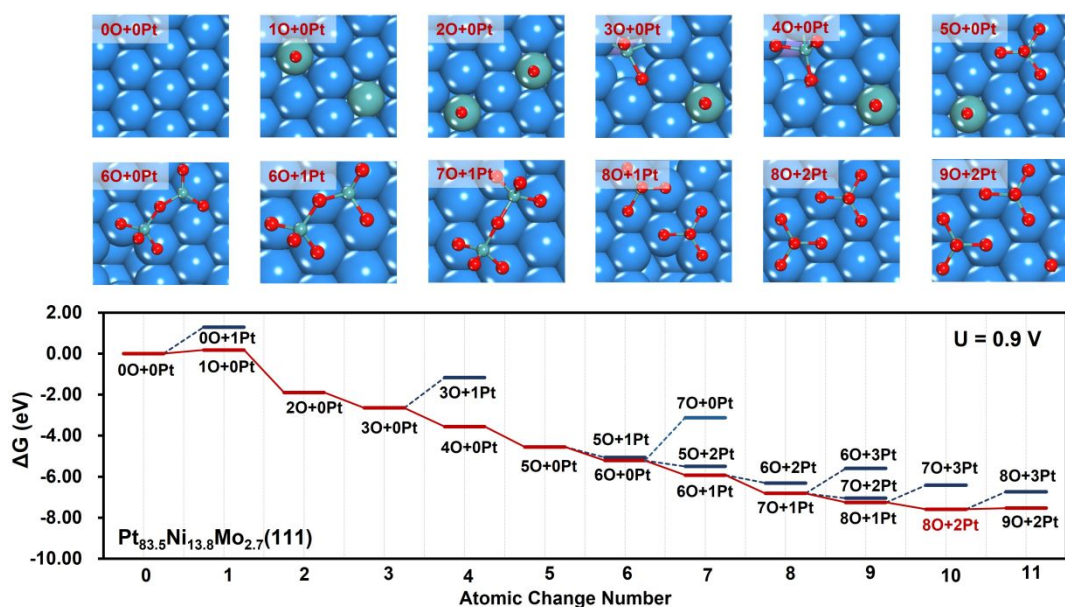

**Figure S21.** Structures and energetic profiles for the intermediate states and the evolution of Pt<sub>83.5</sub>Ni<sub>13.8</sub>Mo<sub>2.7</sub>(111) at 0.9V vs. RHE. Each state is named as nO + mPt, where n and m represent the number of O and Pt atoms that are added in the unit cell at the current GCMC step. The atoms above the surface plane are depicted in the ball-and-stick style, while other atoms are depicted in the CPK style. Colors in figure: Blue balls are Pt; Violet balls are Ni; Cyan balls are Mo; Red balls are O.

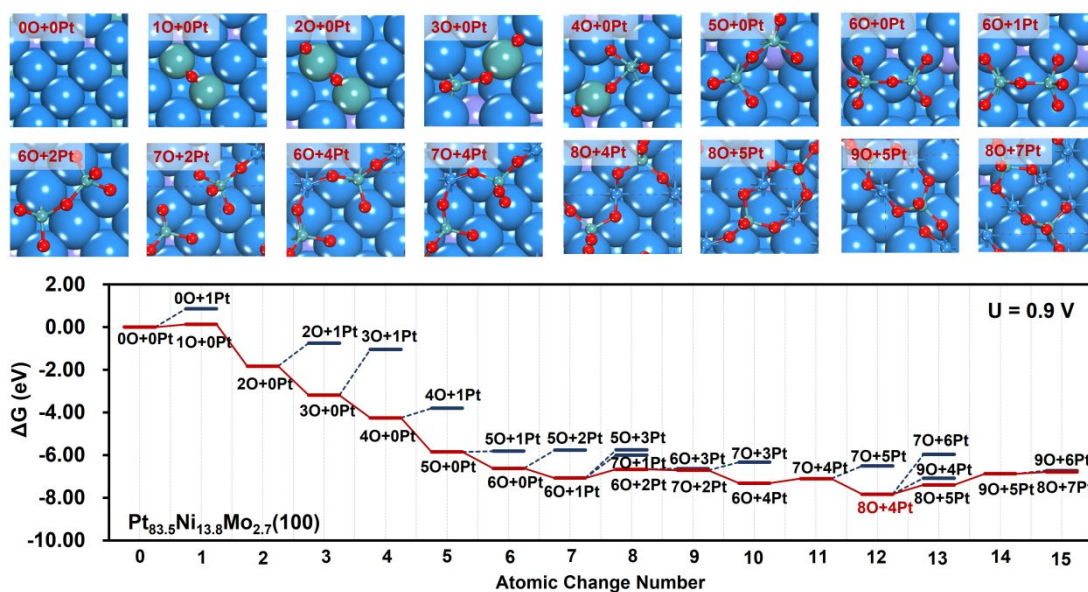

**Figure S22.** Structures and energetic profiles for the intermediate states and the evolution of Pt<sub>83.5</sub>Ni<sub>13.8</sub>Mo<sub>2.7</sub>(100) at 0.9V vs. RHE. Each state is named as nO + mPt, where n and m represent the number of O and Pt atoms that are added in the unit cell at the current GCMC step. The atoms above the surface plane are depicted in the ball-and-stick style, while other atoms are depicted in the CPK style. Colors in figure: Blue balls are Pt; Violet balls are Ni; Cyan balls are Mo; Red balls are O.

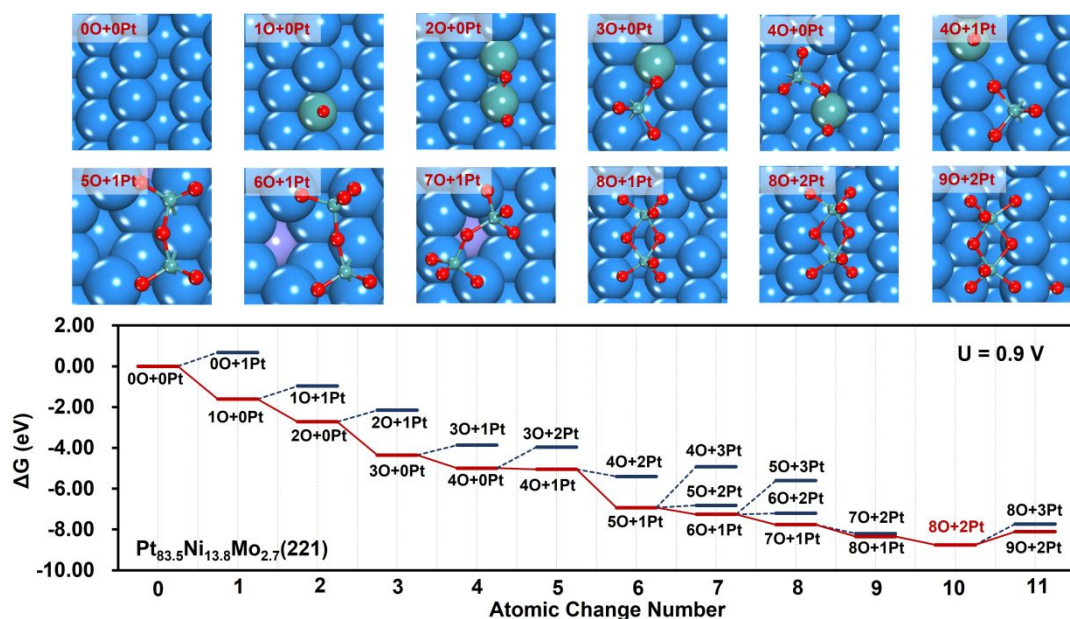

**Figure S23.** Structures and energetic profiles for the intermediate states and the evolution of  $\text{Pt}_{83.5}\text{Ni}_{13.8}\text{Mo}_{2.7}$  (221) at 0.9V vs. RHE. Each state is named as  $n\text{O} + m\text{Pt}$ , where  $n$  and  $m$  represent the number of O and Pt atoms that are added in the unit cell at the current GCMC step. The atoms above the surface plane are depicted in the ball-and-stick style, while other atoms are depicted in the CPK style. Colors in figure: Blue balls are Pt; Violet balls are Ni; Cyan balls are Mo; Red balls are O.

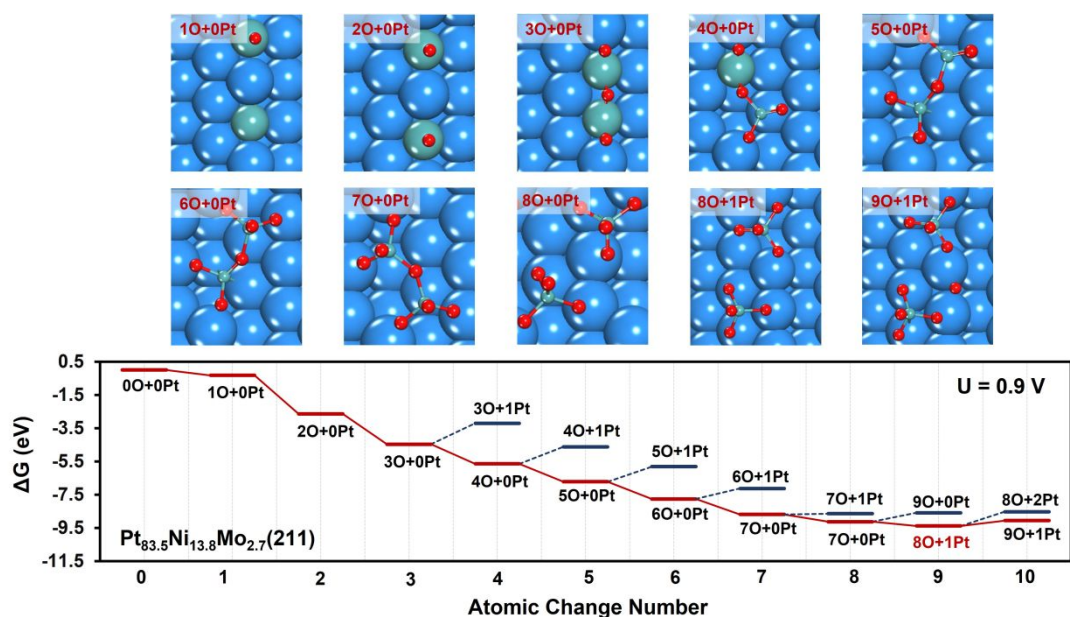

**Figure S24.** Structures and energetic profiles for the intermediate states and the evolution of  $\text{Pt}_{83.5}\text{Ni}_{13.8}\text{Mo}_{2.7}$  (211) at 0.9V vs. RHE. Each state is named as  $n\text{O} + m\text{Pt}$ , where  $n$  and  $m$  represent the number of O and Pt atoms that are added in the unit cell at the current GCMC step. The atoms above the surface plane are depicted in the ball-and-stick style, while other atoms are depicted in the CPK style. Colors in figure: Blue balls are Pt; Violet balls are Ni; Cyan balls are Mo; Red balls are O.

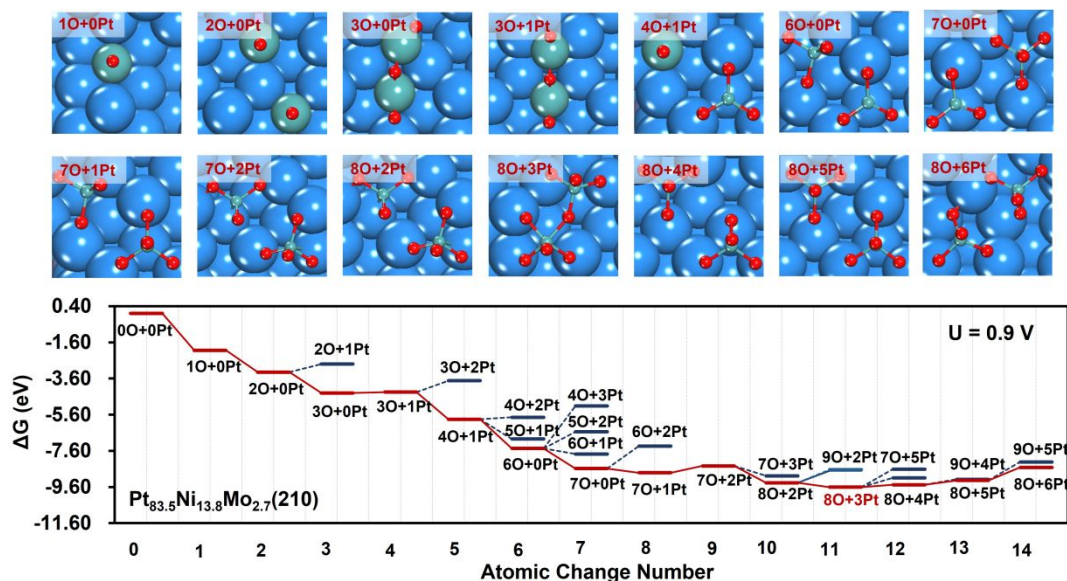

**Figure S25.** Structures and energetic profiles for the intermediate states and the evolution of Pt<sub>83.5</sub>Ni<sub>13.8</sub>Mo<sub>2.7</sub> (210) at 0.9V vs. RHE. Each state is named as nO + mPt, where n and m represent the number of O and Pt atoms that are added in the unit cell at the current GCMC step. The atoms above the surface plane are depicted in the ball-and-stick style, while other atoms are depicted in the CPK style. Colors in figure: Blue balls are Pt; Violet balls are Ni; Cyan balls are Mo; Red balls are O.

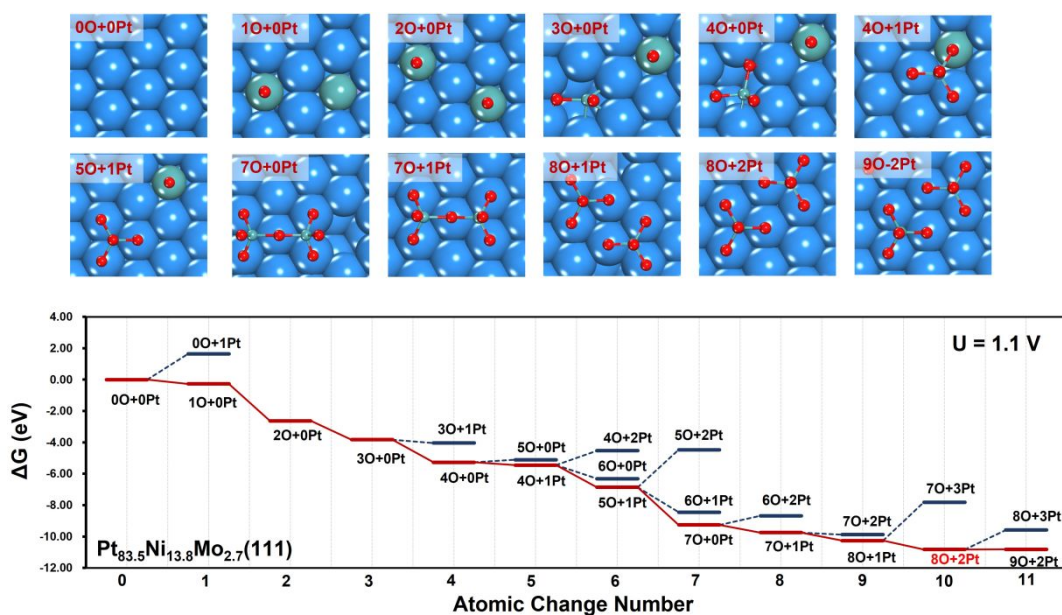

**Figure S26.** Structures and energetic profiles for the intermediate states and the evolution of Pt<sub>83.5</sub>Ni<sub>13.8</sub>Mo<sub>2.7</sub> (111) at 1.1V vs. RHE. Each state is named as nO + mPt, where n and m represent the number of O and Pt atoms that are added in the unit cell at the current GCMC step. The atoms above the surface plane are depicted in the ball-and-stick style, while other atoms are depicted in the CPK style. Colors in figure: Blue balls are Pt; Violet balls are Ni; Cyan balls are Mo; Red balls are O.

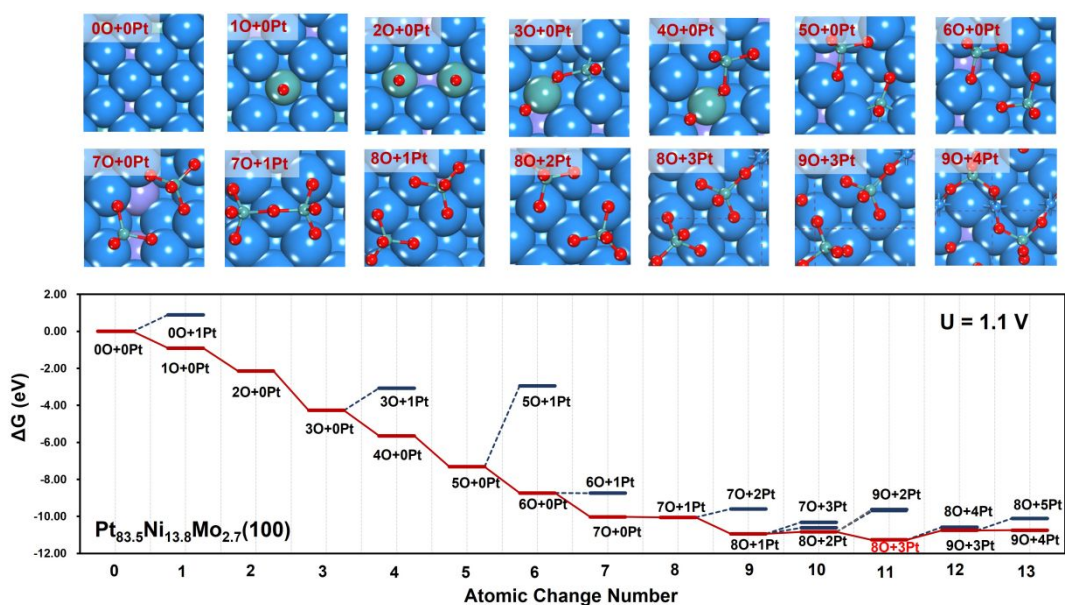

**Figure S27.** Structures and energetic profiles for the intermediate states and the evolution of Pt<sub>83.5</sub>Ni<sub>13.8</sub>Mo<sub>2.7</sub>(100) at 1.1V vs. RHE. Each state is named as nO + mPt, where n and m represent the number of O and Pt atoms that are added in the unit cell at the current GCMC step. The atoms above the surface plane are depicted in the ball-and-stick style, while other atoms are depicted in the CPK style. Colors in figure: Blue balls are Pt; Violet balls are Ni; Cyan balls are Mo; Red balls are O.

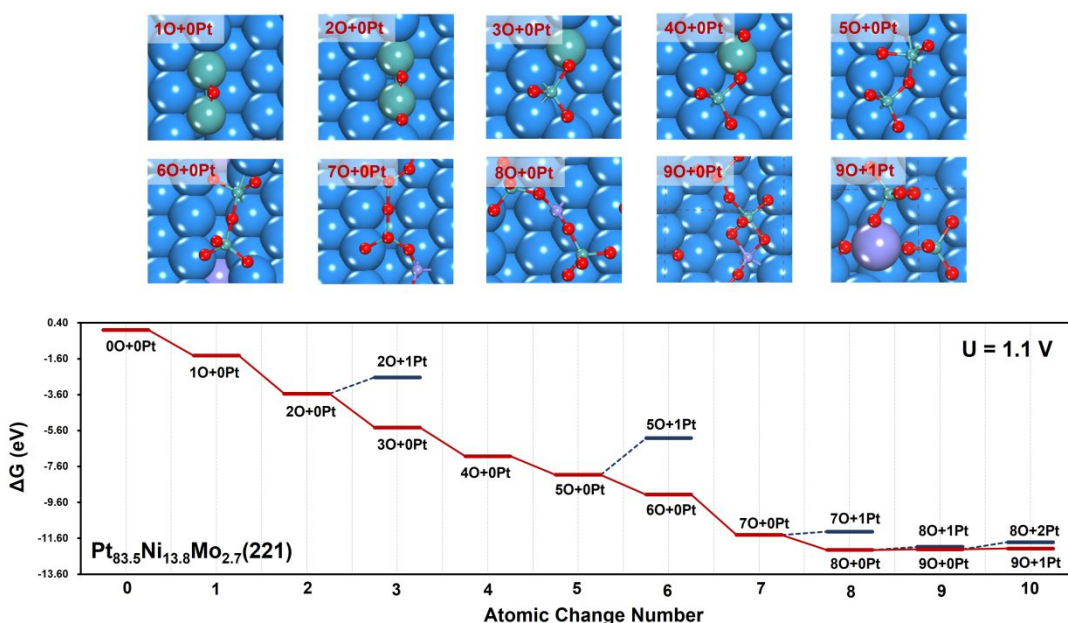

**Figure S28.** Structures and energetic profiles for the intermediate states and the evolution of Pt<sub>83.5</sub>Ni<sub>13.8</sub>Mo<sub>2.7</sub>(221) at 1.1V vs. RHE. Each state is named as nO + mPt, where n and m represent the number of O and Pt atoms that are added in the unit cell at the current GCMC step. The atoms above the surface plane are depicted in the ball-and-stick style, while other atoms are depicted in the CPK style. Colors in figure: Blue balls are Pt; Violet balls are Ni; Cyan balls are Mo; Red balls are O.

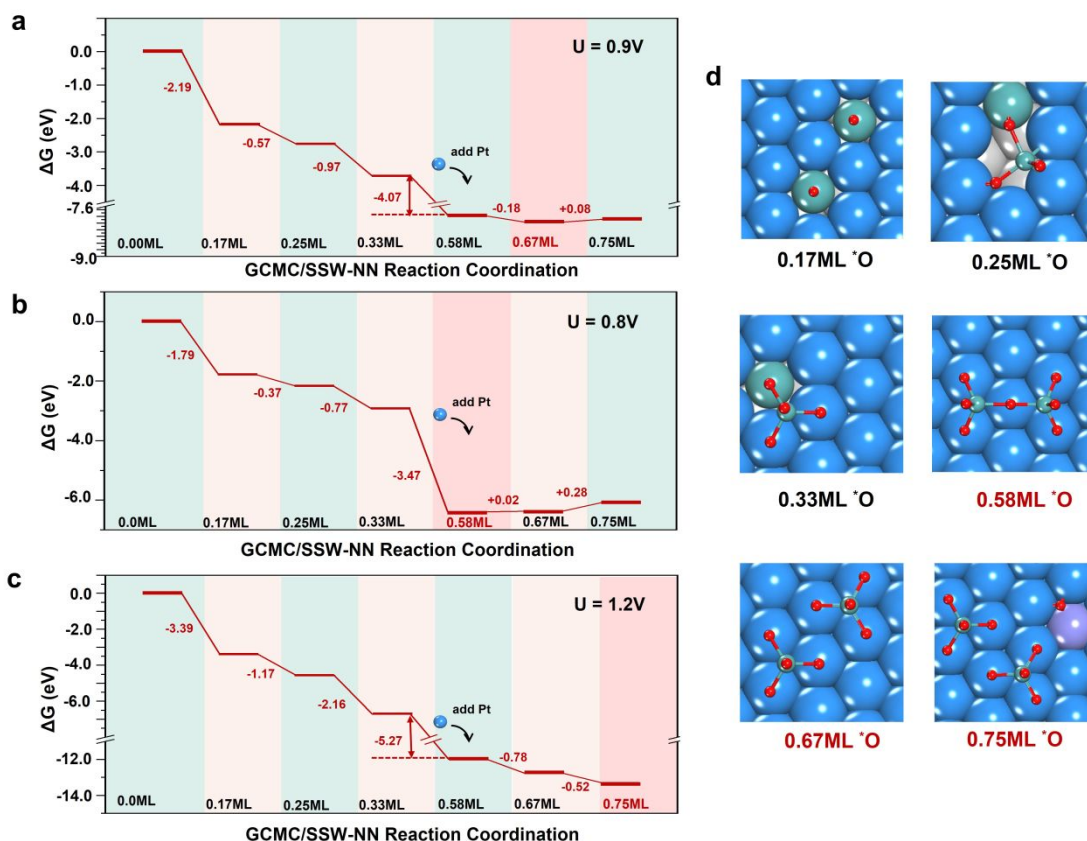

**Figure S29.** Energy profiles for the GCMC/SSW-NN trajectories of  $\text{Pt}_{75.0}\text{Ni}_{22.3}\text{Mo}_{2.7}(111)$  at 0.8, 0.9, and 1.2V vs RHE. Colors in the right column: blue balls are Pt; violet balls are Ni; cyan balls are Mo; red balls are O.

#### 4. ORR Activity on $\text{Pt}_{75.0}\text{Ni}_{22.3}\text{Mo}_{2.7}(111)$ , $\text{Pt}_{83.5}\text{Ni}_{13.8}\text{Mo}_{2.7}(111)$ , and $\text{Pt}_{75.0}\text{Ni}_{25.0}(111)$ -0.16 ML O

As the electrode potential increases, the  $^*\text{O}$  adatom would gradually appear on the clean electrode surface. We calculate the  $^*\text{O}$  coverage for  $\text{Pt}_{75.0}\text{Ni}_{22.3}\text{Mo}_{2.7}(111)$  and  $\text{Pt}_{75.0}\text{Ni}_{25.0}(111)$ , as shown in Figure S31. Note that we did not perform SSW global optimization in this calculation, so the surface would not reconstruct during simulation. At 0 ~ 0.8 V, both surfaces are clean. At 0.8 ~ 0.9 V,  $\text{Pt}_{75.0}\text{Ni}_{25.0}(111)$  surface starts to be covered by 0.08 ML  $^*\text{O}$ , while at 0.9 V, the  $^*\text{O}$  coverage increases to 0.16 ML. For  $\text{Pt}_{75.0}\text{Ni}_{22.3}\text{Mo}_{2.7}(111)$ , it starts to be covered by 0.08 ML  $^*\text{O}$  at 0.83 V, while at 0.94 V, the  $^*\text{O}$  coverage increases to 0.16 ML. So, at 0.9 V, the  $^*\text{O}$  coverage on the clean  $\text{Pt}_{75.0}\text{Ni}_{25.0}(111)$  surface can reach up to 0.16 ML before surface reconstruction.

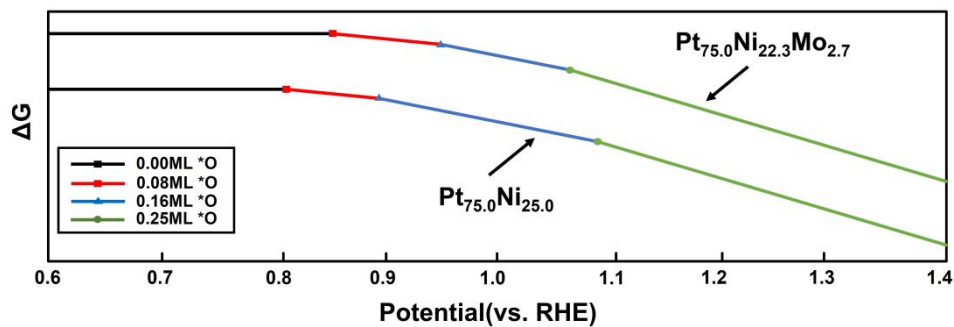

**Figure S30.** A surface phase diagram of  $\text{Pt}_{75.0}\text{Ni}_{25.0}$  (111) and  $\text{Pt}_{75.0}\text{Ni}_{22.3}\text{Mo}_{2.7}$ (111). To illustrate curve clearly, a constant spacing in the y-axis is applied for the  $\Delta G$  of the clean surfaces for  $\text{Pt}_{75.0}\text{Ni}_{25.0}$  (111).

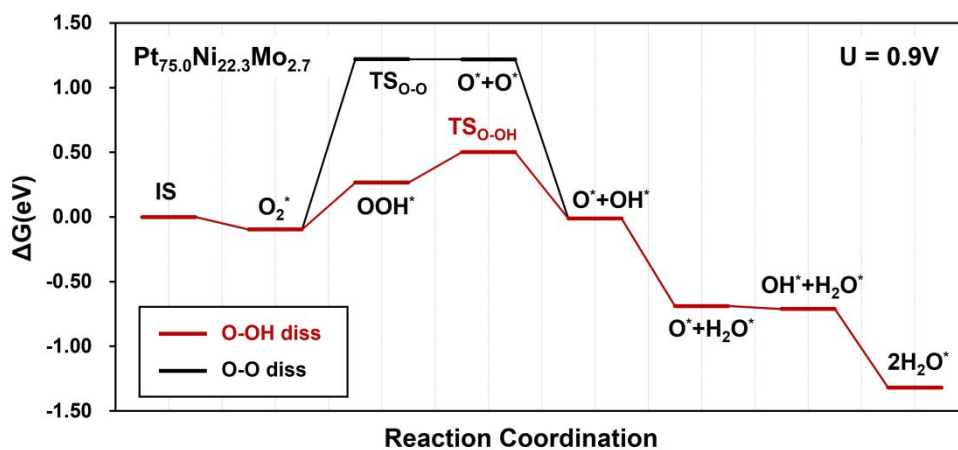

**Figure S31.** Free energy profile for ORR on in-situ  $\text{Pt}_{75.0}\text{Ni}_{22.3}\text{Mo}_{2.7}$ (111) at 0.9V.

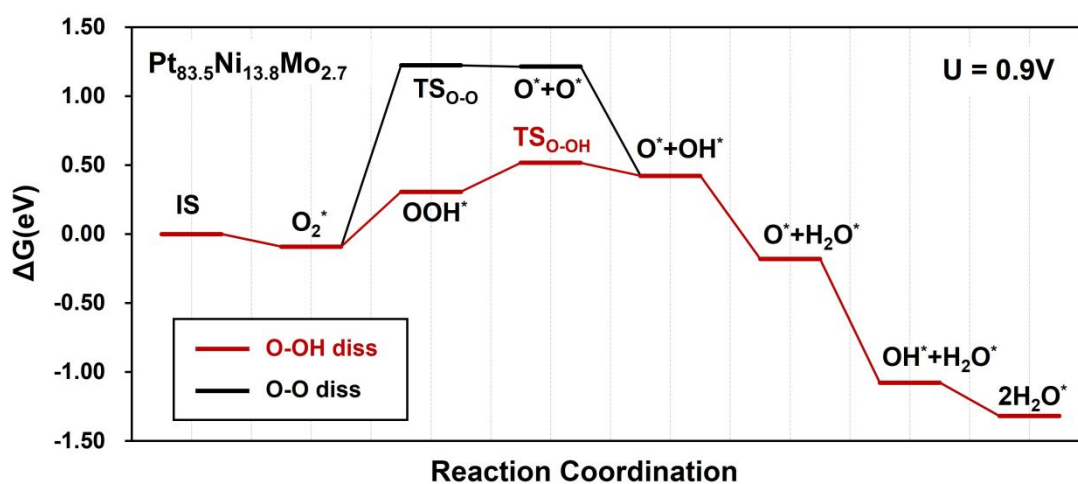

**Figure S32.** Free energy profile for ORR on the in-situ  $\text{Pt}_{83.5}\text{Ni}_{13.8}\text{Mo}_{2.7}$ (111) at 0.9V.

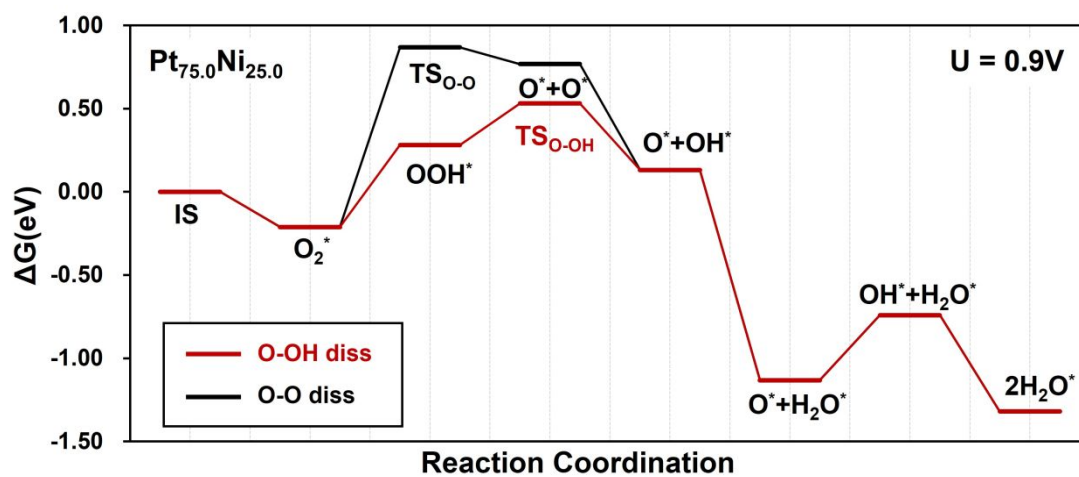

**Figure S33.** Free energy profile for ORR on the  $\text{Pt}_{75.0}\text{Ni}_{25.0}(111)$ -0.16 ML O surface at 0.9V.



## 5. Dissolution Free Energy of \*MO<sub>4</sub>

As we have shown in the main text, the dissolution free energy  $\Delta G_{\text{diss}}$  is defined as the

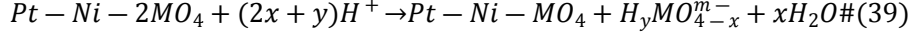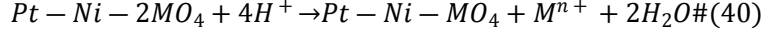

In Eq.46-47, the \*MO<sub>4</sub> group can left from the surface by forms of MO<sub>4</sub><sup>n-</sup>(VO<sup>2+</sup>, MnO<sub>4</sub><sup>-</sup>, TcO<sub>4</sub><sup>-</sup>), H<sub>n</sub>MO<sub>4</sub> (H<sub>2</sub>MoO<sub>4</sub>, HCrO<sub>4</sub><sup>-</sup>) or M<sup>n+</sup>( Cr<sup>3+</sup>, Fe<sup>3+</sup>, Nb<sup>3+</sup>, Ta<sup>3+</sup>, W<sup>3+</sup>, Ru<sup>2+</sup>, Os<sup>2+</sup>, Re<sup>3+</sup>). If a metal has multiple ionic forms (e.g., Mn<sup>2+</sup>, Mn<sup>3+</sup>, HMnO<sub>4</sub><sup>-</sup>, MnO<sub>4</sub><sup>2-</sup>). We give detailed examples of each ion forms.

### MO<sub>4</sub><sup>n-</sup>

We take MnO<sub>4</sub><sup>2-</sup> as the example,

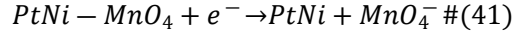

$$\begin{aligned} \Delta G &= G(PtNi) + \mu_{MnO_4^-} - G(PtNi - MnO_4) - \mu_{e^-} \# \\ &= G(PtNi) + \mu_{MnO_4^-}^0 + k_B T \ln(c/c^0) - G(PtNi - MnO_4) - \mu_{e^-} \end{aligned} \#(42)$$

where the concentration of ions set as  $c = 10^{-4}$  mol/L.

According to the definition of electrode potential, the free energy change of Eq. 43 is 0 when at the electrode potential of  $E_{MnO_4^-/Mn}^0$ . Then, we can get that

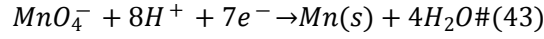

$$\Delta G = \mu_{Mn}^0 + 4\mu_{H_2O} - 8\mu_{H^+} - 7\mu_{e_{MnO_4^-/Mn}^-} - \mu_{MnO_4^-}^0 = 0 \#(44)$$

where  $\mu_{Mn}^0$  is the energy of bulk Mn.

$$\begin{aligned} \mu_{MnO_4^-}^0 &= \mu_{Mn}^0 + 4\mu_{H_2O} - 8\mu_{H^+} - 7\mu_{e_{MnO_4^-/Mn}^-} \# \\ &= \mu_{Mn}^0 + 4\mu_{H_2O} - 8\mu_{H^+} + 7\mu_{e^-}^{SHE} - 7\mu_{e_{MnO_4^-/Mn}^-} - 7\mu_{e^-}^{SHE} \#(45) \\ &= \mu_{Mn}^0 + 4\mu_{H_2O} - 8\mu_{H^+} + 7eE_{MnO_4^-/Mn}^0 - 7\mu_{e^-}^{SHE} \end{aligned}$$

Substituting Eq. 45 into Eq. 42, we get

$$\begin{aligned} \Delta G &= G(PtNi) + \mu_{MnO_4^-}^0 + k_B T \ln(c/c^0) - G(PtNi - MnO_4) - \mu_{e^-} \# \\ &= G(PtNi) + \mu_{Mn}^0 + 4\mu_{H_2O} - 8\mu_{H^+} + 7eE_{MnO_4^-/Mn}^0 - 7\mu_{e^-}^{SHE} \\ &\quad + k_B T \ln(c/c^0) - G(PtNi - MnO_4) - \mu_{e^-} \# \\ &= G(PtNi) - G(PtNi - MnO_4) + \mu_{Mn}^0 + 4\mu_{H_2O} + 7eE_{MnO_4^-/Mn}^0 + k_B T \ln(c/c^0) \\ &\quad - 8\mu_{H^+} - 7\mu_{e^-}^{SHE} - \mu_{e^-} \# \\ &= G(PtNi) - G(PtNi - MnO_4) + \mu_{Mn}^0 + 4\mu_{H_2O} + 7eE_{MnO_4^-/Mn}^0 + k_B T \ln(c/c^0) \\ &\quad - 8(\mu_{H^+} + \mu_{e^-}) + 7\mu_{e^-} - 7\mu_{e^-}^{SHE} \# \\ &= G(PtNi) - G(PtNi - MnO_4) + \mu_{Mn}^0 + 4\mu_{H_2O} + 7eE_{MnO_4^-/Mn}^0 + k_B T \ln(c/c^0) \#(46) \\ &\quad - 8\left(\frac{1}{2}\mu_{H_2} - \mu_{e^-}^{SHE} + \mu_{e^-}\right) - 7(\mu_{e^-}^{SHE} - \mu_{e^-}) \\ &= G(PtNi) - G(PtNi - MnO_4) + \mu_{Mn}^0 + 4\mu_{H_2O} + 7eE_{MnO_4^-/Mn}^0 + k_B T \ln(c/c^0) \\ &\quad - 4\mu_{H_2} + 8eU - 7eU \\ &= G(PtNi) - G(PtNi - MnO_4) + \mu_{Mn}^0 + 4\mu_{H_2O} + 7eE_{MnO_4^-/Mn}^0 + k_B T \ln(c/c^0) \\ &\quad - 4\mu_{H_2} + eU \end{aligned}$$

And the contribution of c can be further corrected by a term of  $0.059 \lg(c)$ . Thus, the  $\Delta G_{\text{diss}}$  can be summarized as Eq. 47

$$\begin{aligned} \Delta G_{\text{diss}} &= G(PtNi) - G(PtNi - MnO_4) + \mu_{Mn}^0 + 4\mu_{H_2O} + 7eE_{MnO_4^-/Mn}^0 + 0.059 \times \lg(1 \times 10^{-4}) \\ &\quad - 4\mu_{H_2} + eU = -0.90 \text{ eV} \quad (47) \end{aligned}$$

## $H_nMO_4$

We take  $H_2MoO_4$  as the example,

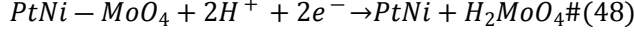

$$\begin{aligned} \Delta G &= G(PtNi) + \mu_{H_2MoO_4} - G(PtNi - MoO_4) - 2\mu_{H^+} - 2\mu_{e^-} \# \\ &= G(PtNi) + \mu_{H_2MoO_4}^0 + k_B T \ln(c/c^0) - G(PtNi - MoO_4) - 2\mu_{H^+} - 2\mu_{e^-} \#(49) \end{aligned}$$

where the concentration of ions set as  $c = 10^{-4}$  mol/L.

According to the definition of electrode potential, the free energy change of Eq. 50 is 0 when at the electrode potential of  $E_{H_2MoO_4/Mo}^0$ . Then, we can get that

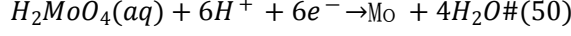

$$\Delta G = \mu_{Mo}^0 + 4\mu_{H_2O} - 6\mu_{H^+} - 6\mu_{e_{\bar{H}_2MoO_4/Mo}} - \mu_{H_2MoO_4}^0 = 0 \#(51)$$

where  $\mu_{Mo}^0$  is the energy of bulk Mo.

$$\begin{aligned} \mu_{H_2MoO_4}^0 &= \mu_{Mo}^0 + 4\mu_{H_2O} - 6\mu_{H^+} - 6\mu_{e_{\bar{H}_2MoO_4/Mo}} \# \\ &= \mu_{Mo}^0 + 4\mu_{H_2O} - 6\mu_{H^+} + (6\mu_e^{SHE} - 6\mu_{e_{\bar{H}_2MoO_4/Mo}}) - 6\mu_e^{SHE} \#(52) \\ &= \mu_{Mo}^0 + 4\mu_{H_2O} - 6\mu_{H^+} + 6eE_{H_2MoO_4/Mo}^0 - 6\mu_e^{SHE} \end{aligned}$$

Substituting Eq. 52 into Eq. 49, we get

$$\begin{aligned} \Delta G &= G(PtNi) + \mu_{H_2MoO_4}^0 + k_B T \ln(c/c^0) - G(PtNi - MoO_4) - 2\mu_{H^+} - 2\mu_{e^-} \# \\ &= G(PtNi) - G(PtNi - MoO_4) \\ &+ \mu_{Mo}^0 + 4\mu_{H_2O} - 6\mu_{H^+} + 6eE_{H_2MoO_4/Mo}^0 - 6\mu_e^{SHE} + k_B T \ln(c/c^0) - 2\mu_{H^+} - 2\mu_{e^-} \\ &= G(PtNi) - G(PtNi - MoO_4) + \mu_{Mo}^0 + 4\mu_{H_2O} + 6eE_{H_2MoO_4/Mo}^0 + k_B T \ln(c/c^0) \\ &\quad - 8\mu_{H^+} - 6\mu_e^{SHE} - 2\mu_{e^-} \\ &= G(PtNi) - G(PtNi - MoO_4) + \mu_{Mo}^0 + 4\mu_{H_2O} + 6eE_{H_2MoO_4/Mo}^0 + k_B T \ln(c/c^0) \\ &\quad - 8(\mu_{H^+} + \mu_{e^-}) - 6\mu_e^{SHE} + 6\mu_{e^-} \\ &= G(PtNi) - G(PtNi - MoO_4) + \mu_{Mo}^0 + 4\mu_{H_2O} + 6eE_{H_2MoO_4/Mo}^0 + k_B T \ln(c/c^0) \#(53) \\ &\quad - 8\left(\frac{1}{2}\mu_{H_2} - \mu_e^{SHE} + \mu_{e^-}\right) - 6(\mu_e^{SHE} - \mu_{e^-}) \\ &= G(PtNi) - G(PtNi - MoO_4) + \mu_{Mo}^0 + 4\mu_{H_2O} + 6eE_{H_2MoO_4/Mo}^0 + k_B T \ln(c/c^0) \\ &\quad - 4\mu_{H_2} + 8eU - 6eU \\ &= G(PtNi) - G(PtNi - MoO_4) + \mu_{Mo}^0 + 4\mu_{H_2O} + 6eE_{H_2MoO_4/Mo}^0 + k_B T \ln(c/c^0) \\ &\quad - 4\mu_{H_2} + 2eU \end{aligned}$$

And the contribution of  $c$  can be further corrected by a term of  $0.059 \lg(c)$ . Thus, the  $\Delta G_{diss}$  can be summarized as Eq. 54

$$\begin{aligned} \Delta G_{diss} &= G(PtNi) - G(PtNi - MoO_4) + \mu_{Mo}^0 + 4\mu_{H_2O} + 6eE_{H_2MoO_4/Mo}^0 + 0.059 \times \lg(1 \times 10^{-4}) \\ &- 4\mu_{H_2} + 2eU = 0.16 \text{ eV} \quad (54) \end{aligned}$$

## $M^{n+}$

We take  $Cr^{3+}$  as the example,

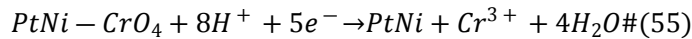

$$\begin{aligned} \Delta G &= G(PtNi) + \mu_{Cr^{3+}} + 4\mu_{H_2O} - G(PtNi - CrO_4) - 8\mu_{H^+} - 5\mu_{e^-} \# \\ &= G(PtNi) + \mu_{Cr^{3+}}^0 + k_B T \ln(c/c^0) + 4\mu_{H_2O} - G(PtNi - CrO_4) - 8\mu_{H^+} - 5\mu_{e^-} \#(56) \end{aligned}$$

where the concentration of ions set as  $c = 10^{-4}$  mol/L.

To calculate  $\mu_{Cr^{3+}}^0$ , we use the standard half-electrode potential  $E_{Cr^{3+}/Cr}^0$

According to the definition of electrode potential, the free energy change of Eq. 57 is 0 when at the

electrode potential of  $E_{Cr^{3+}/Cr}^0$ . Then, we can get that

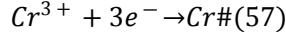

$$\Delta G = \mu_{Cr}^0 - \mu_{Cr^{3+}}^0 - 3\mu_{e_{Cr^{3+}/Cr}} = 0 \# (58)$$

$$\begin{aligned} \mu_{Cr^{3+}}^0 &= \mu_{Cr}^0 - 3\mu_{e_{Cr^{3+}/Cr}} = \mu_{Cr}^0 - 3\mu_{e_{Cr^{3+}/Cr}} = \mu_{Cr}^0 + 3\mu_e^{SHE} - 3\mu_{e_{Cr^{3+}/Cr}} - 3\mu_e^{SHE} \# (59) \\ &= \mu_{Cr}^0 + 3eE_{Cr^{3+}/Cr}^0 - 3\mu_e^{SHE} \end{aligned}$$

where  $\mu_{Cr}^0$  is the energy of bulk Cr.

Substituting Eq. 59 into Eq. 56, we get

$$\begin{aligned} \Delta G &= G(PtNi) + \mu_{Cr^{3+}}^0 + k_B T \ln(c/c^0) + 4\mu_{H_2O} - G(PtNi - CrO_4) - 8\mu_{H^+} - 5\mu_{e^-} \\ &= G(PtNi) + \mu_{Cr}^0 + 3eE_{Cr^{3+}/Cr}^0 - 3\mu_e^{SHE} + k_B T \ln(c/c^0) \\ &\quad + 4\mu_{H_2O} - G(PtNi - CrO_4) - 8\mu_{H^+} - 5\mu_{e^-} \\ &= G(PtNi) - G(PtNi - CrO_4) + 4\mu_{H_2O} \\ &\quad + \mu_{Cr}^0 + 3eE_{Cr^{3+}/Cr}^0 + k_B T \ln(c/c^0) - 3\mu_e^{SHE} - 8(\mu_{H^+} + \mu_{e^-}) + 3\mu_{e^-} \\ &= G(PtNi) - G(PtNi - CrO_4) + 4\mu_{H_2O} \\ &\quad + \mu_{Cr}^0 + 3eE_{Cr^{3+}/Cr}^0 + k_B T \ln(c/c^0) - 8(\mu_{H^+} + \mu_{e^-}) - 3(\mu_e^{SHE} - \mu_{e^-}) \\ &= G(PtNi) - G(PtNi - CrO_4) + 4\mu_{H_2O} \\ &\quad + \mu_{Cr}^0 + 3eE_{Cr^{3+}/Cr}^0 + k_B T \ln(c/c^0) - 8\left(\frac{1}{2}\mu_{H_2} - \mu_e^{SHE} + \mu_{e^-}\right) - 3(\mu_e^{SHE} - \mu_{e^-}) \quad (60) \\ &= G(PtNi) - G(PtNi - CrO_4) + 4\mu_{H_2O} \\ &\quad + \mu_{Cr}^0 + 3eE_{Cr^{3+}/Cr}^0 + k_B T \ln(c/c^0) - 4\mu_{H_2} + 8(\mu_e^{SHE} - \mu_{e^-}) - 3(\mu_e^{SHE} - \mu_{e^-}) \\ &= G(PtNi) - G(PtNi - CrO_4) + 4\mu_{H_2O} \\ &\quad + \mu_{Cr}^0 + 3eE_{Cr^{3+}/Cr}^0 + k_B T \ln(c/c^0) + k_B T \ln(c/c^0) - 4\mu_{H_2} + 5(\mu_e^{SHE} - \mu_{e^-}) \\ &= G(PtNi) - G(PtNi - CrO_4) + 4\mu_{H_2O} \\ &\quad + \mu_{Cr}^0 + 3eE_{Cr^{3+}/Cr}^0 + k_B T \ln(c/c^0) - 4\mu_{H_2} + 5eU \end{aligned}$$

And the contribution of c can be further corrected by a term of  $0.059 \lg(c)$ . Thus, the  $\Delta G_{diss}$  can be summarized as Eq. 61

$$\begin{aligned} \Delta G_{diss} &= G(PtNi) - G(PtNi - CrO_4) + 4\mu_{H_2O} + \mu_{Cr}^0 + 3eE_{Cr^{3+}/Cr}^0 + 0.059 \times \lg(1 \times 10^{-4}) - 4 \\ &\quad \mu_{H_2} + 5eU = -0.87 \text{ eV} \quad (61) \end{aligned}$$

All the results of screened elements are summarized in Table S5-S6. The bold number is the most negative dissolution free energy for each  $^*MO_4$  to represent the dissolution free energy of  $^*MO_4$ .

**Table S5.** Full list of dissolution free energy of  $^*MO_4$

| M  |                                                                          | $\Delta G_{diss}$<br>(eV) |
|----|--------------------------------------------------------------------------|---------------------------|
| Mo | $Mo^{3+} + 3e^- \rightarrow Mo(s) \#$                                    |                           |
|    | $Pt - Ni - MoO_4 + 8H^+ + 5e^- \rightarrow Pt - Ni + Mo^{3+} + 4H_2O \#$ | 1.60                      |
|    | $H_2MoO_4(aq) + 6H^+ + 6e^- \rightarrow Mo(s) + 4H_2O \#$                |                           |
|    | $Pt - Ni - MoO_4 + 2H^+ + 2e^- \rightarrow Pt - Ni + H_2MoO_4 \#$        | <b>0.16<sup>a</sup></b>   |
| V  | $V^{2+} + 2e^- \rightarrow V(s) \#$                                      |                           |
|    | $Pt - Ni - VO_4 + 8H^+ + 6e^- \rightarrow Pt - Ni + V^{2+} + 4H_2O \#$   | -0.68                     |
|    | $VO^{2+} + 2H^+ + 4e^- \rightarrow V(s) + H_2O \#$                       |                           |
|    | $Pt - Ni - VO_4 + 6H^+ + 2e^- \rightarrow Pt - Ni + VO^{2+} + 3H_2O \#$  | <b>-4.51</b>              |
| Cr | $Cr^{3+} + 3e^- \rightarrow Cr(s) \#$                                    | <b>-0.87</b>              |

|    |                                                                         |              |
|----|-------------------------------------------------------------------------|--------------|
|    | $Pt - Ni - CrO_4 + 8H^+ + 5e^- \rightarrow Pt - Ni + Cr^{3+} + 4H_2O\#$ |              |
|    | $HCrO_4^- + 7H^+ + 6e^- \rightarrow Cr(s) + 4H_2O\#$                    |              |
|    | $Pt - Ni - CrO_4 + H^+ + 2e^- \rightarrow Pt - Ni + HCrO_4^- \#$        | 2.31         |
|    | $Mn^{2+} + 2e^- \rightarrow Mn(s)\#$                                    |              |
| Mn | $Pt - Ni - MnO_4 + 8H^+ + 6e^- \rightarrow Pt - Ni + Mn^{2+} + 4H_2O\#$ | <b>-1.04</b> |
|    | $MnO_4^- + 8H^+ + 3e^- \rightarrow Mn(s) + 4H_2O\#$                     |              |
|    | $Pt - Ni - MnO_4 + e^- \rightarrow Pt - Ni + MnO_4^- \#$                | -0.89        |
|    | $Fe^{3+} + 3e^- \rightarrow Fe(s)\#$                                    |              |
| Fe | $Pt - Ni - FeO_4 + 8H^+ + 5e^- \rightarrow Pt - Ni + Fe^{3+} + 4H_2O\#$ | <b>-1.58</b> |
|    | $FeO_4^{2-} + 8H^+ + 6e^- \rightarrow Fe(s) + 4H_2O\#$                  |              |
|    | $Pt - Ni - FeO_4 + 2e^- \rightarrow Pt - Ni + FeO_4^{2-} \#$            | 8.79         |
|    | $Nb^{3+} + 3e^- \rightarrow Nb(s)\#$                                    |              |
| Nb | $Pt - Ni - NbO_4 + 8H^+ + 5e^- \rightarrow Pt - Ni + Nb^{3+} + 4H_2O\#$ | <b>-0.48</b> |
|    | $Tc^{2+} + 2e^- \rightarrow Tc(s)\#$                                    |              |
| Tc | $Pt - Ni - TcO_4 + 8H^+ + 6e^- \rightarrow Pt - Ni + Tc^{2+} + 4H_2O\#$ | 2.18         |
|    | $TcO_4^- + 8H^+ + 7e^- \rightarrow Tc(s) + 4H_2O\#$                     |              |
|    | $Pt - Ni - TcO_4 + e^- \rightarrow Pt - Ni + TcO_4^- \#$                | 0.19         |
|    | $Ru^{2+} + 2e^- \rightarrow Ru(s)\#$                                    |              |
| Ru | $Pt - Ni - RuO_4 + 8H^+ + 6e^- \rightarrow Pt - Ni + Ru^{2+} + 4H_2O\#$ | <b>-0.12</b> |
|    | $Os^{2+} + 2e^- \rightarrow Os(s)\#$                                    |              |
| Os | $Pt - Ni - OsO_4 + 8H^+ + 6e^- \rightarrow Pt - Ni + Os^{2+} + 4H_2O\#$ | <b>1.42</b>  |
|    | $Ta^{3+} + 3e^- \rightarrow Ta(s)\#$                                    |              |
| Ta | $Pt - Ni - TaO_4 + 8H^+ + 5e^- \rightarrow Pt - Ni + Ta^{3+} + 4H_2O\#$ | <b>1.59</b>  |
|    | $Re^{3+} + 3e^- \rightarrow Re(s)\#$                                    |              |
| Re | $Pt - Ni - ReO_4 + 8H^+ + 5e^- \rightarrow Pt - Ni + Re^{3+} + 4H_2O\#$ | <b>2.45</b>  |
|    | $ReO_4^- + 8H^+ + 7e^- \rightarrow Re(s) + 4H_2O\#$                     |              |
|    | $Pt - Ni - ReO_4 + e^- \rightarrow Pt - Ni + ReO_4^- \#$                | 3.28         |
|    | $W^{3+} + 3e^- \rightarrow W(s)\#$                                      |              |
| W  | $Pt - Ni - WO_4 + 8H^+ + 5e^- \rightarrow Pt - Ni + W^{3+} + 4H_2O\#$   | <b>3.23</b>  |

<sup>a</sup> The bold number is the most negative dissolution free energy for each <sup>\*</sup>MO<sub>4</sub>

**Table S6.** The most negative dissolution free energy for each <sup>\*</sup>MO<sub>4</sub>

| <sup>*</sup> MO <sub>4</sub> | $\Delta G_{diss}(eV)$ |
|------------------------------|-----------------------|
| V                            | -4.51                 |
| Cr                           | -0.87                 |
| Mn                           | -1.04                 |
| Fe                           | -1.58                 |
| Nb                           | -0.48                 |
| Mo                           | 0.16                  |
| Tc                           | 0.19                  |
| Ru                           | -0.12                 |
| Os                           | 1.42                  |

|    |      |
|----|------|
| Ta | 1.59 |
| Re | 2.45 |
| W  | 3.23 |

---

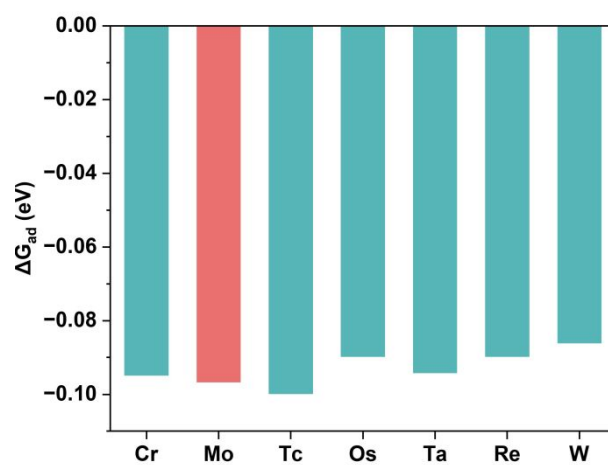

**Figure S34.** O<sub>2</sub> adsorption energy on the Pt-Ni-\*MO<sub>4</sub> surface (M is the screened elements)

## 6. Dissolution Free Energy of \*MoO<sub>4</sub>

In this section, we elaborate the calculation of dissolution free energy of \*MoO<sub>4</sub>. As the \*MoO<sub>4</sub> group can left from the surface by forms of H<sub>2</sub>MoO<sub>4</sub> and Mo<sup>3+</sup>, we give detailed calculation of each ion forms of \*MoO<sub>4</sub>.

### For the form of H<sub>2</sub>MoO<sub>4</sub>

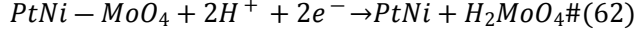

$$\begin{aligned} \Delta G &= G(PtNi) + \mu_{H_2MoO_4} - G(PtNi - MoO_4) - 2\mu_{H^+} - 2\mu_{e^-} \# \\ &= G(PtNi) + \mu_{H_2MoO_4}^0 + k_B T \ln(c/c^0) - G(PtNi - MoO_4) - 2\mu_{H^+} - 2\mu_{e^-} \# (63) \end{aligned}$$

where the concentration of ions set as  $c = 10^{-4}$  mol/L. According to the definition of electrode potential, the free energy change of Eq. 62 is 0 when at the electrode potential of  $E_{H_2MoO_4/Mo}^0$ . Then, we can get that

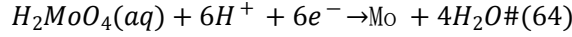

$$\Delta G = \mu_{Mo}^0 + 4\mu_{H_2O} - 6\mu_{H^+} - 6\mu_{e_{\bar{H}_2MoO_4/Mo}} - \mu_{H_2MoO_4}^0 = 0 \# (65)$$

where  $\mu_{Mo}^0$  is the energy of bulk Mo.

$$\begin{aligned} \mu_{H_2MoO_4}^0 &= \mu_{Mo}^0 + 4\mu_{H_2O} - 6\mu_{H^+} - 6\mu_{e_{\bar{H}_2MoO_4/Mo}} \# \\ &= \mu_{Mo}^0 + 4\mu_{H_2O} - 6\mu_{H^+} + (6\mu_{e^{SHE}} - 6\mu_{e_{\bar{H}_2MoO_4/Mo}}) - 6\mu_{e^{SHE}} \# (66) \\ &= \mu_{Mo}^0 + 4\mu_{H_2O} - 6\mu_{H^+} + 6eE_{H_2MoO_4/Mo}^0 - 6\mu_{e^{SHE}} \end{aligned}$$

Substituting Eq. 66 into Eq. 63, we get

$$\begin{aligned} \Delta G &= G(PtNi) + \mu_{H_2MoO_4}^0 + k_B T \ln(c/c^0) - G(PtNi - MoO_4) - 2\mu_{H^+} - 2\mu_{e^-} \# \\ &= G(PtNi) - G(PtNi - MoO_4) \\ &+ \mu_{Mo}^0 + 4\mu_{H_2O} - 6\mu_{H^+} + 6eE_{H_2MoO_4/Mo}^0 - 6\mu_{e^{SHE}} + k_B T \ln(c/c^0) - 2\mu_{H^+} - 2\mu_{e^-} \# \\ &= G(PtNi) - G(PtNi - MoO_4) + \mu_{Mo}^0 + 4\mu_{H_2O} + 6eE_{H_2MoO_4/Mo}^0 + k_B T \ln(c/c^0) \\ &\quad - 8\mu_{H^+} - 6\mu_{e^{SHE}} - 2\mu_{e^-} \# \\ &= G(PtNi) - G(PtNi - MoO_4) + \mu_{Mo}^0 + 4\mu_{H_2O} + 6eE_{H_2MoO_4/Mo}^0 + k_B T \ln(c/c^0) \\ &\quad - 8(\mu_{H^+} + \mu_{e^-}) - 6\mu_{e^{SHE}} + 6\mu_{e^-} \# \\ &= G(PtNi) - G(PtNi - MoO_4) + \mu_{Mo}^0 + 4\mu_{H_2O} + 6eE_{H_2MoO_4/Mo}^0 + k_B T \ln(c/c^0) \# (67) \\ &\quad - 8\left(\frac{1}{2}\mu_{H_2} - \mu_{e^{SHE}} + \mu_{e^-}\right) - 6(\mu_{e^{SHE}} - \mu_{e^-}) \\ &= G(PtNi) - G(PtNi - MoO_4) + \mu_{Mo}^0 + 4\mu_{H_2O} + 6eE_{H_2MoO_4/Mo}^0 + k_B T \ln(c/c^0) \\ &\quad - 4\mu_{H_2} + 8eU - 6eU \\ &= G(PtNi) - G(PtNi - MoO_4) + \mu_{Mo}^0 + 4\mu_{H_2O} + 6eE_{H_2MoO_4/Mo}^0 + k_B T \ln(c/c^0) \\ &\quad - 4\mu_{H_2} + 2eU \end{aligned}$$

Substituting  $c = 10^{-4}$  mol/L into Eq. 67, we get

$$\begin{aligned} \Delta G_{diss} &= G(PtNi) - G(PtNi - MoO_4) + \mu_{Mo}^0 + 4\mu_{H_2O} + 6eE_{H_2MoO_4/Mo}^0 + 0.059 \times \lg(1 \times 10^{-4}) \\ &- 4\mu_{H_2} + 2eU = 0.16 \text{ eV} \# (68) \end{aligned}$$

### For the form of Mo<sup>3+</sup>,

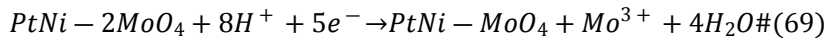

$$\begin{aligned} \Delta G &= G(PtNi) + \mu_{Mo^{3+}} + 4\mu_{H_2O} - G(PtNi - MoO_4) - 8\mu_{H^+} - 5\mu_{e^-} \# \\ &= G(PtNi) + \mu_{Mo^{3+}}^0 + k_B T \ln(c/c^0) + 4\mu_{H_2O} - G(PtNi - MoO_4) - 8\mu_{H^+} - 5\mu_{e^-} \# (70) \end{aligned}$$

where the concentration of ions set as  $c = 10^{-4}$  mol/L.

To calculate  $\mu_{Mo^{3+}}^0$ , we use the standard half-electrode potential  $E_{Mo^{3+}/Mo}^0$

According to the definition of electrode potential, the free energy change of Eq. 71 is 0 when at the electrode potential of  $E_{Mo^{3+}/Mo}^0$ . Then, we can get that

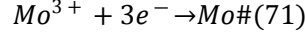

$$\Delta G = \mu_{Mo}^0 - \mu_{Mo^{3+}}^0 - 3\mu_{e_{Mo^{3+}/Mo}^-} = 0 \# (72)$$

$$\begin{aligned} \mu_{Mo^{3+}}^0 &= \mu_{Mo}^0 - 3\mu_{e_{Mo^{3+}/Mo}^-} = \mu_{Mo}^0 - 3\mu_{e_{Mo^{3+}/Mo}^-} = \mu_{Mo}^0 + 3\mu_e^{SHE} - 3\mu_{e_{Mo^{3+}/Mo}^-} - 3\mu_e^{SHE} \# \\ &= \mu_{Mo}^0 + 3eE_{Mo^{3+}/Mo}^0 - 3\mu_e^{SHE} \end{aligned} \quad (73)$$

where  $\mu_{Mo}^0$  is the energy of bulk Mo.

Substituting Eq. 73 into Eq. 70, we get

$$\begin{aligned} \Delta G &= G(PtNi - MoO_4) + \mu_{Mo^{3+}}^0 + k_B T \ln(c/c^0) + 4\mu_{H_2O} - G(PtNi - 2MoO_4) - 8\mu_{H^+} - 5\mu_{e^-} \\ &= G(PtNi - MoO_4) + \mu_{Mo}^0 + 3eE_{Mo^{3+}/Cr}^0 - 3\mu_e^{SHE} + k_B T \ln(c/c^0) \\ &\quad + 4\mu_{H_2O} - G(PtNi - 2MoO_4) - 8\mu_{H^+} - 5\mu_{e^-} \\ &= G(PtNi - MoO_4) - G(PtNi - 2MoO_4) + 4\mu_{H_2O} \\ &\quad + \mu_{Mo}^0 + 3eE_{Mo^{3+}/Mo}^0 + k_B T \ln(c/c^0) - 3\mu_e^{SHE} - 8(\mu_{H^+} + \mu_{e^-}) + 3\mu_{e^-} \\ &= G(PtNi - MoO_4) - G(PtNi - 2MoO_4) + 4\mu_{H_2O} \\ &\quad + \mu_{Mo}^0 + 3eE_{Mo^{3+}/Mo}^0 + k_B T \ln(c/c^0) - 8(\mu_{H^+} + \mu_{e^-}) - 3(\mu_e^{SHE} - \mu_{e^-}) \\ &= G(PtNi - MoO_4) - G(PtNi - 2MoO_4) + 4\mu_{H_2O} \\ &\quad + \mu_{Mo}^0 + 3eE_{Mo^{3+}/Mo}^0 + k_B T \ln(c/c^0) - 8\left(\frac{1}{2}\mu_{H_2} - \mu_e^{SHE} + \mu_{e^-}\right) - 3(\mu_e^{SHE} - \mu_{e^-}) \\ &= G(PtNi - MoO_4) - G(PtNi - 2MoO_4) + 4\mu_{H_2O} \\ &\quad + \mu_{Mo}^0 + 3eE_{Mo^{3+}/Mo}^0 + k_B T \ln(c/c^0) - 4\mu_{H_2} + 8(\mu_e^{SHE} - \mu_{e^-}) - 3(\mu_e^{SHE} - \mu_{e^-}) \\ &= G(PtNi - MoO_4) - G(PtNi - 2MoO_4) + 4\mu_{H_2O} \\ &\quad + \mu_{Mo}^0 + 3eE_{Mo^{3+}/Mo}^0 + k_B T \ln(c/c^0) + k_B T \ln(c/c^0) - 4\mu_{H_2} + 5(\mu_e^{SHE} - \mu_{e^-}) \\ &= G(PtNi - MoO_4) - G(PtNi - 2MoO_4) + 4\mu_{H_2O} \\ &\quad + \mu_{Mo}^0 + 3eE_{Mo^{3+}/Mo}^0 + k_B T \ln(c/c^0) - 4\mu_{H_2} + 5eU \end{aligned} \quad (74)$$

Substituting  $c = 10^{-4}$  mol/L into Eq. 74, we get

$$\begin{aligned} \Delta G_{diss} &= G(PtNi - MoO_4) - G(PtNi - 2MoO_4) + 4\mu_{H_2O} + \mu_{Mo}^0 + 3eE_{Mo^{3+}/Mo}^0 + 0.059 \times \lg \\ &\quad (1 \times 10^{-4}) - 4\mu_{H_2} + 5eU = 1.60 \text{ eV} \end{aligned} \quad (75)$$

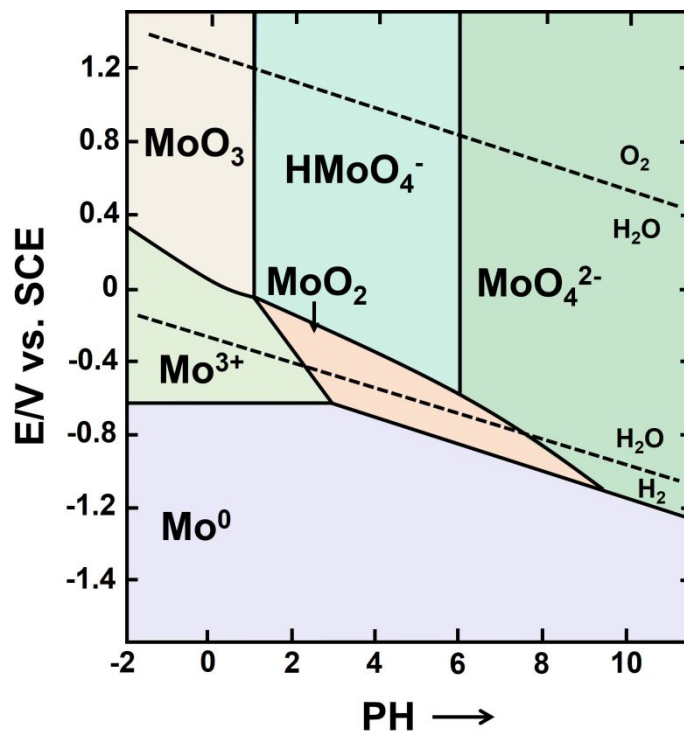

**Figure S35.** Experimental Pourbaix diagram of the Mo-H<sub>2</sub>O system<sup>10</sup>. SCE is the saturated calomel electrode.  $E_{SHE}$  is the standard potential of the  $E_{SCE}$  at 298.15K (0.2145V). Figure adapted from ref. 10. Copyright 2012 Wiley Publishing Group.

We note that the adsorbed  $\text{MoO}_4$  species are water-soluble under alkaline conditions (while it is not under acidic conditions)<sup>6,10-13</sup>. Figure S35 shows the experimental Pourbaix diagram of the Mo-H<sub>2</sub>O system. We can see that the standard electrode potential of  $E(\text{MoO}_4^{2-}/\text{Mo})$  under alkaline conditions ( $\text{pH} > 10$ ) is negative. Accordingly, the Nernst equation [ $\Delta G = -nF E(\text{MoO}_4^{2-}/\text{Mo})$ ] suggests that the free energy change of  $\text{MoO}_4^{2-} \rightarrow \text{Mo}$  is positive, indicating the adsorbed  $\text{MoO}_4$  species are water-soluble under alkaline conditions.



## 7. The specific activities of ORR catalysts at different CV cycles from experimental literature

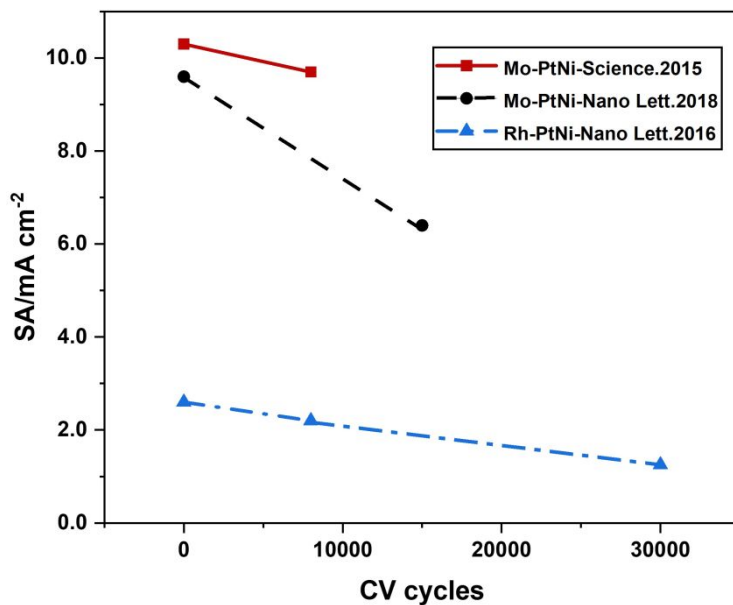

**Figure S36.** The specific activities (SA) of ORR catalysts at different CV cycles from experimental literature<sup>6, 13-14</sup>.

## Reference

1. Huang, S.-D.; Shang, C.; Zhang, X.-J.; Liu, Z.-P., Material discovery by combining stochastic surface walking global optimization with a neural network. *Chem. Sci.* **2017**, *8* (9), 6327-6337.
2. Huang, S.-D.; Shang, C.; Kang, P.-L.; Zhang, X.-J.; Liu, Z.-P., LASP: Fast global potential energy surface exploration. *WIRES COMPUT MOL SCI* **2019**, *9* (6).
3. Shang, C.; Liu, Z.-P., Stochastic Surface Walking Method for Structure Prediction and Pathway Searching. *J. Chem. Theory Comput.* **2013**, *9* (3), 1838-1845.
4. Shang, C.; Zhang, X.-J.; Liu, Z.-P., Stochastic surface walking method for crystal structure and phase transition pathway prediction. *Phys. Chem. Chem. Phys.* **2014**, *16* (33), 17845-17856.
5. Zhang, X.-J.; Shang, C.; Liu, Z.-P., Stochastic surface walking reaction sampling for resolving heterogeneous catalytic reaction network: A revisit to the mechanism of water-gas shift reaction on Cu. *J. Chem. Phys.* **2017**, *147* (15), 152706.
6. Huang, X.; Zhao, Z.; Cao, L.; Chen, Y.; Zhu, E.; Lin, Z.; Li, M.; Yan, A.; Zettl, A.; Wang, Y. M.; Duan, X.; Mueller, T.; Huang, Y., High-performance transition metal-doped Pt<sub>3</sub>Ni octahedra for oxygen reduction reaction. *Science* **2015**, *348* (6240), 1230-1234.
7. Li, Y.-F.; Liu, Z.-P., Particle Size, Shape and Activity for Photocatalysis on Titania Anatase Nanoparticles in Aqueous Surroundings. *J. Am. Chem. Soc.* **2011**, *133* (39), 15743-15752.
8. Bard Allen, J.; Faulkner Larry, R., *Electrochemical methods: fundamentals and applications*. Wiley New York: 2001.
9. Bosch, R.-W.; Féron, D.; Celis, J.-P., *Electrochemistry in light water reactors: reference electrodes, measurement, corrosion and tribocorrosion issues*. Elsevier: 2007.
10. Saji, V. S.; Lee, C.-W., Molybdenum, Molybdenum Oxides, and their Electrochemistry. *ChemSusChem* **2012**, *5* (7), 1146-1161.
11. Jiang, K.; Zhao, D.; Guo, S.; Zhang, X.; Zhu, X.; Guo, J.; Lu, G.; Huang, X., Efficient oxygen reduction catalysis by subnanometer Pt alloy nanowires. *Sci. Adv.* *3* (2), e1601705.
12. Li, M.; Zhao, Z.; Cheng, T.; Fortunelli, A.; Chen, C.-Y.; Yu, R.; Zhang, Q.; Gu, L.; Merinov, B. V.; Lin, Z.; Zhu, E.; Yu, T.; Jia, Q.; Guo, J.; Zhang, L.; Goddard, W. A.; Huang, Y.; Duan, X., Ultrafine jagged platinum nanowires enable ultrahigh mass activity for the oxygen reduction reaction. *Science* **2016**, *354* (6318), 1414-1419.
13. Jia, Q.; Zhao, Z.; Cao, L.; Li, J.; Ghoshal, S.; Davies, V.; Stavitski, E.; Attenkofer, K.; Liu, Z.; Li, M.; Duan, X.; Mukerjee, S.; Mueller, T.; Huang, Y., Roles of Mo Surface Dopants in Enhancing the ORR Performance of Octahedral PtNi Nanoparticles. *Nano Lett.* **2018**, *18* (2), 798-804.
14. Beermann, V.; Gocyla, M.; Willinger, E.; Rudi, S.; Heggen, M.; Dunin-Borkowski, R. E.; Willinger, M.-G.; Strasser, P., Rh-Doped Pt–Ni Octahedral Nanoparticles: Understanding the Correlation between Elemental Distribution, Oxygen Reduction Reaction, and Shape Stability. *Nano Lett.* **2016**, *16* (3), 1719-1725.
